# Supplementary material for: A Comparison of 100 Human Genes Using an Alu Element-Based Instability Model
Source: PubMed Central journal article supplement (PMC3670932; doi:10.1371/journal.pone.0065188), 2013-06-03
Supplement: pone.0065188.s001.pdf [file pone.0065188.s001.pdf]

# Studies Linking *Alu*-related Deletions to Disease Phenotypes

| <u>No.</u> | <u>First Author</u> | <u>Year</u> | <u>Locus</u> | <u>Phenotype<sup>(1)</sup></u> | <u>Title</u>                                                                                                                                                         | <u>Journal<sup>(2)</sup></u> | <u>Vol</u> | <u>Issue</u> |
|------------|---------------------|-------------|--------------|--------------------------------|----------------------------------------------------------------------------------------------------------------------------------------------------------------------|------------------------------|------------|--------------|
| 1          | F. Duraturo         | 2013        | 2p21         | LS                             | Contribution of Large Genomic Rearrangements in Italian Lynch Syndrome Patients: Characterization of a Novel <i>Alu</i> -Mediated Deletion                           | BRI                          | '13        | 1            |
| 2          | K. Kitada           | 2013        | 7q22.1       | C                              | <i>Alu-Alu</i> Fusion Sequences Identified at Junction Sites of Copy Number Amplified Regions in Cancer Cell Lines                                                   | CGR                          | 139        | 1            |
| 3          | C. Vaughn           | 2013        | 7p22.1       | LS                             | The Frequency of Previously Undetectable Deletions Involving 3' Exons of the <i>PMS2</i> Gene                                                                        | GCC                          | 52         | 1            |
| 4          | M. Barbaro          | 2012        | 3q11.2       | HCP                            | Identification of an <i>AluY</i> -mediated deletion of exon 5 in <i>CPOX</i> gene by MLPA analysis in patients with hereditary coproporphyrria                       | CG                           | 81         | 3            |
| 5          | N. Bondurand        | 2012        | 22q13.1      | WS IV                          | <i>Alu</i> -mediated deletion of <i>SOX10</i> regulatory elements in Waardenburg syndrome type 4                                                                     | EJHG                         | 20         | 9            |
| 6          | V. Chanavat         | 2012        | 11p11.2      | HCM                            | Molecular characterization of a large <i>MYBPC3</i> rearrangement in a cohort of 100 Unrelated patients with hypertrophic cardiomyopathy                             | EJMG                         | 55         | 3            |
| 7          | M. Coutinho         | 2012        | 12q23.2      | ML II                          | <i>Alu-Alu</i> Recombination Underlying the First Large Genomic Deletion in GlcNAc-Phosphotransferase Alpha/Beta ( <i>GNPTAB</i> ) Gene in a MLII Alpha/Beta Patient | JIMD                         | 4          | 1            |
| 8          | A. Eiden-Plach      | 2012        | 8p11.23      | LCAH                           | <i>AluSx</i> repeat-induced homozygous deletion of the <i>StAR</i> gene causes lipoid congenital adrenal hyperplasia                                                 | JSBMB                        | 130        | 1-2          |
| 9          | A. Gonçalves        | 2012        | 17p13.1      | LFS                            | Li-Fraumeni-like syndrome associated with a large <i>BRCA1</i> intragenic deletion                                                                                   | BMCC                         | 12         | 1            |
| 10         | A. Jelassi          | 2012        | 19p13.2      | ADH                            | Genomic characterization of two deletions in the <i>LDLR</i> gene in Tunisian patients with familial hypercholesterolemia                                            | CCA                          | 414        | -            |
| 11         | H. Mahmoudi         | 2012        | 13q14.2      | HY                             | Identification of an <i>Alu</i> -mediated 12.2-kb deletion of the complete <i>LPAR6 (P2RY5)</i> gene in a Turkish family with hypotrichosis and wooly hair           | ED                           | 21         | 6            |
| 12         | M. Pereira          | 2012        | 15q21.1      | SPG 11                         | <i>Alu</i> elements mediate large <i>SPG11</i> gene rearrangements: further spatacsin mutations                                                                      | GM                           | 14         | 1            |
| 13         | L. Pezzoli          | 2012        | 11p11.2      | HCM                            | A new mutational mechanism for hypertrophic cardiomyopathy                                                                                                           | GE                           | 507        | 2            |
| 14         | M. Vlckova          | 2012        | 6q           | M                              | Mechanism and Genotype-Phenotype Correlation of Two Proximal 6q Deletions Characterized Using mBAND, FISH, Array CGH, and DNA Sequencing                             | CGR                          | 136        | 1            |
| 15         | T. Arai             | 2011        | Xq22.1       | XLA                            | Genetic analysis of contiguous X-chromosome deletion syndrome encompassing the <i>BTK</i> and <i>TIMM8A</i> genes                                                    | JHG                          | 56         | 8            |

# Studies Linking *Alu*-related Deletions to Disease Phenotypes

|    |                    |      |          |        |                                                                                                                                                                 |           |     |    |
|----|--------------------|------|----------|--------|-----------------------------------------------------------------------------------------------------------------------------------------------------------------|-----------|-----|----|
| 16 | P. Boone           | 2011 | 2p22.3   | SPG IV | <i>Alu</i> -specific microhomology-mediated deletion of the final exon of <i>SPAST</i> in three unrelated subjects with hereditary spastic paraplegia           | GM        | 13  | 6  |
| 17 | G. Borck           | 2011 | 6p24.3-2 | CC     | An <i>Alu</i> repeat-mediated genomic <i>GCNT2</i> deletion underlies congenital cataracts and adult i blood group                                              | HG        | 131 | 2  |
| 18 | M. Cozar           | 2011 | 1q22     | GD     | Molecular characterization of a new deletion of the <i>GBA1</i> gene due to an inter <i>Alu</i> recombination event                                             | MGM       | 102 | 2  |
| 19 | I. Guella          | 2011 | 1q24.2   | FVD    | Identification of the first <i>Alu</i> -mediated large deletion involving the <i>F5</i> gene in a compound heterozygous patient with severe factor V deficiency | JTH       | 106 | 2  |
| 20 | X. Guo             | 2011 | 22q11.2  | DGS    | Characterization of the past and current duplication activities in the human 22q11.2 region                                                                     | BMCG      | 12  | 71 |
| 21 | I. Jennes          | 2011 | 8q24.11  | MO     | Breakpoint characterization of large deletions in <i>EXT1</i> or <i>EXT2</i> in 10 Multiple Osteochondromas families                                            | BMCMG     | 12  | 85 |
| 22 | R. Kuiper          | 2011 | 2p21     | LS     | Recurrence and Variability of Germline <i>EPCAM</i> Deletions in Lynch Syndrome                                                                                 | HGVS      | 32  | 4  |
| 23 | M. Kurnikova       | 2011 | 1q21.3   | SCN    | <i>Alu</i> -Mediated Recombination in the <i>HAX1</i> Gene as the Molecular Basis of Severe Congenital Neutropenia                                              | AJMG 155A |     | 3  |
| 24 | M. Legarda         | 2011 | 16q22.2  | T II   | Large <i>TAT</i> deletion in tyrosinaemia type II patient                                                                                                       | MGM       | 104 | 3  |
| 25 | J. Oshima          | 2011 | Xq28     | MPS II | LCR-initiated rearrangements at the <i>IDS</i> locus, completed with <i>Alu</i> -mediated recombination or non-homologous end joining                           | JHG       | 56  | 7  |
| 26 | L. Perez-Cabornero | 2011 | 2p21     | LS     | Characterization of New Founder <i>Alu</i> -Mediated Rearrangements in <i>MSH2</i> Gene Associated with a Lynch Syndrome Phenotype                              | CPR       | 4   | 10 |
| 27 | H. Raef            | 2011 | 11q13.1  | MEN I  | A novel deletion of the <i>MEN1</i> gene in a large family of multiple endocrine neoplasia type 1 ( <i>MEN1</i> ) with aggressive phenotype                     | CE        | 75  | 6  |
| 28 | A. Rose            | 2011 | 19q13.42 | RP     | A 112kb deletion in chromosome 19q13.42 leads to retinitis pigmentosa                                                                                           | IOVS      | 52  | 9  |
| 29 | M. Sluiter         | 2011 | 17q21.31 | BC     | Large genomic rearrangements of the <i>BRCA1</i> and <i>BRCA2</i> genes: review of the Literature and report of a novel <i>BRCA1</i> mutation                   | BCRT      | 125 | 2  |
| 30 | M. Soejima/Y. Koda | 2011 | 19q13.33 | BP     | TaqMan-based real-time polymerase chain reaction for detection of <i>FUT2</i> copy number Variations: identification of novel <i>Alu</i> -mediated deletion     | T         | 51  | 4  |
| 31 | J. Wan             | 2011 | 19p13.2  | EA II  | Large genomic deletions in <i>CACNA1A</i> cause episodic ataxia type 2                                                                                          | FN        | 2   | -  |
| 32 | K. Champion        | 2010 | 17q21.2  | SS B   | Identification and characterization of a novel homozygous deletion in the $\alpha$ -N-acetyl-glucosaminidase gene in a patient with Sanfilippo type B syndrome  | MGM       | 100 | 1  |

# Studies Linking *Alu*-related Deletions to Disease Phenotypes

|    |               |      |          |            |                                                                                                                                                                                         |           |     |   |
|----|---------------|------|----------|------------|-----------------------------------------------------------------------------------------------------------------------------------------------------------------------------------------|-----------|-----|---|
| 33 | M. DeRosa     | 2010 | 19p13.3  | PJS        | <i>Alu</i> -Mediated Genomic Deletion of the Serine/Threonine Protein Kinase 11 ( <i>STK11</i> ) Gene in Peutz-Jeghers Syndrome                                                         | G         | 138 | 7 |
| 34 | M. Gentsch    | 2010 | 1q25.3   | CGD        | <i>Alu</i> -Repeat--Induced Deletions Within the <i>NCF2</i> Gene Causing p67- <i>phoxi</i> -Deficient Chronic Granulomatous Disease (CGD)                                              | HGVS      | 31  | 2 |
| 35 | A. Janecke    | 2010 | 11q23.1  | PGL        | Identification of a 4.9-kilo base-pair <i>Alu</i> -mediated founder <i>SDHD</i> deletion in two extended paraganglioma families from Austria                                            | JHG       | 55  | 3 |
| 36 | M. Kleppe     | 2010 | 18p11.21 | T-ALL      | Deletion of protein tyrosine phosphatase gene <i>PTPN2</i> in T-cell acute lymphoblastic leukemia                                                                                       | NG        | 42  | 6 |
| 37 | A. Lindstrand | 2010 | 10p14    | HDR        | Molecular and Clinical Characterization of Patients with Overlapping 10p Deletions                                                                                                      | AJMG 152A |     | 5 |
| 38 | M. McCabe     | 2010 | 19p13.3  | PJS        | Homozygous Deletion of the <i>STK11/LKB1</i> Locus and the Generation of Novel Fusion Transcripts in Cervical Cancer Cells                                                              | CGC       | 197 | 2 |
| 39 | M. Phylipsen  | 2010 | 16p13.3  | $\alpha$ T | A new $\alpha^0$ -thalassemia deletion found in a Dutch family (- <sup>AW</sup> )                                                                                                       | BCMD      | 45  | 2 |
| 40 | V. Picard     | 2010 | 1q25.1   | AT I       | Detection and characterization of large <i>SERPINC1</i> deletions in type I inherited antithrombin deficiency                                                                           | HG        | 127 | 1 |
| 41 | N. Resta      | 2010 | 19p13.3  | PJS        | Breakpoint determination of 15 large deletions in Peutz-Jeghers subjects                                                                                                                | HG        | 128 | 4 |
| 42 | Z. Yang       | 2010 | Xq24     | DD         | LAMP2 Microdeletions in Patients with Danon Disease                                                                                                                                     | CCG       | 3   | 2 |
| 43 | F. Zhang      | 2010 | 17p12    | N          | Mechanisms for Nonrecurrent Genomic Rearrangements Associated with CMT1A or HNPP: Rare CNVs as a Cause for Missing Heritability                                                         | AJHG      | 86  | 6 |
| 44 | L. Desviat    | 2009 | 13q32.3  | PA         | High frequency of large genomic deletions in the <i>PCCA</i> gene causing propionic acidemia                                                                                            | MGM       | 96  | 4 |
| 45 | A. Erez       | 2009 | Xp22.13  | RTT        | <i>Alu</i> -specific microhomology-mediated deletions in <i>CDKL5</i> in females with early-onset seizure disorder                                                                      | N         | 10  | 4 |
| 46 | G. Franke     | 2009 | 3p25.3   | VHL        | <i>Alu-Alu</i> Recombination Underlies the Vast Majority of Large <i>VHL</i> Germline Deletions: Molecular Characterization and Genotype--Phenotype Correlations in <i>VHL</i> Patients | HM        | 30  | 5 |
| 47 | C. Oliveria   | 2009 | 16q22.1  | HDGC       | Germline <i>CDH1</i> deletions in hereditary diffuse gastric cancer families                                                                                                            | HMG       | 18  | 9 |
| 48 | A. Pangrazio  | 2009 | 11q13.2  | ARO        | Characterization of a Novel <i>Alu-Alu</i> Recombination-Mediated Genomic Deletion in the <i>TCIRG1</i> Gene in Five Osteopetrotic Patients                                             | JBMR      | 24  | 1 |
| 49 | R. Quental    | 2009 | Xp11.4   | OTCD       | Molecular mechanisms underlying large genomic deletions in ornithine transcarbamylase ( <i>OTC</i> ) gene                                                                               | CG        | 75  | 5 |

# Studies Linking *Alu*-related Deletions to Disease Phenotypes

|    |                   |      |          |       |                                                                                                                                                                                       |           |     |     |
|----|-------------------|------|----------|-------|---------------------------------------------------------------------------------------------------------------------------------------------------------------------------------------|-----------|-----|-----|
| 50 | H. Singh          | 2009 | Xq28     | BS    | A Novel <i>Alu</i> -Mediated Xq28 Microdeletion Ablates <i>TAZ</i> and Partially Deletes <i>DNL1L</i> in a Patient with Barth Syndrome                                                | AJMG 149A | 5   |     |
| 51 | A. Mohl           | 2008 | 12p13.31 | VWD   | An <i>Alu</i> -mediated novel large deletion is the most frequent cause of type 3 von Willebrand disease in Hungary                                                                   | JTH       | 6   | 10  |
| 52 | S. Quental        | 2008 | 19q13.2  | MSUD  | Maple syrup urine disease due to a new large deletion at <i>BCKDHA</i> caused by non-homologous recombination                                                                         | JIMD      | 31  | 2   |
| 53 | M. Zikan          | 2008 | 17q21.31 | BC    | Novel complex genomic rearrangement of the <i>BRCA1</i> gene                                                                                                                          | MR        | 637 | 1-2 |
| 54 | S. Armaou         | 2007 | 17q21.31 | BC    | Novel genomic rearrangements in the <i>BRCA1</i> gene detected in greek breast/ovarian cancer patients                                                                                | EJC       | 43  | 2   |
| 55 | E. Costa          | 2007 | 7q11.21  | SDS   | Identification of a novel <i>AluSx</i> -mediated deletion of exon 3 in the <i>SBDS</i> gene in a patient with Shwachman-Diamond syndrome                                              | BCMD      | 39  | 1   |
| 56 | T. Fukao          | 2007 | Xp22.13  | XLG   | Identification of <i>Alu</i> -mediated, large deletion-spanning introns 19-26 in <i>PHKA2</i> in a patient with X-linked liver glycogenosis (hepatic phosphorylase kinase deficiency) | MGM       | 92  | 1-2 |
| 57 | B. Hayward        | 2007 | 2p22.3   | L     | Extensive Gene Conversion at the <i>PMS2</i> DNA Mismatch Repair Locus                                                                                                                | HM        | 28  | 5   |
| 58 | M. Okubo          | 2007 | 8p21.3   | LPL   | A novel complex deletion--insertion mutation mediated by <i>Alu</i> repetitive elements leads to lipoprotein lipase deficiency                                                        | MGM       | 92  | 3   |
| 59 | M. Smyk           | 2007 | Xp21.2   | AHC   | Male-to-female sex reversal associated with ~250 kb deletion upstream of <i>NR0B1</i> ( <i>DAX1</i> )                                                                                 | HG        | 122 | 1   |
| 60 | E. Di Pierro      | 2006 | 11q23.3  | AIP   | A large deletion on chromosome 11 in acute intermittent porphyria                                                                                                                     | BCMD      | 37  | 1   |
| 61 | A. Fukuuchi       | 2006 | 11q13.1  | MEN I | A Whole <i>MEN1</i> Gene Deletion Flanked by <i>Alu</i> Repeats in a Family with Multiple Endocrine Neoplasia Type 1                                                                  | JJCO      | 36  | 11  |
| 62 | C. Has            | 2006 | 20p12.3  | KS    | Molecular Basis of Kindler Syndrome in Italy: Novel and Recurrent <i>Alu/Alu</i> Recombination, Splice Site, Nonsense, and Frameshift Mutations in the <i>KIND1</i> Gene              | JID       | 126 | 8   |
| 63 | G. Humbert        | 2006 | 15q26.1  | RPA   | Homozygous Deletion Related to <i>Alu</i> Repeats in <i>RLBP1</i> Causes Retinitis Punctata Albescens                                                                                 | IOVS      | 47  | 11  |
| 64 | V. Matejas        | 2006 | 17p12    | HNPP  | Identification of <i>Alu</i> elements mediating a partial <i>PMP22</i> deletion                                                                                                       | N         | 7   | 2   |
| 65 | S. Preisler-Adams | 2006 | 17q21.31 | BC    | Gross rearrangements in <i>BRCA1</i> but not <i>BRCA2</i> play a notable role in predisposition to breast and ovarian cancer in high-risk families of German origin                   | CGC       | 168 | 1   |
| 66 | F. Xie            | 2006 | 12p13.31 | VWD   | A novel <i>Alu</i> -mediated 61-kb deletion of the von Willebrand factor ( <i>VWF</i> ) gene whose breakpoints co-locate with putative matrix attachment regions                      | BCMD      | 36  | 3   |

# Studies Linking *Alu*-related Deletions to Disease Phenotypes

|    |                  |      |          |        |                                                                                                                                                                                                                  |     |     |     |
|----|------------------|------|----------|--------|------------------------------------------------------------------------------------------------------------------------------------------------------------------------------------------------------------------|-----|-----|-----|
| 67 | G. Zhang         | 2006 | 6q27     | T2D    | Identification of <i>Alu</i> -mediated, large deletion-spanning exons 2-4 in a patient with mitochondrial acetoacetyl-CoA thiolase deficiency                                                                    | MGM | 89  | 3   |
| 68 | S. Agata         | 2005 | 13q13.1  | BC     | Large genomic deletions inactivate the <i>BRCA2</i> gene in breast cancer families                                                                                                                               | JMG | 42  | 10  |
| 69 | C. Bergmann      | 2005 | 6p12.3-2 | ARPKD  | Multi-exon deletions of the <i>PKHD1</i> gene cause autosomal recessive polycystic kidney disease (ARPKD)                                                                                                        | JMG | 42  | 10  |
| 70 | F. Charbonnier   | 2005 | 2p21     | HNPCC  | The 5' Region of the <i>MSH2</i> Gene Involved in Hereditary Non-Polyposis Colorectal Cancer Contains a High Density of Recombinogenic Sequences                                                                 | HM  | 26  | 3   |
| 71 | F. del Castillo  | 2005 | 13q12.11 | ARNSHI | A novel deletion involving the connexin-30 gene, del( <i>GJB6-d13s1854</i> ), found in <i>trans</i> with mutations in the <i>GJB2</i> gene (connexin-26) in subjects with DFNB1 non-syndromic hearing impairment | JMG | 42  | 7   |
| 72 | C. Dobson-Stone  | 2005 | 9q21.2   | ChAc   | Identification of a <i>VPS13A</i> founder mutation in French Canadian families with chorea-acanthocytosis                                                                                                        | N   | 6   | 3   |
| 73 | J. Douglas       | 2005 | 5q35.2-3 | SS     | Partial <i>NSD1</i> deletions cause 5% of Sotos syndrome and are readily identifiable by multiplex ligation dependent probe amplification                                                                        | JMG | 42  | 9   |
| 74 | C. Eng           | 2005 | Xq22.1   | FD     | Molecular Basis of Fabry Disease: Mutations and Polymorphisms in the Human $\alpha$ -Galactosidase A Gene                                                                                                        | HM  | 3   | 2   |
| 75 | C. Giunta        | 2005 | 1p36.22  | EDS    | Mutation analysis of the <i>PLOD1</i> gene: An efficient multistep approach to the molecular diagnosis of the kyphoscoliotic type of Ehlers-Danlos syndrome (EDS VIA)                                            | MGM | 86  | 1-2 |
| 76 | S. Hsieh         | 2005 | 1p36     | HCC    | High-freq. <i>Alu</i> -mediated recomb./del. within the <i>hCAD</i> in hepatoma                                                                                                                                  | O   | 24  | 43  |
| 77 | H. van der Klift | 2005 | 2p21     | HNPCC  | Molecular Characterization of the Spectrum of Genomic Deletions in the Mismatch Repair Genes <i>MSH2</i> , <i>MLH1</i> , <i>MSH6</i> , and <i>PMS2</i> Responsible for HNPCC <sup>(1)</sup>                      | GCC | 44  | 2   |
| 78 | B. Baysal        | 2004 | 11q23.1  | PGL    | An <i>Alu</i> -mediated partial <i>SDHC</i> deletion causes familial and sporadic paraganglioma                                                                                                                  | JMG | 41  | 9   |
| 79 | U. Guenther      | 2004 | 11q13.3  | SMARD1 | Genomic rearrangements at the <i>IGHMBP2</i> gene locus in two patients with SMARD1                                                                                                                              | HG  | 115 | 4   |
| 80 | C. Hartmann      | 2004 | 17q21.31 | BC     | Large <i>BRCA1</i> Gene Deletions Are Found in 3% of German High-risk Breast Cancer Families                                                                                                                     | HM  | 24  | 6   |
| 81 | F. Laccone       | 2004 | Xq28     | RS     | Large Deletions of the <i>MECP2</i> Gene Detected by Gene Dosage Analysis in Patients With Rett Syndrome                                                                                                         | HM  | 23  | 3   |
| 82 | M. Mitchell      | 2004 | 4q35.2   | FXID   | An <i>Alu</i> -mediated 31.5-kb deletion as the cause of factor XI deficiency in 2 unrelated patients                                                                                                            | B   | 104 | 8   |
| 83 | S. Nakaya        | 2004 | Xq28     | HA     | Severe HA <sup>(1)</sup> due to a 1.3 kb factor VIII gene deletion including exon 24: homologous recombination between 41 bp within an <i>Alu</i> repeat sequence in introns 23 and 24                           | JTH | 2   | 11  |

# Studies Linking *Alu*-related Deletions to Disease Phenotypes

|     |                      |      |           |       |                                                                                                                                                                                           |      |     |    |
|-----|----------------------|------|-----------|-------|-------------------------------------------------------------------------------------------------------------------------------------------------------------------------------------------|------|-----|----|
| 84  | L. Rossetti          | 2004 | Xq28      | HA    | Homologous Recombination Between <i>Alu</i> Sx-Sequences as a Cause of Hemophilia                                                                                                         | HM   | 24  | 5  |
| 85  | C. Silao             | 2004 | 1p21.2    | MSUD  | A novel deletion creating a new terminal exon of the dihydrolipoyl transacylase gene is a founder mutation of Filipino maple syrup urine disease                                          | MGM  | 81  | 2  |
| 86  | I. Tournier          | 2004 | 13q13.1   | BC    | Significant Contribution of Germline <i>BRCA2</i> Rearrangements in Male Breast Cancer Families                                                                                           | CR   | 64  | 22 |
| 87  | M. Venturin          | 2004 | 17q11.2   | NF1   | Evidence for non-homologous end joining and non-allelic homologous recombination in atypical <i>NF1</i> microdeletions                                                                    | HG   | 115 | 1  |
| 88  | C. Bergmann          | 2003 | Xq12      | XMR   | Oligophrenin 1 ( <i>OPHN1</i> ) gene mutation causes syndromic X-linked mental retardation with epilepsy, rostral ventricular enlargement and cerebellar hypoplasia                       | BJN  | 126 | 7  |
| 89  | E. Jo                | 2003 | Xq22.1    | XLA   | Identification of mutations in the Bruton's tyrosine kinase gene, including a novel genomic rearrangements resulting in large deletion, in Korean XLA <sup>(1)</sup> patients             | JHG  | 48  | 6  |
| 90  | V. Ricci             | 2003 | Xq28      | HD    | An <i>Alu</i> -mediated rearrangement as cause of exon skipping in Hunter disease                                                                                                         | HG   | 112 | 4  |
| 91  | R. Shaji             | 2003 | 16p13.3   | HbH   | Determination of the breakpoint and molecular diagnosis of a common $\alpha$ -thalassaemia-1 deletion in the Indian population                                                            | BJH  | 123 | 5  |
| 92  | Y. Wang              | 2003 | 2p21      | HNPCC | Hereditary Nonpolyposis Colorectal Cancer: Frequent Occurrence of Large Genomic Deletions in <i>MSH2</i> and <i>MLH1</i> Genes                                                            | IJC  | 103 | 5  |
| 93  | W. Balemans          | 2002 | 17q21.31  | VBD   | Identification of a 52 kb deletion downstream of the <i>SOST</i> gene in patients with van Buchem disease                                                                                 | JMG  | 39  | 2  |
| 94  | Z. Guo               | 2002 | 9q31.1    | TD    | Double deletions and missense mutations in the first nucleotide-binding fold of the ATP-binding cassette transporter A1 ( <i>ABCA1</i> ) gene in Japanese patients with TD <sup>(1)</sup> | JHG  | 47  | 6  |
| 95  | M. Huber             | 2002 | 10q24-25  | EB    | Deletion of the Cytoplasmic Domain of BP180/Collagen XVII Causes a Phenotype with Predominant Features of Epidermolysis Bullosa Simplex                                                   | JID  | 118 | 1  |
| 96  | M. Lutskiy           | 2002 | Xp11.23   | WAS   | An <i>Alu</i> -mediated <i>deletion</i> at Xp11.23 leading to Wiskott-Aldrich syndrome                                                                                                    | HG   | 110 | 5  |
| 97  | K. Staehling-Hampton | 2002 | 17q12-q21 | VBD   | A 52-kb Deletion in the <i>SOST-MEOX1</i> Intergenic Region on 17q12-q21 Is Associated With van Buchem Disease in the Dutch Population                                                    | AJMG | 110 | 2  |
| 98  | F. Vidal             | 2002 | Xq28      | HA    | First Molecular Characterization of an Unequal Homologous <i>Alu</i> -mediated Recombination Event Responsible for Hemophilia                                                             | JTH  | 88  | 1  |
| 99  | T. Yabe              | 2002 | 6p21.32   | BLS   | A subject with a novel type I bare lymphocyte syndrome has tapasin deficiency due to deletion of 4 exons by <i>Alu</i> -mediated recombination                                            | B    | 100 | 4  |
| 100 | X. Cao               | 2001 | 5q22.2    | FAP   | Topoisomerase-I- and <i>Alu</i> -mediated genomic deletions of the <i>APC</i> gene in familial adenomatous polyposis                                                                      | HG   | 108 | 5  |

# Studies Linking *Alu*-related Deletions to Disease Phenotypes

|     |              |      |          |      |                                                                                                                                                                                                                      |      |     |    |
|-----|--------------|------|----------|------|----------------------------------------------------------------------------------------------------------------------------------------------------------------------------------------------------------------------|------|-----|----|
| 101 | F. Ringpfeil | 2001 | 16p13.11 | PE   | Compound Heterozygosity for a Recurrent 16.5-kb <i>Alu</i> -Mediated Deletion Mutation and Single-Base-Pair Substitutions in the <i>ABCC6</i> Gene Results in PE <sup>(1)</sup>                                      | AJHG | 68  | 3  |
| 102 | T. Wang      | 2001 | 13q13.1  | BC   | A Deletion/Insertion Mutation in the <i>BRCA2</i> Gene in a Breast Cancer Family: A Possible Role of the <i>Alu</i> -polyA Tail in the Evolution of the Deletion                                                     | GCC  | 31  | 1  |
| 103 | S. Dabora    | 2000 | 16p13.3  | TSC  | Characterisation of six large deletions in <i>TSC2</i> identified using long range PCR suggests diverse mechanisms including <i>Alu</i> mediated recombination                                                       | JMG  | 37  | 11 |
| 104 | M. Hiltunen  | 2000 | 14q24.2  | EOAD | Identification of novel 4.6-kb genomic deletion in presenilin-1 gene which results in exclusion of exon 9 in a Finnish early onset Alzheimer's disease family: an <i>Alu</i> core sequence-stimulated recombination? | EJHG | 8   | 4  |
| 105 | Y. Koda      | 2000 | 19q13.33 | BP   | An <i>Alu</i> -mediated large deletion of the <i>FUT2</i> gene in individuals with the ABO-Bombay phenotype                                                                                                          | HG   | 106 | 1  |
| 106 | E. Rohlfs    | 2000 | 17q21.31 | BC   | An <i>Alu</i> -Mediated 7.1 kb Deletion of <i>BRCA1</i> Exons 8 and 9 in Breast and Ovarian Cancer Families That Results in Alternative Splicing of Exon 10                                                          | GCC  | 28  | 3  |
| 107 | Y. Saikawa   | 2000 | 22q12.3  | HO-1 | Structural Evidence of Genomic Exon-Deletion Mediated by <i>Alu-Alu</i> Recombination in a Human Case with Heme Oxygenase-1 Deficiency                                                                               | HM   | 16  | 2  |
| 108 | R. Suminaga  | 2000 | Xp21.1-2 | DMD  | Non-homologous recombination between <i>Alu</i> and LINE-1 repeats caused a 430-kb deletion in the dystrophin gene: a novel source of genomic instability                                                            | JHG  | 45  | 6  |

(1)

## Phenotype Abbreviations

|          |                                                      |
|----------|------------------------------------------------------|
| ADH -    | Autosomal Dominant Hypercholesterolemia              |
| AHC -    | Congenital Adrenal Hypoplasia                        |
| AIP -    | Acute Intermittent Porphyria                         |
| ARNSHI - | Autosomal Recessive Non-Syndromic Hearing Impairment |
| ARO -    | Autosomal Recessive Osteopetrosis                    |
| ARPKD -  | Autosomal Recessive Polycystic Kidney Disease        |
| AT I -   | Antithrombin Deficiency Type I                       |
| BC -     | Breast Cancer                                        |

# Studies Linking *Alu*-related Deletions to Disease Phenotypes

|          |                                                                             |
|----------|-----------------------------------------------------------------------------|
| BLS -    | Type I Bare Lymphocyte Syndrome                                             |
| BP -     | Bombay Phenotype                                                            |
| BS -     | Barth Syndrome                                                              |
| C -      | Cancer                                                                      |
| CC -     | Congenital Cataracts                                                        |
| CGD -    | Chronic Granulomatous Disease                                               |
| ChAc -   | Chorea-acanthocytosis                                                       |
| DD -     | Danon Disease                                                               |
| DGS -    | DiGeorge Syndrome (in paper #20, LCR22's are related to 3 other phenotypes) |
| DMD -    | Duchenne Muscular Dystrophy                                                 |
| EA II -  | Episodic Ataxia Type 2                                                      |
| EB -     | Epidermolysis Bullosa Simplex                                               |
| EDS -    | Ehlers-Danlos Syndrome                                                      |
| EOAD -   | Early Onset Alzheimer's Disease                                             |
| FAP -    | Familial Adenomatous Polyposis                                              |
| FD -     | Fabry Disease                                                               |
| FVD -    | Factor V Deficiency                                                         |
| FXID -   | Factor XI Deficiency                                                        |
| GD -     | Gaucher Disease                                                             |
| HA -     | Hemophilia A                                                                |
| HbH -    | Haemoglobin H Disease                                                       |
| HCC -    | Hepatocellular Carcinoma                                                    |
| HCM -    | Hypertrophic Cardiomyopathy                                                 |
| HCP -    | Hereditary Coproporphyrria (other phenotypes mentioned in paper 34)         |
| HD -     | Hunter Disease                                                              |
| HDGC -   | Hereditary Diffuse Gastric Cancer                                           |
| HDR -    | HDR Syndrome (Hypoparathyroidism, Sensorineural Deafness, Renal Dysplasia)  |
| HNPPCC - | Hereditary Non-Polyposis Colorectal Cancer                                  |
| HNPP -   | Hereditary Neuropathy with Liability to Pressure Palsies                    |
| HY -     | Hypotrichosis                                                               |
| KS -     | Kindler Syndrome                                                            |
| L -      | Leukemia                                                                    |
| LCAH -   | Lipoid Congenital Adrenal Hyperplasia                                       |
| LFS -    | Li-Fraumeni Syndrome                                                        |
| LPL -    | Lipoprotein Lipase Deficiency                                               |



# Studies Linking *Alu*-related Deletions to Disease Phenotypes

|          |                                                                                     |
|----------|-------------------------------------------------------------------------------------|
| LS -     | Lynch Syndrome                                                                      |
| M -      | Microcephaly (in paper #14, other phenotypes related to 6q deletions are mentioned) |
| MEN I -  | Multiple Endocrine Neoplasia Type I                                                 |
| ML II -  | Mucopolidosis Type II $\alpha/\beta$                                                |
| MO -     | Multiple Osteochondromas                                                            |
| MPS II - | Mucopolysaccharidosis Type II                                                       |
| MSUD -   | Maple Syrup Urine Disease                                                           |
| N -      | Neuropathy                                                                          |
| NF1 -    | Neurofibromatosis Type I                                                            |
| OTCD -   | Ornithine Transcarbamylase Deficiency                                               |
| PA -     | Propionic Acidemia                                                                  |
| PE -     | Pseudoxanthoma Elasticum                                                            |
| PGL -    | Paranglioma                                                                         |
| PJS -    | Peutz-Jeghers Syndrome                                                              |
| RP -     | Retinitis Pigmentosa                                                                |
| RPA -    | Retinitis Punctata Albescens                                                        |
| RS -     | Rett Syndrome                                                                       |
| RTT -    | Rett Syndrome                                                                       |
| SCN -    | Severe Congenital Neutropenia                                                       |
| SDS -    | Shwachman-Diamond Syndrome                                                          |
| SMARD1 - | Spinal Muscular atrophy with Respiratory Distress Type I                            |
| SPG 11 - | Spastic Paraplegia Type 11                                                          |
| SPG IV - | Spastic Paraplegia Type IV                                                          |
| SS -     | Sotos Syndrome                                                                      |
| SS B -   | Sanfilippo Syndrome Type B                                                          |
| T II -   | Tyrosinaemia Type II                                                                |
| T2D -    | T2-Deficiency                                                                       |
| T-ALL -  | T-cell Acute Lymphoblastic Leukemia                                                 |
| TD -     | Tangier Disease                                                                     |
| TSC -    | Tuberous Sclerosis Complex                                                          |
| VBD -    | van Buchem Disease                                                                  |
| VHL -    | Von Hippel-Lindau Disease                                                           |
| VWD -    | von Willebrand Disease                                                              |
| WAS -    | Wiskott-Aldrich syndrome                                                            |
| WS IV -  | Waardenburg Syndrome type IV                                                        |

# Studies Linking *Alu*-related Deletions to Disease Phenotypes

|              |                             |
|--------------|-----------------------------|
| XLA -        | X-linked Agammaglobulinemia |
| XLG -        | X-linked Liver Glycogenosis |
| XMR -        | X-Linked Mental Retardation |
| $\alpha$ T - | Alpha-thalassemia           |

(2)

## Journal Titles

|         |                                               |
|---------|-----------------------------------------------|
| AJHG -  | <i>The American Journal of Human Genetics</i> |
| AJMG -  | <i>American Journal of Medical Genetics</i>   |
| B -     | <i>Blood</i>                                  |
| BCMD-   | <i>Blood Cells, Molecules, and Diseases</i>   |
| BCRT -  | <i>Breast Cancer Research and Treatment</i>   |
| BJH -   | <i>British Journal of Haematology</i>         |
| BJN -   | <i>Brain. A Journal of Neurology</i>          |
| BMCC -  | <i>BioMed Central Cancer</i>                  |
| BMCG -  | <i>BioMed Central Genomics</i>                |
| BMCMG - | <i>BioMed Central Medical Genetics</i>        |
| BRI -   | <i>BioMed Research International</i>          |
| CCA -   | <i>Clinica Chimica Acta</i>                   |
| CCG -   | <i>Circulation. Cardiovascular Genetics.</i>  |
| CE -    | <i>Clinical Endocrinology</i>                 |
| CG -    | <i>Clinical Genetics</i>                      |
| CGC -   | <i>Cancer Genetics and Cytogenetics</i>       |
| CGR -   | <i>Cytogenetic and Genome Research</i>        |
| CPR -   | <i>Cancer Prevention Research</i>             |
| CR -    | <i>Cancer Research</i>                        |
| ED -    | <i>Experimental Dermatology</i>               |
| EJC -   | <i>European Journal of Cancer</i>             |
| EJHG -  | <i>European Journal of Human Genetics</i>     |
| EJMG -  | <i>European Journal of Medical Genetics</i>   |
| FN -    | <i>Frontiers in Neurology</i>                 |

# Studies Linking *Alu*-related Deletions to Disease Phenotypes

|         |                                                              |
|---------|--------------------------------------------------------------|
| G -     | <i>Gastroenterology</i>                                      |
| GCC -   | <i>Genes, Chromosomes &amp; Cancer</i>                       |
| GE -    | <i>Gene</i>                                                  |
| GM -    | <i>Genetics in Medicine</i>                                  |
| HG -    | <i>Human Genetics</i>                                        |
| HGVS -  | <i>Human Genome Variation Society</i>                        |
| HM -    | <i>Human Mutation</i>                                        |
| HMG -   | <i>Human Molecular Genetics</i>                              |
| IJC -   | <i>International Journal of Cancer</i>                       |
| IOVS -  | <i>Investigative Ophthalmology and Visual Science</i>        |
| JBMR -  | <i>Journal of Bone and Mineral Research</i>                  |
| JHG -   | <i>Journal of Human Genetics</i>                             |
| JID -   | <i>The Journal of Investigative Dermatology</i>              |
| JIMD -  | <i>Journal of Inherited Metabolic Disease</i>                |
| JJCO -  | <i>Japanese Journal of Clinical Oncology</i>                 |
| JMG -   | <i>Journal of Medical Genetics</i>                           |
| JSBMB - | <i>Journal of Steroid Biochemistry and Molecular Biology</i> |
| JTH-    | <i>Journal of Thrombosis and Haemostasis</i>                 |
| MGM -   | <i>Molecular Genetics and Metabolism</i>                     |
| MR -    | <i>Mutation Research</i>                                     |
| N -     | <i>Neurogenetics</i>                                         |
| NG -    | <i>Nature Genetics</i>                                       |
| O -     | <i>Oncogene</i>                                              |
| T -     | <i>Transfusion</i>                                           |

=====
