# Supplementary material for: A Comparison of 100 Human Genes Using an Alu Element-Based Instability Model
Source: PubMed Central journal article supplement (PMC3670932; doi:10.1371/journal.pone.0065188), 2013-06-03
Supplement: pone.0065188.s003.pdf [file pone.0065188.s003.pdf]

## Characteristics of 50 deletion-prone human cancer genes

| Gene    | Locus                         | Coding Region<br>Length<br>(bp) | Coding<br>Exons | <u>Alu Population Across Alu Landscape</u> |      |                        | <u>Raw Stability Scores</u> |                                     |         |                        |
|---------|-------------------------------|---------------------------------|-----------------|--------------------------------------------|------|------------------------|-----------------------------|-------------------------------------|---------|------------------------|
|         |                               |                                 |                 | 250 kbp<br>5' Flanking                     | Gene | 250 kbp<br>3' Flanking | Total                       | <u>Coding Exon Scores</u><br>Lowest | Highest | <u>Gene<br/>Scores</u> |
| APC     | chr5:112,073,556-112,181,936  | 136,409                         | 14              | 77                                         | 68   | 191                    | 336                         | 0.902                               | 0.975   | 0.709                  |
| ARID1A  | chr1:27,022,522-27,108,601    | 84,353                          | 20              | 375                                        | 76   | 324                    | 775                         | 0.903                               | 0.944   | 0.755                  |
| ATM     | chr1:108,093,559-108,239,826  | 137,884                         | 62              | 262                                        | 82   | 193                    | 537                         | 0.767                               | 0.970   | 0.359                  |
| BRCA1   | chr17:41,196,312-41,277,500   | 78,419                          | 22              | 298                                        | 138  | 325                    | 761                         | 0.808                               | 0.903   | 0.357                  |
| BRCA2   | chr13:32,889,617-32,973,809   | 82,310                          | 26              | 89                                         | 55   | 182                    | 326                         | 0.917                               | 0.964   | 0.610                  |
| BUB1B   | chr15:40,453,210-40,513,337   | 59,939                          | 23              | 130                                        | 60   | 127                    | 317                         | 0.869                               | 0.951   | 0.593                  |
| CASP8   | chr2:202,122,754-202,152,434  | 20,108                          | 8               | 271                                        | 19   | 76                     | 366                         | 0.806                               | 0.949   | 0.749                  |
| CDKN1B  | chr12:12,870,302-12,875,305   | 1,107                           | 2               | 186                                        | 0    | 269                    | 455                         | 0.925                               | 0.953   | 0.952                  |
| CDKN2A  | chr9:21,967,751-21,994,490    | 6,599                           | 3               | 51                                         | 6    | 57                     | 114                         | 0.977                               | 0.984   | 0.971                  |
| CDKN2C  | chr1:51,435,642-51,440,309    | 3,902                           | 2               | 145                                        | 0    | 241                    | 386                         | 0.947                               | 0.967   | 0.965                  |
| CYLD    | chr16:50,775,961-50,835,846   | 46,810                          | 16              | 77                                         | 13   | 69                     | 159                         | 0.942                               | 0.987   | 0.886                  |
| DICER1  | chr14:95,552,565-95,608,085   | 42,961                          | 26              | 81                                         | 6    | 82                     | 169                         | 0.964                               | 0.992   | 0.941                  |
| FANCA   | chr16:89,803,959-89,883,065   | 78,015                          | 43              | 252                                        | 125  | 277                    | 654                         | 0.832                               | 0.911   | 0.301                  |
| FANCB   | chrX:14,861,529-14,891,184    | 21,944                          | 8               | 63                                         | 7    | 29                     | 99                          | 0.974                               | 0.991   | 0.949                  |
| FANCD2  | chr3:10,068,113-10,141,344    | 70,293                          | 42              | 264                                        | 80   | 301                    | 645                         | 0.847                               | 0.925   | 0.410                  |
| FBXO11  | chr2:48,034,059-48,132,932    | 31,632                          | 22              | 116                                        | 101  | 245                    | 462                         | 0.879                               | 0.934   | 0.671                  |
| FBXW7   | chr4:153,242,410-153,456,185  | 88,923                          | 11              | 132                                        | 73   | 79                     | 284                         | 0.985                               | 0.990   | 0.968                  |
| FH      | chr1:241,660,857-241,683,085  | 21,895                          | 10              | 116                                        | 4    | 69                     | 189                         | 0.973                               | 0.989   | 0.949                  |
| GPC3    | chrX:132,669,776-133,119,673  | 449,325                         | 10              | 110                                        | 175  | 190                    | 475                         | 0.957                               | 0.979   | 0.821                  |
| IKZF1   | chr7:50,344,378-50,472,798    | 109,668                         | 7               | 45                                         | 7    | 54                     | 106                         | 0.993                               | 0.997   | 0.988                  |
| KDM6A   | chrX:44,732,423-44,971,845    | 237,859                         | 29              | 338                                        | 138  | 62                     | 538                         | 0.942                               | 0.982   | 0.731                  |
| MAP2K4  | chr17:11,924,135-12,047,051   | 120,374                         | 11              | 134                                        | 7    | 149                    | 290                         | 0.968                               | 0.983   | 0.904                  |
| MAP3K1  | chr5:56,110,900-56,191,978    | 78,107                          | 20              | 60                                         | 28   | 204                    | 292                         | 0.951                               | 0.985   | 0.933                  |
| MAP3K13 | chr3:185,080,836-185,206,882  | 53,875                          | 13              | 152                                        | 80   | 263                    | 495                         | 0.913                               | 0.952   | 0.729                  |
| MEN1    | chr1:64,570,986-64,578,188    | 5,776                           | 9               | 276                                        | 2    | 96                     | 374                         | 0.916                               | 0.948   | 0.909                  |
| MLH1    | chr3:37,034,841-37,092,337    | 57,106                          | 19              | 131                                        | 43   | 216                    | 390                         | 0.904                               | 0.954   | 0.695                  |
| MSH2    | chr2:47,630,263-47,710,360    | 79,578                          | 16              | 285                                        | 105  | 169                    | 559                         | 0.856                               | 0.943   | 0.537                  |
| NCOR1   | chr17:15,933,408-16,118,874   | 162,274                         | 45              | 376                                        | 141  | 208                    | 725                         | 0.905                               | 0.962   | 0.510                  |
| NF1     | chr17:29,421,945-29,704,695   | 278,846                         | 58              | 327                                        | 172  | 208                    | 707                         | 0.929                               | 0.977   | 0.592                  |
| NF2     | chr22:29,999,545-30,094,589   | 90,804                          | 16              | 324                                        | 86   | 246                    | 656                         | 0.894                               | 0.952   | 0.685                  |
| PAX5    | chr9:36,838,531-37,034,476    | 193,472                         | 10              | 171                                        | 54   | 142                    | 367                         | 0.972                               | 0.991   | 0.910                  |
| PBRM1   | chr3:52,579,368-52,713,739    | 131,649                         | 29              | 150                                        | 156  | 102                    | 408                         | 0.867                               | 0.938   | 0.376                  |
| PRDM1   | chr6:106,534,195-106,557,814  | 20,933                          | 7               | 119                                        | 5    | 119                    | 234                         | 0.970                               | 0.981   | 0.954                  |
| PTGFRN  | chr1:117,452,689-117,532,972  | 76,764                          | 9               | 118                                        | 18   | 106                    | 242                         | 0.967                               | 0.986   | 0.930                  |
| RB1     | chr13:48,877,883-49,056,026   | 176,159                         | 27              | 145                                        | 57   | 72                     | 274                         | 0.922                               | 0.989   | 0.774                  |
| SBDS    | chr7:66,452,690-66,460,588    | 7,047                           | 5               | 253                                        | 9    | 360                    | 622                         | 0.861                               | 0.902   | 0.787                  |
| SDHD    | chr1:111,957,571-111,966,518  | 8,063                           | 4               | 195                                        | 8    | 157                    | 360                         | 0.910                               | 0.950   | 0.888                  |
| SMARCB1 | chr22:24,129,150-24,176,705   | 47,011                          | 9               | 253                                        | 61   | 213                    | 527                         | 0.946                               | 0.969   | 0.748                  |
| SMARCD1 | chr12:50,478,983-50,494,494   | 13,631                          | 13              | 170                                        | 13   | 373                    | 556                         | 0.874                               | 0.950   | 0.854                  |
| SMAD4   | chr18:48,556,583-48,611,411   | 31,421                          | 11              | 201                                        | 32   | 154                    | 387                         | 0.905                               | 0.947   | 0.881                  |
| SPRED1  | chr15:38,545,052-38,649,450   | 98,479                          | 7               | 81                                         | 29   | 67                     | 177                         | 0.974                               | 0.986   | 0.938                  |
| STK11   | chr19:1,205,798-1,228,434     | 19,734                          | 9               | 261                                        | 17   | 215                    | 493                         | 0.918                               | 0.956   | 0.874                  |
| SUFU    | chr10:104,263,719-104,393,214 | 126,003                         | 12              | 263                                        | 128  | 286                    | 677                         | 0.913                               | 0.957   | 0.781                  |
| TBX3    | chr12:115,108,059-115,121,969 | 11,360                          | 7               | 232                                        | 0    | 182                    | 414                         | 0.967                               | 0.969   | 0.963                  |
| TNFAIP3 | chr6:138,188,581-138,204,449  | 10,092                          | 8               | 82                                         | 2    | 82                     | 166                         | 0.977                               | 0.985   | 0.969                  |
| TP53    | chr17:7,571,720-7,590,863     | 6,986                           | 10              | 193                                        | 33   | 313                    | 539                         | 0.873                               | 0.895   | 0.791                  |
| TRIM36  | chr5:114,460,459-114,516,243  | 53,535                          | 10              | 46                                         | 22   | 51                     | 119                         | 0.969                               | 0.988   | 0.912                  |
| TSC1    | chr9:135,766,735-135,820,020  | 32,638                          | 21              | 174                                        | 23   | 159                    | 356                         | 0.928                               | 0.967   | 0.838                  |
| TSC2    | chr16:2,097,990-2,138,713     | 39,995                          | 41              | 275                                        | 25   | 218                    | 518                         | 0.910                               | 0.972   | 0.749                  |
| VHL     | chr3:10,183,319-10,195,354    | 8,118                           | 3               | 292                                        | 21   | 213                    | 526                         | 0.871                               | 0.853   | 0.812                  |
