# Supplementary material for: A Comparison of 100 Human Genes Using an Alu Element-Based Instability Model
Source: PubMed Central journal article supplement (PMC3670932; doi:10.1371/journal.pone.0065188), 2013-06-03
Supplement: pone.0065188.s004.pdf [file pone.0065188.s004.pdf]

## Characteristics of 50 randomly chosen human genes

| Gene     | Locus                         | Coding Region |              | <i>Alu</i> Population Across <i>Alu</i> Landscape |      |                     |       | Raw Stability Scores      |                            |            |
|----------|-------------------------------|---------------|--------------|---------------------------------------------------|------|---------------------|-------|---------------------------|----------------------------|------------|
|          |                               | Length (bp)   | Coding Exons | 250 kbp 5' Flanking                               | Gene | 250 kbp 3' Flanking | Total | Coding Exon Scores Lowest | Coding Exon Scores Highest | Gene Score |
| ADGB     | chr6:146,920,136-147,136,597  | 216,177       | 36           | 30                                                | 48   | 48                  | 126   | 0.954                     | 0.995                      | 0.779      |
| ARSH     | chrX:2,924,654-2,951,426      | 26,773        | 9            | 239                                               | 28   | 158                 | 425   | 0.884                     | 0.935                      | 0.726      |
| BLK      | chr8:11,351,521-11,422,108    | 20,884        | 12           | 80                                                | 24   | 101                 | 205   | 0.969                     | 0.987                      | 0.950      |
| C19orf76 | chr19:50,191,942-50,194,247   | 656           | 2            | 361                                               | 0    | 300                 | 661   | 0.925                     | 0.928                      | 0.925      |
| CDH13    | chr16:82,660,399-83,830,215   | 1,167,938     | 15           | 41                                                | 317  | 129                 | 487   | 0.954                     | 0.994                      | 0.802      |
| CHAMP1   | chr13:115,079,965-115,092,803 | 2,439         | 1            | 95                                                | 9    | 6                   | 110   | only coding exon = 0.968  |                            |            |
| CHRNA1   | chr2:175,612,323-175,629,200  | 16,271        | 10           | 99                                                | 9    | 120                 | 228   | 0.949                     | 0.979                      | 0.911      |
| CHST9    | chr18:24,495,595-24,765,289   | 226,551       | 5            | 60                                                | 47   | 82                  | 189   | 0.979                     | .994                       | 0.959      |
| CYB5B    | chr16:69,458,498-69,500,167   | 37,835        | 3            | 350                                               | 38   | 285                 | 673   | 0.906                     | 0.934                      | 0.828      |
| DCAF6    | chr1:167,905,797-168,045,083  | 138,524       | 19           | 201                                               | 67   | 147                 | 415   | 0.930                     | 0.978                      | 0.773      |
| DTNBP1   | chr6:15,523,032-15,663,289    | 139,895       | 10           | 158                                               | 16   | 129                 | 303   | 0.943                     | 0.983                      | 0.841      |
| GDPD2    | chrX:69,642,881-69,653,241    | 8,102         | 16           | 142                                               | 2    | 185                 | 329   | 0.072                     | 0.966                      | 0.071      |
| GFI1     | chr1:92,940,318-92,951,628    | 7,459         | 6            | 130                                               | 3    | 117                 | 250   | 0.946                     | 0.967                      | 0.938      |
| GRPEL2   | chr5:148,724,977-148,734,146  | 5,743         | 4            | 59                                                | 6    | 236                 | 301   | 0.928                     | 0.964                      | 0.913      |
| H2AFB3   | chrX:154,113,317-154,113,833  | 348           | 1            | 92                                                | 0    | 76                  | 168   | only coding exon = 0.986  |                            |            |
| HDGFL1   | chr6:22,569,678-22,570,750    | 756           | 1            | 60                                                | 0    | 39                  | 99    | only coding exon = 0.995  |                            |            |
| HSPB9    | chr17:40,274,756-40,275,371   | 480           | 1            | 289                                               | 0    | 285                 | 574   | only coding exon = 0.911  |                            |            |
| IL17D    | chr13:21,277,482-21,297,237   | 17,953        | 2            | 194                                               | 9    | 257                 | 460   | 0.955                     | 0.961                      | 0.940      |
| JMY      | chr5:78,531,925-78,623,038    | 79,657        | 10           | 212                                               | 92   | 189                 | 493   | 0.896                     | 0.949                      | 0.726      |
| KCNA6    | chr12:4,918,342-4,960,278     | 1,590         | 1            | 81                                                | 9    | 43                  | 133   | only coding exon = 0.991  |                            |            |
| KEAP1    | chr19:10,596,796-10,614,054   | 13,382        | 5            | 493                                               | 43   | 454                 | 990   | 0.784                     | 0.830                      | 0.621      |
| KIAA1598 | chr10:118,644,306-118,765,088 | 118,736       | 15           | 140                                               | 44   | 96                  | 280   | 0.946                     | 0.986                      | 0.821      |
| MADCAM1  | chr19:496,490-505,343         | 8,466         | 5            | 163                                               | 11   | 268                 | 442   | 0.897                     | 0.940                      | 0.861      |
| MAP9     | chr4:156,263,812-156,298,122  | 28,068        | 13           | 81                                                | 6    | 34                  | 121   | 0.972                     | 0.989                      | 0.934      |
| MFSD4    | chr1:205,538,112-205,572,046  | 31,392        | 10           | 153                                               | 14   | 192                 | 359   | 0.943                     | 0.969                      | 0.882      |
| MIA3     | chr1:222,791,444-222,841,351  | 47,509        | 28           | 132                                               | 16   | 126                 | 274   | 0.960                     | 0.980                      | 0.885      |
| MRPS9    | chr2:105,654,483-105,716,418  | 61,667        | 11           | 64                                                | 17   | 91                  | 172   | 0.976                     | 0.989                      | 0.942      |
| MUT      | chr6:49,398,073-49,431,041    | 27,739        | 12           | 100                                               | 8    | 41                  | 149   | 0.969                     | 0.990                      | 0.951      |
| NANOS3   | chr19:13,988,063-13,991,571   | 3,255         | 2            | 429                                               | 6    | 393                 | 828   | 0.872                     | 0.896                      | 0.858      |
| NCF1     | chr7:74,188,309-74,203,659    | 15,126        | 11           | 432                                               | 21   | 466                 | 919   | 0.876                     | 0.893                      | 0.723      |
| NGB      | chr14:77,731,834-77,737,655   | 4,402         | 4            | 215                                               | 1    | 152                 | 368   | 0.974                     | 0.978                      | 0.970      |
| OPRD1    | chr1:29,138,654-29,190,208    | 50,900        | 3            | 473                                               | 72   | 301                 | 846   | 0.898                     | 0.928                      | 0.844      |
| OR6P1    | chr1:158,532,441-158,533,394  | 954           | 1            | 36                                                | 0    | 42                  | 78    | only coding exon = 0.993  |                            |            |
| PACSL1   | chr6:34,482,649-34,504,039    | 6,225         | 9            | 323                                               | 0    | 320                 | 643   | 0.950                     | 0.951                      | 0.973      |
| PATE4    | chr11:125,703,211-125,709,967 | 5,068         | 3            | 95                                                | 0    | 110                 | 205   | 0.980                     | 0.988                      | 0.977      |
| PHKA2    | chrX:18,910,416-19,002,480    | 90,448        | 33           | 147                                               | 47   | 187                 | 381   | 0.898                     | 0.971                      | 0.724      |
| PSG2     | chr19:43,568,362-43,586,893   | 16,013        | 5            | 47                                                | 3    | 71                  | 121   | 0.971                     | 0.990                      | 0.961      |
| SET      | chr9:131,451,509-131,458,675  | 10,769        | 8            | 403                                               | 2    | 377                 | 782   | 0.872                     | 0.907                      | 0.821      |
| SF3B3    | chr16:70,557,691-70,611,571   | 45,157        | 25           | 447                                               | 64   | 168                 | 679   | 0.840                     | 0.926                      | 0.499      |
| SFRP5    | chr10:99,526,508-99,531,756   | 4,320         | 3            | 80                                                | 1    | 257                 | 338   | 0.960                     | 0.965                      | 0.952      |
| SPATA7   | chr14:88,851,742-88,904,804   | 52,604        | 12           | 75                                                | 20   | 164                 | 259   | 0.968                     | 0.980                      | 0.924      |
| TAGLN2   | chr1:159,887,903-159,895,284  | 1,710         | 4            | 80                                                | 0    | 58                  | 138   | 0.984                     | 0.987                      | 0.984      |
| THYN1    | chr11:134,118,173-134,123,260 | 4,445         | 7            | 62                                                | 0    | 108                 | 170   | 0.906                     | 0.913                      | 0.978      |
| TMEM136  | chr11:120,195,838-120,204,388 | 3,140         | 3            | 73                                                | 2    | 129                 | 204   | 0.975                     | 0.979                      | 0.973      |
| TRNP1    | chr1:27,320,195-27,327,377    | 684           | 1            | 317                                               | 4    | 334                 | 655   | only coding exon = 0.917  |                            |            |
| TUBA1C   | chr12:49,658,865-49,667,113   | 8,046         | 4            | 333                                               | 9    | 307                 | 649   | 0.873                     | 0.899                      | 0.817      |
| USMG5    | chr10:105,148,809-105,156,270 | 264           | 2            | 168                                               | 8    | 376                 | 552   | 0.893                     | 0.902                      | 0.892      |
| XPNPEP3  | chr22:41,253,085-41,328,823   | 69,254        | 10           | 332                                               | 109  | 416                 | 857   | 0.859                     | 0.926                      | 0.563      |
| ZNF296   | chr19:45,574,758-45,579,688   | 4,773         | 3            | 333                                               | 6    | 407                 | 746   | 0.896                     | 0.917                      | 0.885      |
| ZNF567   | chr19:37,180,303-37,212,225   | 8,199         | 3            | 282                                               | 29   | 270                 | 581   | 0.888                     | 0.917                      | 0.853      |
