# Supplementary material for: A Comparison of 100 Human Genes Using an Alu Element-Based Instability Model
Source: PubMed Central journal article supplement (PMC3670932; doi:10.1371/journal.pone.0065188), 2013-06-03
Supplement: pone.0065188.s005.pdf [file pone.0065188.s005.pdf]

**Table S5****Spacer size percentile samples sizes versus APSN for Type 1 *Alu* pairs**

| APSN | Percentile <sup>(1)</sup> |                  |                  |                  |                  |                  |                  |                  |                  |                  |
|------|---------------------------|------------------|------------------|------------------|------------------|------------------|------------------|------------------|------------------|------------------|
|      | 2.5 <sup>th</sup>         | 10 <sup>th</sup> | 20 <sup>th</sup> | 30 <sup>th</sup> | 40 <sup>th</sup> | 50 <sup>th</sup> | 60 <sup>th</sup> | 70 <sup>th</sup> | 80 <sup>th</sup> | 90 <sup>th</sup> |
| 1    | 2,611                     | 5,263            | 5,307            | 5,263            | 5,317            | 5,287            | 5,255            | 5,316            | 5,274            | 5,299            |
| 2    | 4,643                     | 9,297            | 9,406            | 9,358            | 9,410            | 9,340            | 9,360            | 9,365            | 9,358            | 9,375            |
| 3    | 5,475                     | 11,050           | 11,130           | 11,047           | 11,060           | 11,108           | 11,051           | 11,068           | 11,076           | 11,061           |
| 4    | 5,765                     | 11,675           | 11,681           | 11,704           | 11,716           | 11,720           | 11,690           | 11,713           | 11,694           | 11,685           |
| 5    | 5,952                     | 12,026           | 12,028           | 12,029           | 12,060           | 12,003           | 12,082           | 12,048           | 12,039           | 12,042           |
| 6    | 6,027                     | 12,216           | 12,198           | 12,223           | 12,229           | 12,272           | 12,140           | 12,289           | 12,210           | 12,186           |
| 7    | 6,102                     | 12,244           | 12,284           | 12,240           | 12,291           | 12,276           | 12,306           | 12,260           | 12,294           | 12,271           |
| 8    | 6,084                     | 12,383           | 12,344           | 12,342           | 12,391           | 12,322           | 12,363           | 12,340           | 12,333           | 12,372           |
| 9    | 6,139                     | 12,425           | 12,430           | 12,444           | 12,382           | 12,434           | 12,388           | 12,445           | 12,422           | 12,436           |
| 10   | 6,112                     | 12,435           | 12,455           | 12,422           | 12,417           | 12,435           | 12,407           | 12,428           | 12,403           | 12,440           |
| 11   | 6,163                     | 12,379           | 12,401           | 12,485           | 12,434           | 12,372           | 12,455           | 12,418           | 12,465           | 12,371           |
| 12   | 6,195                     | 12,479           | 12,451           | 12,460           | 12,488           | 12,471           | 12,520           | 12,467           | 12,463           | 12,496           |
| 13   | 6,141                     | 12,463           | 12,417           | 12,409           | 12,487           | 12,432           | 12,439           | 12,458           | 12,423           | 12,455           |
| 14   | 6,141                     | 12,424           | 12,448           | 12,453           | 12,448           | 12,411           | 12,390           | 12,464           | 12,429           | 12,453           |
| 15   | 6,164                     | 12,400           | 12,440           | 12,412           | 12,417           | 12,461           | 12,420           | 12,463           | 12,408           | 12,427           |
| 16   | 6,108                     | 12,467           | 12,422           | 12,488           | 12,444           | 12,446           | 12,491           | 12,450           | 12,444           | 12,479           |
| 17   | 6,121                     | 12,512           | 12,423           | 12,463           | 12,498           | 12,413           | 12,475           | 12,471           | 12,481           | 12,462           |
| 18   | 6,107                     | 12,470           | 12,400           | 12,446           | 12,429           | 12,458           | 12,392           | 12,481           | 12,408           | 12,434           |
| 19   | 6,131                     | 12,399           | 12,415           | 12,414           | 12,405           | 12,424           | 12,357           | 12,413           | 12,470           | 12,387           |
| 20   | 6,176                     | 12,417           | 12,438           | 12,478           | 12,481           | 12,413           | 12,477           | 12,433           | 12,463           | 12,470           |
| 21   | 6,150                     | 12,415           | 12,443           | 12,413           | 12,400           | 12,472           | 12,441           | 12,409           | 12,451           | 12,423           |
| 22   | 6,095                     | 12,404           | 12,394           | 12,431           | 12,320           | 12,430           | 12,357           | 12,415           | 12,427           | 12,351           |
| 23   | 6,113                     | 12,411           | 12,386           | 12,425           | 12,357           | 12,448           | 12,360           | 12,415           | 12,428           | 12,391           |

| APSN | Percentile <sup>(1)</sup> |                  |                  |                  |                  |                  |                  |                  |                  |                  |
|------|---------------------------|------------------|------------------|------------------|------------------|------------------|------------------|------------------|------------------|------------------|
|      | 2.5 <sup>th</sup>         | 10 <sup>th</sup> | 20 <sup>th</sup> | 30 <sup>th</sup> | 40 <sup>th</sup> | 50 <sup>th</sup> | 60 <sup>th</sup> | 70 <sup>th</sup> | 80 <sup>th</sup> | 90 <sup>th</sup> |
| 24   | 6,150                     | 12,411           | 12,460           | 12,422           | 12,429           | 12,434           | 12,398           | 12,479           | 12,412           | 12,479           |
| 25   | 6,120                     | 12,418           | 12,415           | 12,363           | 12,373           | 12,473           | 12,359           | 12,415           | 12,390           | 12,438           |
| 26   | 6,115                     | 12,406           | 12,377           | 12,383           | 12,403           | 12,370           | 12,406           | 12,365           | 12,421           | 12,360           |
| 27   | 6,142                     | 12,361           | 12,425           | 12,388           | 12,449           | 12,403           | 12,383           | 12,438           | 12,420           | 12,361           |
| 28   | 6,103                     | 12,419           | 12,412           | 12,417           | 12,415           | 12,405           | 12,400           | 12,402           | 12,400           | 12,421           |
| 29   | 6,114                     | 12,347           | 12,394           | 12,401           | 12,386           | 12,400           | 12,363           | 12,345           | 12,389           | 12,401           |
| 30   | 6,126                     | 12,356           | 12,354           | 12,332           | 12,359           | 12,354           | 12,392           | 12,302           | 12,414           | 12,331           |
| 31   | 6,123                     | 12,368           | 12,395           | 12,340           | 12,425           | 12,401           | 12,363           | 12,387           | 12,392           | 12,399           |
| 32   | 6,089                     | 12,364           | 12,402           | 12,353           | 12,376           | 12,379           | 12,410           | 12,353           | 12,348           | 12,385           |
| 33   | 6,049                     | 12,470           | 12,428           | 12,382           | 12,354           | 12,435           | 12,399           | 12,394           | 12,395           | 12,408           |
| 34   | 6,080                     | 12,427           | 12,406           | 12,390           | 12,352           | 12,435           | 12,381           | 12,445           | 12,365           | 12,427           |
| 35   | 6,099                     | 12,336           | 12,358           | 12,377           | 12,366           | 12,348           | 12,353           | 12,337           | 12,370           | 12,315           |
| 36   | 6,137                     | 12,315           | 12,438           | 12,396           | 12,349           | 12,346           | 12,430           | 12,374           | 12,392           | 12,396           |
| 37   | 6,101                     | 12,393           | 12,370           | 12,373           | 12,385           | 12,378           | 12,394           | 12,395           | 12,385           | 12,360           |
| 38   | 6,076                     | 12,398           | 12,357           | 12,370           | 12,396           | 12,376           | 12,346           | 12,371           | 12,367           | 12,379           |
| 39   | 6,114                     | 12,374           | 12,327           | 12,408           | 12,333           | 12,403           | 12,343           | 12,413           | 12,365           | 12,357           |
| 40   | 6,091                     | 12,362           | 12,382           | 12,374           | 12,369           | 12,370           | 12,366           | 12,359           | 12,403           | 12,364           |
| 41   | 6,102                     | 12,398           | 12,382           | 12,410           | 12,391           | 12,408           | 12,394           | 12,393           | 12,373           | 12,416           |
| 42   | 6,135                     | 12,407           | 12,409           | 12,440           | 12,450           | 12,402           | 12,416           | 12,426           | 12,445           | 12,430           |
| 43   | 6,150                     | 12,411           | 12,425           | 12,415           | 12,393           | 12,436           | 12,431           | 12,416           | 12,423           | 12,389           |
| 44   | 6,086                     | 12,422           | 12,427           | 12,407           | 12,384           | 12,418           | 12,342           | 12,456           | 12,399           | 12,382           |
| 45   | 6,076                     | 12,419           | 12,403           | 12,330           | 12,393           | 12,376           | 12,398           | 12,383           | 12,408           | 12,375           |
| 46   | 6,103                     | 12,355           | 12,356           | 12,372           | 12,312           | 12,349           | 12,361           | 12,367           | 12,345           | 12,386           |
| 47   | 6,101                     | 12,393           | 12,404           | 12,373           | 12,354           | 12,397           | 12,376           | 12,396           | 12,408           | 12,382           |
| 48   | 6,113                     | 12,381           | 12,399           | 12,349           | 12,399           | 12,351           | 12,396           | 12,422           | 12,362           | 12,401           |
| 49   | 6,147                     | 12,379           | 12,448           | 12,406           | 12,417           | 12,441           | 12,425           | 12,438           | 12,422           | 12,415           |
| 50   | 6,104                     | 12,358           | 12,349           | 12,358           | 12,349           | 12,351           | 12,362           | 12,381           | 12,350           | 12,352           |

| APSN | Percentile <sup>(1)</sup> |                  |                  |                  |                  |                  |                  |                  |                  |                  |
|------|---------------------------|------------------|------------------|------------------|------------------|------------------|------------------|------------------|------------------|------------------|
|      | 2.5 <sup>th</sup>         | 10 <sup>th</sup> | 20 <sup>th</sup> | 30 <sup>th</sup> | 40 <sup>th</sup> | 50 <sup>th</sup> | 60 <sup>th</sup> | 70 <sup>th</sup> | 80 <sup>th</sup> | 90 <sup>th</sup> |
| 51   | 6,107                     | 12,389           | 12,391           | 12,332           | 12,353           | 12,380           | 12,385           | 12,373           | 12,373           | 12,386           |
| 52   | 6,081                     | 12,380           | 12,390           | 12,402           | 12,365           | 12,369           | 12,353           | 12,416           | 12,351           | 12,391           |
| 53   | 6,083                     | 12,341           | 12,349           | 12,321           | 12,333           | 12,399           | 12,343           | 12,335           | 12,329           | 12,333           |
| 54   | 6,127                     | 12,312           | 12,398           | 12,401           | 12,329           | 12,382           | 12,394           | 12,371           | 12,390           | 12,403           |
| 55   | 6,135                     | 12,341           | 12,444           | 12,342           | 12,404           | 12,400           | 12,347           | 12,393           | 12,426           | 12,399           |
| 56   | 6,070                     | 12,293           | 12,370           | 12,322           | 12,298           | 12,340           | 12,330           | 12,312           | 12,365           | 12,331           |
| 57   | 6,098                     | 12,337           | 12,399           | 12,325           | 12,365           | 12,383           | 12,376           | 12,343           | 12,371           | 12,373           |
| 58   | 6,094                     | 12,331           | 12,362           | 12,372           | 12,328           | 12,386           | 12,320           | 12,345           | 12,383           | 12,337           |
| 59   | 6,086                     | 12,365           | 12,337           | 12,310           | 12,355           | 12,329           | 12,404           | 12,293           | 12,388           | 12,333           |
| 60   | 6,098                     | 12,323           | 12,317           | 12,336           | 12,382           | 12,295           | 12,343           | 12,327           | 12,334           | 12,356           |
| 61   | 6,037                     | 12,372           | 12,369           | 12,315           | 12,312           | 12,289           | 12,361           | 12,365           | 12,308           | 12,329           |
| 62   | 6,085                     | 12,303           | 12,272           | 12,355           | 12,260           | 12,281           | 12,323           | 12,300           | 12,316           | 12,328           |
| 63   | 6,089                     | 12,319           | 12,341           | 12,330           | 12,317           | 12,325           | 12,356           | 12,323           | 12,358           | 12,295           |
| 64   | 6,069                     | 12,276           | 12,330           | 12,328           | 12,296           | 12,308           | 12,326           | 12,318           | 12,288           | 12,322           |
| 65   | 6,038                     | 12,405           | 12,342           | 12,379           | 12,332           | 12,322           | 12,357           | 12,379           | 12,378           | 12,333           |
| 66   | 6,093                     | 12,328           | 12,404           | 12,316           | 12,369           | 12,351           | 12,356           | 12,342           | 12,378           | 12,333           |
| 67   | 6,052                     | 12,416           | 12,350           | 12,365           | 12,355           | 12,332           | 12,369           | 12,366           | 12,400           | 12,336           |
| 68   | 6,093                     | 12,340           | 12,312           | 12,299           | 12,318           | 12,395           | 12,306           | 12,306           | 12,360           | 12,313           |
| 69   | 6,081                     | 12,348           | 12,349           | 12,386           | 12,369           | 12,315           | 12,379           | 12,344           | 12,382           | 12,348           |
| 70   | 6,120                     | 12,312           | 12,356           | 12,345           | 12,339           | 12,323           | 12,348           | 12,354           | 12,323           | 12,344           |
| 71   | 6,045                     | 12,310           | 12,314           | 12,321           | 12,340           | 12,285           | 12,316           | 12,340           | 12,296           | 12,331           |
| 72   | 6,066                     | 12,385           | 12,305           | 12,337           | 12,358           | 12,288           | 12,371           | 12,343           | 12,314           | 12,356           |
| 73   | 6,110                     | 12,335           | 12,383           | 12,301           | 12,408           | 12,350           | 12,328           | 12,375           | 12,383           | 12,339           |
| 74   | 6,022                     | 12,334           | 12,342           | 12,323           | 12,271           | 12,301           | 12,346           | 12,265           | 12,362           | 12,295           |
| 75   | 6,035                     | 12,322           | 12,293           | 12,282           | 12,275           | 12,276           | 12,318           | 12,288           | 12,284           | 12,319           |
| 76   | 6,066                     | 12,273           | 12,290           | 12,303           | 12,268           | 12,302           | 12,235           | 12,319           | 12,298           | 12,288           |
| 77   | 6,096                     | 12,244           | 12,356           | 12,288           | 12,301           | 12,302           | 12,304           | 12,338           | 12,325           | 12,294           |

| APSN | Percentile <sup>(1)</sup> |                  |                  |                  |                  |                  |                  |                  |                  |                  |
|------|---------------------------|------------------|------------------|------------------|------------------|------------------|------------------|------------------|------------------|------------------|
|      | 2.5 <sup>th</sup>         | 10 <sup>th</sup> | 20 <sup>th</sup> | 30 <sup>th</sup> | 40 <sup>th</sup> | 50 <sup>th</sup> | 60 <sup>th</sup> | 70 <sup>th</sup> | 80 <sup>th</sup> | 90 <sup>th</sup> |
| 78   | 6,077                     | 12,313           | 12,383           | 12,296           | 12,354           | 12,340           | 12,310           | 12,357           | 12,332           | 12,310           |
| 79   | 6,117                     | 12,340           | 12,394           | 12,337           | 12,385           | 12,387           | 12,388           | 12,354           | 12,352           | 12,364           |
| 80   | 6,101                     | 12,339           | 12,327           | 12,343           | 12,343           | 12,324           | 12,353           | 12,337           | 12,347           | 12,347           |
| 81   | 6,081                     | 12,309           | 12,291           | 12,315           | 12,293           | 12,354           | 12,264           | 12,319           | 12,330           | 12,298           |
| 82   | 6,055                     | 12,316           | 12,346           | 12,300           | 12,298           | 12,319           | 12,344           | 12,292           | 12,307           | 12,336           |
| 83   | 6,069                     | 12,363           | 12,308           | 12,330           | 12,345           | 12,296           | 12,366           | 12,346           | 12,343           | 12,291           |
| 84   | 6,086                     | 12,319           | 12,342           | 12,354           | 12,333           | 12,366           | 12,305           | 12,383           | 12,326           | 12,343           |
| 85   | 6,067                     | 12,294           | 12,349           | 12,312           | 12,305           | 12,332           | 12,309           | 12,322           | 12,327           | 12,298           |
| 86   | 6,069                     | 12,306           | 12,292           | 12,262           | 12,308           | 12,275           | 12,281           | 12,289           | 12,329           | 12,300           |
| 87   | 6,071                     | 12,311           | 12,311           | 12,298           | 12,363           | 12,308           | 12,281           | 12,312           | 12,350           | 12,276           |
| 88   | 6,031                     | 12,321           | 12,333           | 12,274           | 12,328           | 12,260           | 12,291           | 12,353           | 12,320           | 12,283           |
| 89   | 6,091                     | 12,326           | 12,286           | 12,307           | 12,327           | 12,302           | 12,358           | 12,310           | 12,307           | 12,338           |
| 90   | 6,013                     | 12,411           | 12,273           | 12,308           | 12,307           | 12,347           | 12,290           | 12,310           | 12,336           | 12,325           |
| 91   | 6,052                     | 12,312           | 12,278           | 12,279           | 12,300           | 12,256           | 12,312           | 12,287           | 12,295           | 12,295           |
| 92   | 6,081                     | 12,283           | 12,310           | 12,295           | 12,307           | 12,315           | 12,313           | 12,309           | 12,338           | 12,289           |
| 93   | 6,027                     | 12,312           | 12,308           | 12,292           | 12,292           | 12,246           | 12,308           | 12,252           | 12,311           | 12,311           |
| 94   | 6,037                     | 12,300           | 12,253           | 12,244           | 12,244           | 12,304           | 12,236           | 12,281           | 12,258           | 12,303           |
| 95   | 6,051                     | 12,336           | 12,307           | 12,287           | 12,296           | 12,266           | 12,302           | 12,340           | 12,323           | 12,295           |
| 96   | 6,072                     | 12,271           | 12,263           | 12,258           | 12,301           | 12,300           | 12,256           | 12,284           | 12,277           | 12,327           |
| 97   | 6,040                     | 12,338           | 12,369           | 12,270           | 12,351           | 12,334           | 12,328           | 12,305           | 12,359           | 12,316           |
| 98   | 6,044                     | 12,332           | 12,320           | 12,320           | 12,322           | 12,334           | 12,313           | 12,315           | 12,345           | 12,298           |
| 99   | 6,041                     | 12,394           | 12,279           | 12,355           | 12,300           | 12,347           | 12,287           | 12,364           | 12,306           | 12,341           |
| 100  | 6,080                     | 12,219           | 12,325           | 12,258           | 12,261           | 12,312           | 12,266           | 12,280           | 12,291           | 12,274           |
| 101  | 6,047                     | 12,300           | 12,306           | 12,249           | 12,318           | 12,242           | 12,319           | 12,263           | 12,336           | 12,274           |
| 102  | 6,060                     | 12,242           | 12,263           | 12,232           | 12,289           | 12,220           | 12,260           | 12,260           | 12,280           | 12,269           |
| 103  | 6,048                     | 12,277           | 12,270           | 12,286           | 12,240           | 12,309           | 12,236           | 12,324           | 12,263           | 12,249           |
| 104  | 6,042                     | 12,219           | 12,269           | 12,212           | 12,245           | 12,283           | 12,221           | 12,245           | 12,278           | 12,239           |

| APSN | Percentile <sup>(1)</sup> |                  |                  |                  |                  |                  |                  |                  |                  |                  |
|------|---------------------------|------------------|------------------|------------------|------------------|------------------|------------------|------------------|------------------|------------------|
|      | 2.5 <sup>th</sup>         | 10 <sup>th</sup> | 20 <sup>th</sup> | 30 <sup>th</sup> | 40 <sup>th</sup> | 50 <sup>th</sup> | 60 <sup>th</sup> | 70 <sup>th</sup> | 80 <sup>th</sup> | 90 <sup>th</sup> |
| 105  | 6,023                     | 12,307           | 12,244           | 12,256           | 12,260           | 12,290           | 12,252           | 12,248           | 12,265           | 12,267           |
| 106  | 6,024                     | 12,346           | 12,315           | 12,310           | 12,319           | 12,276           | 12,304           | 12,355           | 12,305           | 12,312           |
| 107  | 6,066                     | 12,223           | 12,290           | 12,258           | 12,260           | 12,276           | 12,209           | 12,324           | 12,264           | 12,276           |
| 108  | 6,049                     | 12,323           | 12,305           | 12,294           | 12,304           | 12,278           | 12,281           | 12,296           | 12,346           | 12,292           |
| 109  | 6,055                     | 12,257           | 12,339           | 12,262           | 12,288           | 12,272           | 12,269           | 12,323           | 12,264           | 12,319           |
| 110  | 6,065                     | 12,207           | 12,264           | 12,222           | 12,246           | 12,281           | 12,213           | 12,251           | 12,241           | 12,226           |
| 111  | 6,020                     | 12,286           | 12,273           | 12,258           | 12,247           | 12,271           | 12,252           | 12,241           | 12,248           | 12,308           |
| 112  | 6,042                     | 12,264           | 12,237           | 12,254           | 12,264           | 12,281           | 12,239           | 12,260           | 12,273           | 12,254           |
| 113  | 6,039                     | 12,275           | 12,296           | 12,245           | 12,222           | 12,304           | 12,249           | 12,300           | 12,262           | 12,254           |
| 114  | 6,019                     | 12,296           | 12,228           | 12,263           | 12,245           | 12,263           | 12,227           | 12,274           | 12,272           | 12,252           |
| 115  | 6,041                     | 12,318           | 12,325           | 12,258           | 12,335           | 12,270           | 12,311           | 12,312           | 12,302           | 12,306           |

(1) The percentile groupings for this table are as follows.

| <b>Percentile<br/>Name</b> | <b>Lower<br/>Limit</b> | <b>Percentile<br/>Midpoint</b> | <b>Upper<br/>Limit</b> |
|----------------------------|------------------------|--------------------------------|------------------------|
| 2.5 <sup>th</sup>          | 0 <sup>th</sup>        | 2.5 <sup>th</sup>              | 5 <sup>th</sup>        |
| 10 <sup>th</sup>           | 5 <sup>th</sup>        | 10 <sup>th</sup>               | 15 <sup>th</sup>       |
| 20 <sup>th</sup>           | 15 <sup>th</sup>       | 20 <sup>th</sup>               | 15 <sup>th</sup>       |
| 30 <sup>th</sup>           | 25 <sup>th</sup>       | 30 <sup>th</sup>               | 35 <sup>th</sup>       |
| 40 <sup>th</sup>           | 35 <sup>th</sup>       | 40 <sup>th</sup>               | 45 <sup>th</sup>       |
| 50 <sup>th</sup>           | 45 <sup>th</sup>       | 50 <sup>th</sup>               | 55 <sup>th</sup>       |
| 60 <sup>th</sup>           | 55 <sup>th</sup>       | 60 <sup>th</sup>               | 65 <sup>th</sup>       |
| 70 <sup>th</sup>           | 65 <sup>th</sup>       | 70 <sup>th</sup>               | 75 <sup>th</sup>       |
| 80 <sup>th</sup>           | 75 <sup>th</sup>       | 80 <sup>th</sup>               | 85 <sup>th</sup>       |
| 90 <sup>th</sup>           | 85 <sup>th</sup>       | 90 <sup>th</sup>               | 95 <sup>th</sup>       |
