# Supplementary material for: A Comparison of 100 Human Genes Using an Alu Element-Based Instability Model
Source: PubMed Central journal article supplement (PMC3670932; doi:10.1371/journal.pone.0065188), 2013-06-03
Supplement: pone.0065188.s006.pdf [file pone.0065188.s006.pdf]

**Table S6**

**Coefficients for equations describing the I:D ratio versus spacer size for Type 1 *Alu* pairs**

| APSN | Spacer Size Range, bp |                  |                | Equation Type          | Equation Coefficients |               |         |         |
|------|-----------------------|------------------|----------------|------------------------|-----------------------|---------------|---------|---------|
|      | Range ID              | Range Start (bp) | Range End (bp) |                        | C1                    | C2            | C3      | C4      |
| 1    | A                     | 51               | 99             | Constant               | 0.79941               |               |         |         |
|      | B                     | 100              | 264            | Line (C1= m and C2= b) | 0.9194                | 0.0007272379  |         |         |
|      | C                     | 265              | 469            | Line (C1= m and C2= b) | 0.91287               | -0.0000318732 |         |         |
|      | D                     | 470              | 690            | Line (C1= m and C2= b) | 0.91759               | 0.0000213801  |         |         |
|      | E                     | 691              | 7,538          | Log10-Log10 Cubic      | 7.78075               | -6.7456467666 | 1.91217 | -0.1783 |
|      | F                     | 7,539            | 21,717         | Line (C1= m and C2= b) | 0.95928               | 0.0000028717  |         |         |
| 2    | A                     | 51               | 343            | Constant               | 0.93436               |               |         |         |
|      | B                     | 344              | 549            | Line (C1= m and C2= b) | 0.9772                | 0.0002079614  |         |         |
|      | C                     | 550              | 10,299         | Log10-Log10 Cubic      | 2.32578               | -1.7777937965 | 0.42427 | -0.0316 |
|      | D                     | 10,300           | 29,292         | Line (C1= m and C2= b) | 0.96048               | 0.0000020805  |         |         |
| 3    | A                     | 51               | 631            | Constant               | 0.97516               |               |         |         |
|      | B                     | 632              | 14,072         | Log10-Log10 Cubic      | 0.64634               | -0.3094873157 | 0.00741 | 0.00689 |
|      | C                     | 14,071           | 37,466         | Line (C1= m and C2= b) | 0.95926               | 0.0000017414  |         |         |
| 4    | A                     | 51               | 971            | Constant               | 0.97879               |               |         |         |
|      | B                     | 972              | 18,160         | Log10-Log10 Cubic      | 3.30368               | -2.4948824775 | 0.60811 | -0.0483 |
|      | C                     | 18,161           | 46,577         | Line (C1= m and C2= b) | 0.95435               | 0.0000016063  |         |         |
| 5    | A                     | 51               | 1,323          | Constant               | 0.97511               |               |         |         |
|      | C                     | 1,324            | 22,676         | Log10-Log10 Cubic      | 5.31725               | -4.0530801705 | 1.01082 | -0.083  |
|      | D                     | 22,677           | 55,728         | Line (C1= m and C2= b) | 0.95187               | 0.0000014562  |         |         |
| 6    | A                     | 51               | 1,693          | Constant               | 0.96868               |               |         |         |
|      | B                     | 1,694            | 26,666         | Log10-Log10 Cubic      | 6.78571               | -5.1303849864 | 1.27409 | -0.1045 |
|      | C                     | 26,667           | 63,564         | Line (C1= m and C2= b) | 0.95072               | 0.0000013357  |         |         |
| 7    | A                     | 51               | 2,090          | Constant               | 0.96075               |               |         |         |
|      | B                     | 2,091            | 8,100          | Log10-Log10 Cubic      | 7.67666               | -5.7385946167 | 1.41142 | -0.1147 |
|      | C                     | 8,101            | 31,551         | Log10-Log10 Quadratic  | 0.95541               | -0.5177208724 | 0.06707 |         |
|      | D                     | 31,552           | 72,428         | Line (C1= m and C2= b) | 0.96339               | 0.0000008957  |         |         |
| 8    | A                     | 51               | 2,499          | Constant               | 0.95258               |               |         |         |
|      | B                     | 2,500            | 9,500          | Log10-Log10 Cubic      | 8.03752               | -5.9433109647 | 1.44697 | -0.1165 |

|           |   |        |         |                        |         |               |         |         |
|-----------|---|--------|---------|------------------------|---------|---------------|---------|---------|
|           | C | 9,501  | 36,034  | Log10-Log10 Quadratic  | 0.84396 | -0.4550433066 | 0.05843 |         |
|           | D | 36,035 | 80,576  | Line (C1= m and C2= b) | 0.96309 | 0.0000008286  |         |         |
| <b>9</b>  | A | 51     | 2,911   | Constant               | 0.94465 |               |         |         |
|           | B | 2,912  | 10,750  | Log10-Log10 Cubic      | 7.87334 | -5.7646659812 | 1.38977 | -0.1108 |
|           | C | 10,751 | 40,625  | Log10-Log10 Quadratic  | 0.71591 | -0.3868429278 | 0.04945 |         |
|           | D | 40,626 | 89,224  | Line (C1= m and C2= b) | 0.9627  | 0.0000007675  |         |         |
| <b>10</b> | A | 51     | 3,336   | Constant               | 0.93683 |               |         |         |
|           | B | 3,337  | 12,100  | Log10-Log10 Cubic      | 7.3152  | -5.3114112439 | 1.26928 | -0.1003 |
|           | C | 12,101 | 45,150  | Log10-Log10 Quadratic  | 0.5754  | -0.3149352684 | 0.04033 |         |
|           | D | 45,151 | 97,408  | Line (C1= m and C2= b) | 0.96219 | 0.0000007235  |         |         |
| <b>11</b> | A | 51     | 3,765   | Constant               | 0.92948 |               |         |         |
|           | B | 3,766  | 13,400  | Log10-Log10 Cubic      | 6.33025 | -4.5652093163 | 1.08231 | -0.0848 |
|           | C | 13,401 | 49,917  | Log10-Log10 Quadratic  | 0.4264  | -0.2407097699 | 0.03115 |         |
|           | D | 49,918 | 106,671 | Line (C1= m and C2= b) | 0.96162 | 0.0000006763  |         |         |
| <b>12</b> | A | 51     | 4,218   | Constant               | 0.92198 |               |         |         |
|           | B | 4,219  | 14,800  | Log10-Log10 Cubic      | 4.98994 | -3.5857176421 | 0.84491 | -0.0657 |
|           | C | 14,801 | 54,434  | Log10-Log10 Quadratic  | 0.26715 | -0.1634456012 | 0.02183 |         |
|           | D | 54,435 | 114,298 | Line (C1= m and C2= b) | 0.96084 | 0.0000006541  |         |         |
| <b>13</b> | A | 51     | 4,671   | Constant               | 0.92562 |               |         |         |
|           | B | 4,672  | 12,900  | Log10-Log10 Cubic      | 5.62479 | -4.0015748693 | 0.93521 | -0.0722 |
|           | C | 12,901 | 58,961  | Log10-Log10 Quadratic  | 0.2831  | -0.1684096940 | 0.02212 |         |
|           | D | 58,962 | 122,454 | Line (C1= m and C2= b) | 0.96183 | 0.0000006011  |         |         |
| <b>14</b> | A | 51     | 5,133   | Constant               | 0.92835 |               |         |         |
|           | B | 5,134  | 13,800  | Log10-Log10 Cubic      | 5.95354 | -4.1982490417 | 0.97354 | -0.0746 |
|           | C | 13,801 | 63,302  | Log10-Log10 Quadratic  | 0.28973 | -0.1691164402 | 0.02194 |         |
|           | D | 63,303 | 130,613 | Line (C1= m and C2= b) | 0.96256 | 0.0000005562  |         |         |
| <b>15</b> | A | 51     | 5,573   | Constant               | 0.93092 |               |         |         |
|           | B | 5,574  | 15,000  | Log10-Log10 Cubic      | 6.01221 | -4.2039766602 | 0.96714 | -0.0736 |
|           | C | 15,001 | 68,492  | Log10-Log10 Quadratic  | 0.2881  | -0.1658382799 | 0.02128 |         |
|           | D | 68,493 | 139,999 | Line (C1= m and C2= b) | 0.96336 | 0.0000005562  |         |         |
| <b>16</b> | A | 51     | 6,040   | Constant               | 0.93299 |               |         |         |
|           | B | 6,041  | 20,000  | Log10-Log10 Cubic      | 6.03715 | -4.1900057268 | 0.95715 | -0.0723 |
|           | C | 20,001 | 73,690  | Log10-Log10 Quadratic  | 0.2771  | -0.1584836840 | 0.02019 |         |
|           | D | 73,691 | 148,620 | Line (C1= m and C2= b) | 0.96404 | 0.0000004799  |         |         |
| <b>17</b> | A | 51     | 6,505   | Constant               | 0.93515 |               |         |         |
|           | B | 6,506  | 21,000  | Log10-Log10 Cubic      | 6.3595  | -4.3846910584 | 0.9958  | -0.0748 |
|           | C | 21,001 | 77,558  | Log10-Log10 Quadratic  | 0.28357 | -0.1597125440 | 0.02015 |         |
|           | D | 77,559 | 155,268 | Line (C1= m and C2= b) | 0.96466 | 0.0000004548  |         |         |

|    |   |         |         |                        |         |               |         |         |
|----|---|---------|---------|------------------------|---------|---------------|---------|---------|
| 18 | A | 51      | 6,979   | Constant               | 0.93723 |               |         |         |
|    | B | 6,980   | 22,700  | Log10-Log10 Cubic      | 6.60112 | -4.5212397393 | 1.02062 | -0.0762 |
|    | C | 22,701  | 82,510  | Log10-Log10 Quadratic  | 0.28491 | -0.1585531188 | 0.01983 |         |
|    | D | 82,511  | 163,997 | Line (C1= m and C2= b) | 0.96547 | 0.0000004238  |         |         |
| 19 | A | 51      | 7,462   | Constant               | 0.93911 |               |         |         |
|    | B | 7,463   | 23,900  | Log10-Log10 Cubic      | 6.86596 | -4.6745775179 | 1.04952 | -0.078  |
|    | C | 23,901  | 86,868  | Log10-Log10 Quadratic  | 0.28819 | -0.1584532865 | 0.01965 |         |
|    | D | 86,869  | 170,083 | Line (C1= m and C2= b) | 0.96613 | 0.0000004070  |         |         |
| 20 | A | 51      | 7,959   | Constant               | 0.94104 |               |         |         |
|    | B | 7,960   | 25,500  | Log10-Log10 Cubic      | 7.08419 | -4.7943952397 | 1.07051 | -0.0791 |
|    | C | 25,501  | 91,524  | Log10-Log10 Quadratic  | 0.292   | -0.1585728258 | 0.0195  |         |
|    | D | 91,525  | 177,631 | Line (C1= m and C2= b) | 0.96686 | 0.0000003849  |         |         |
| 21 | A | 51      | 8,411   | Constant               | 0.94274 |               |         |         |
|    | B | 8,412   | 26,750  | Log10-Log10 Cubic      | 7.22215 | -4.8615843620 | 1.08005 | -0.0795 |
|    | C | 26,751  | 96,502  | Log10-Log10 Quadratic  | 0.29317 | -0.1576419079 | 0.01925 |         |
|    | D | 96,503  | 186,522 | Line (C1= m and C2= b) | 0.9676  | 0.0000003599  |         |         |
| 22 | A | 51      | 8,889   | Constant               | 0.9445  |               |         |         |
|    | B | 8,890   | 28,100  | Log10-Log10 Cubic      | 7.4093  | -4.9616460858 | 1.09696 | -0.0803 |
|    | C | 28,101  | 101,169 | Log10-Log10 Quadratic  | 0.29772 | -0.1582725229 | 0.01918 |         |
|    | D | 101,170 | 194,649 | Line (C1= m and C2= b) | 0.96831 | 0.0000003390  |         |         |
| 23 | A | 51      | 9,389   | Constant               | 0.94623 |               |         |         |
|    | B | 9,390   | 29,500  | Log10-Log10 Cubic      | 7.57276 | -5.0453328033 | 1.11018 | -0.0809 |
|    | C | 29,501  | 105,759 | Log10-Log10 Quadratic  | 0.30285 | -0.1591522224 | 0.01914 |         |
|    | D | 105,760 | 201,592 | Line (C1= m and C2= b) | 0.96895 | 0.0000003240  |         |         |
| 24 | A | 51      | 9,852   | Constant               | 9853    |               |         |         |
|    | B | 9,853   | 31,000  | Log10-Log10 Cubic      | 7.68002 | -5.0928725095 | 1.1157  | -0.081  |
|    | C | 31,001  | 110,468 | Log10-Log10 Quadratic  | 0.307   | -0.1596808311 | 0.01907 |         |
|    | D | 110,469 | 207,881 | Line (C1= m and C2= b) | 0.96962 | 0.0000003118  |         |         |
| 25 | A | 51      | 10,342  | Constant               | 0.94941 |               |         |         |
|    | B | 10,343  | 32,300  | Log10-Log10 Cubic      | 7.80893 | -5.1544774357 | 1.12428 | -0.0813 |
|    | C | 32,301  | 115,375 | Log10-Log10 Quadratic  | 0.31133 | -0.1603210874 | 0.01901 |         |
|    | D | 115,376 | 217,907 | Line (C1= m and C2= b) | 0.97031 | 0.0000002896  |         |         |
| 26 | A | 51      | 10,835  | Constant               | 0.95089 |               |         |         |
|    | B | 10,836  | 33,500  | Log10-Log10 Cubic      | 8.00558 | -5.2620537953 | 1.14327 | -0.0823 |
|    | C | 33,501  | 119,496 | Log10-Log10 Quadratic  | 0.31836 | -0.1622678128 | 0.01911 |         |
|    | D | 119,497 | 225,030 | Line (C1= m and C2= b) | 0.97087 | 0.0000002760  |         |         |
| 27 | A | 51      | 11,318  | Constant               | 0.95243 |               |         |         |
|    | B | 11,319  | 35,000  | Log10-Log10 Cubic      | 8.06202 | -5.2767565134 | 1.14185 | -0.0819 |

|           |   |         |         |                        |         |               |         |         |
|-----------|---|---------|---------|------------------------|---------|---------------|---------|---------|
|           | C | 35,001  | 124,295 | Log10-Log10 Quadratic  | 0.32327 | -0.1631763677 | 0.01909 |         |
|           | D | 124,296 | 233,993 | Line (C1= m and C2= b) | 0.97154 | 0.0000002595  |         |         |
| <b>28</b> | A | 51      | 11,852  | Constant               | 0.95393 |               |         |         |
|           | B | 11,853  | 36,300  | Log10-Log10 Cubic      | 8.22296 | -5.3592619123 | 1.15509 | -0.0825 |
|           | C | 36,301  | 128,840 | Log10-Log10 Quadratic  | 0.33068 | -0.1652284960 | 0.0192  |         |
|           | D | 128,841 | 241,529 | Line (C1= m and C2= b) | 0.97212 | 0.0000002474  |         |         |
| <b>29</b> | A | 51      | 12,319  | Constant               | 0.95524 |               |         |         |
|           | B | 12,320  | 37,700  | Log10-Log10 Cubic      | 8.24358 | -5.3522305553 | 1.14935 | -0.0818 |
|           | C | 37,701  | 133,782 | Log10-Log10 Quadratic  | 0.33379 | -0.1654797210 | 0.01912 |         |
|           | D | 133,783 | 249,163 | Line (C1= m and C2= b) | 0.97275 | 0.0000002362  |         |         |
| <b>30</b> | A | 51      | 12,811  | Constant               | 0.95663 |               |         |         |
|           | B | 12,812  | 39,000  | Log10-Log10 Cubic      | 8.35346 | -5.4032014313 | 1.15617 | -0.082  |
|           | C | 39,001  | 138,266 | Log10-Log10 Quadratic  | 0.3413  | -0.1676708908 | 0.01926 |         |
|           | D | 138,267 | 239,318 | Line (C1= m and C2= b) | 0.97333 | 0.0000002639  |         |         |
| <b>31</b> | A | 51      | 13,375  | Constant               | 0.958   |               |         |         |
|           | B | 13,376  | 40,500  | Log10-Log10 Cubic      | 8.52009 | -5.4904964718 | 1.17077 | -0.0828 |
|           | C | 40,501  | 142,612 | Log10-Log10 Quadratic  | 0.34866 | -0.1697504644 | 0.01938 |         |
|           | D | 142,613 | 265,420 | Line (C1= m and C2= b) | 0.97388 | 0.0000002127  |         |         |
| <b>32</b> | A | 51      | 13,838  | Constant               | 0.95917 |               |         |         |
|           | B | 13,839  | 41,500  | Log10-Log10 Cubic      | 8.48164 | -5.4468271723 | 1.15756 | -0.0816 |
|           | C | 41,501  | 147,465 | Log10-Log10 Quadratic  | 0.35274 | -0.1704882715 | 0.01936 |         |
|           | D | 147,466 | 271,220 | Line (C1= m and C2= b) | 0.97444 | 0.0000002066  |         |         |
| <b>33</b> | A | 51      | 14,385  | Constant               | 0.9605  |               |         |         |
|           | B | 14,386  | 43,200  | Log10-Log10 Cubic      | 8.60465 | -5.5059347391 | 1.16614 | -0.0819 |
|           | C | 43,201  | 152,367 | Log10-Log10 Quadratic  | 0.35969 | -0.1724239548 | 0.01947 |         |
|           | D | 152,368 | 279,208 | Line (C1= m and C2= b) | 0.97503 | 0.0000001969  |         |         |
| <b>34</b> | A | 51      | 14,914  | Constant               | 0.96179 |               |         |         |
|           | B | 14,915  | 44,600  | Log10-Log10 Cubic      | 8.64496 | -5.5117456963 | 1.16331 | -0.0815 |
|           | C | 44,601  | 157,912 | Log10-Log10 Quadratic  | 0.36526 | -0.1737900390 | 0.01952 |         |
|           | D | 157,913 | 287,054 | Line (C1= m and C2= b) | 0.97572 | 0.0000001880  |         |         |
| <b>35</b> | A | 51      | 15,380  | Constant               | 0.96293 |               |         |         |
|           | B | 15,381  | 45,800  | Log10-Log10 Cubic      | 8.75243 | -5.5650925696 | 1.17158 | -0.0818 |
|           | C | 45,801  | 160,843 | Log10-Log10 Quadratic  | 0.37522 | -0.1771714507 | 0.0198  |         |
|           | D | 160,844 | 294,503 | Line (C1= m and C2= b) | 0.97604 | 0.0000001792  |         |         |
| <b>36</b> | A | 51      | 15,961  | Constant               | 0.96414 |               |         |         |
|           | B | 15,962  | 47,300  | Log10-Log10 Cubic      | 8.80507 | -5.5789392078 | 1.17055 | -0.0815 |
|           | C | 47,301  | 166,334 | Log10-Log10 Quadratic  | 0.38036 | -0.1783330903 | 0.01983 |         |
|           | D | 166,335 | 303,528 | Line (C1= m and C2= b) | 0.97666 | 0.0000001701  |         |         |

|    |   |         |         |                        |         |               |         |         |
|----|---|---------|---------|------------------------|---------|---------------|---------|---------|
| 37 | A | 51      | 16,384  | Constant               | 0.96533 |               |         |         |
|    | B | 16,385  | 49,000  | Log10-Log10 Cubic      | 8.72895 | -5.5142209618 | 1.1536  | -0.0801 |
|    | C | 49,001  | 171,223 | Log10-Log10 Quadratic  | 0.38752 | -0.1804542509 | 0.01997 |         |
|    | D | 171,224 | 310,150 | Line (C1= m and C2= b) | 0.97723 | 0.0000001639  |         |         |
| 38 | A | 51      | 16,899  | Constant               | 0.96641 |               |         |         |
|    | B | 16,900  | 50,000  | Log10-Log10 Cubic      | 8.74565 | -5.5081973951 | 1.149   | -0.0795 |
|    | C | 50,001  | 176,317 | Log10-Log10 Quadratic  | 0.39136 | -0.1811777640 | 0.01996 |         |
|    | D | 176,318 | 318,342 | Line (C1= m and C2= b) | 0.9778  | 0.0000001563  |         |         |
| 39 | A | 51      | 17,438  | Constant               | 0.96756 |               |         |         |
|    | B | 17,439  | 51,500  | Log10-Log10 Cubic      | 8.80864 | -5.5309815528 | 1.1504  | -0.0794 |
|    | C | 51,501  | 181,108 | Log10-Log10 Quadratic  | 0.40054 | -0.1841547520 | 0.02019 |         |
|    | D | 181,109 | 327,005 | Line (C1= m and C2= b) | 0.97832 | 0.0000001486  |         |         |
| 40 | A | 51      | 17,946  | Constant               | 0.96871 |               |         |         |
|    | B | 17,947  | 52,750  | Log10-Log10 Cubic      | 8.74909 | -5.4776029778 | 1.13609 | -0.0782 |
|    | C | 52,751  | 185,418 | Log10-Log10 Quadratic  | 0.40868 | -0.1866418148 | 0.02037 |         |
|    | D | 185,419 | 301,516 | Line (C1= m and C2= b) | 0.97877 | 0.0000001828  |         |         |
| 41 | A | 51      | 18,399  | Constant               | 0.96973 |               |         |         |
|    | B | 18,400  | 54,000  | Log10-Log10 Cubic      | 8.79886 | -5.4949973504 | 1.13697 | -0.0781 |
|    | C | 54,001  | 189,553 | Log10-Log10 Quadratic  | 0.41743 | -0.1895402963 | 0.0206  |         |
|    | D | 189,554 | 339,349 | Line (C1= m and C2= b) | 0.97922 | 0.0000001387  |         |         |
| 42 | A | 51      | 18,988  | Constant               | 0.97085 |               |         |         |
|    | B | 18,989  | 55,500  | Log10-Log10 Cubic      | 8.82416 | -5.4939691984 | 1.13342 | -0.0776 |
|    | C | 55,501  | 195,023 | Log10-Log10 Quadratic  | 0.42413 | -0.1914173967 | 0.02071 |         |
|    | D | 195,024 | 348,417 | Line (C1= m and C2= b) | 0.97978 | 0.0000001318  |         |         |
| 43 | A | 51      | 19,504  | Constant               | 0.97179 |               |         |         |
|    | B | 19,505  | 57,000  | Log10-Log10 Cubic      | 8.73067 | -5.4205615811 | 1.11521 | -0.0762 |
|    | C | 57,001  | 200,344 | Log10-Log10 Quadratic  | 0.42797 | -0.1921694132 | 0.02071 |         |
|    | D | 200,345 | 356,317 | Line (C1= m and C2= b) | 0.98031 | 0.0000001263  |         |         |
| 44 | A | 51      | 20,051  | Constant               | 0.97288 |               |         |         |
|    | B | 20,052  | 58,300  | Log10-Log10 Cubic      | 8.79712 | -5.4469249713 | 1.11771 | -0.0761 |
|    | C | 58,301  | 205,283 | Log10-Log10 Quadratic  | 0.43743 | -0.1952772019 | 0.02096 |         |
|    | D | 205,284 | 362,245 | Line (C1= m and C2= b) | 0.98082 | 0.0000001222  |         |         |
| 45 | A | 51      | 20,583  | Constant               | 0.97391 |               |         |         |
|    | B | 20,584  | 59,700  | Log10-Log10 Cubic      | 8.76577 | -5.4128755524 | 1.10782 | -0.0753 |
|    | C | 59,701  | 209,826 | Log10-Log10 Quadratic  | 0.44597 | -0.1979802132 | 0.02116 |         |
|    | D | 209,827 | 370,629 | Line (C1= m and C2= b) | 0.98123 | 0.0000001167  |         |         |
| 46 | A | 51      | 21,074  | Constant               | 0.9749  |               |         |         |
|    | B | 21,075  | 61,300  | Log10-Log10 Cubic      | 8.71724 | -5.3710822314 | 1.09697 | -0.0744 |

|    |   |         |         |                        |         |               |         |         |
|----|---|---------|---------|------------------------|---------|---------------|---------|---------|
|    | C | 61,301  | 213,098 | Log10-Log10 Quadratic  | 0.4517  | -0.1995403580 | 0.02125 |         |
|    | D | 213,099 | 378,013 | Line (C1= m and C2= b) | 0.98157 | 0.0000001118  |         |         |
| 47 | A | 51      | 21,635  | Constant               | 0.97582 |               |         |         |
|    | B | 21,636  | 62,600  | Log10-Log10 Cubic      | 8.71833 | -5.3574844497 | 1.09137 | -0.0738 |
|    | C | 62,601  | 218,419 | Log10-Log10 Quadratic  | 0.4586  | -0.2016072791 | 0.0214  |         |
|    | D | 218,420 | 384,952 | Line (C1= m and C2= b) | 0.98206 | 0.0000001077  |         |         |
| 48 | A | 51      | 22,155  | Constant               | 0.97689 |               |         |         |
|    | B | 22,156  | 64,000  | Log10-Log10 Cubic      | 8.68622 | -5.3238643715 | 1.08179 | -0.073  |
|    | C | 64,001  | 223,001 | Log10-Log10 Quadratic  | 0.4686  | -0.2049163494 | 0.02166 |         |
|    | D | 223,002 | 392,076 | Line (C1= m and C2= b) | 0.98249 | 0.0000001035  |         |         |
| 49 | A | 51      | 22,655  | Constant               | 0.97772 |               |         |         |
|    | B | 22,656  | 65,300  | Log10-Log10 Cubic      | 8.61097 | -5.2653979547 | 1.06746 | -0.0719 |
|    | C | 65,301  | 227,791 | Log10-Log10 Quadratic  | 0.47297 | -0.2059762289 | 0.02171 |         |
|    | D | 227,792 | 399,869 | Line (C1= m and C2= b) | 0.98292 | 0.0000000993  |         |         |
| 50 | A | 51      | 23,144  | Constant               | 0.97874 |               |         |         |
|    | B | 23,145  | 66,700  | Log10-Log10 Cubic      | 8.51836 | -5.1965486331 | 1.05112 | -0.0706 |
|    | C | 66,701  | 231,295 | Log10-Log10 Quadratic  | 0.48343 | -0.2094683826 | 0.02199 |         |
|    | D | 231,296 | 407,231 | Line (C1= m and C2= b) | 0.98324 | 0.0000000952  |         |         |
| 51 | A | 51      | 23,714  | Constant               | 0.97959 |               |         |         |
|    | B | 23,715  | 68,100  | Log10-Log10 Cubic      | 8.58137 | -5.2228939903 | 1.05409 | -0.0706 |
|    | C | 68,101  | 236,850 | Log10-Log10 Quadratic  | 0.48924 | -0.2111573475 | 0.02211 |         |
|    | D | 236,851 | 415,131 | Line (C1= m and C2= b) | 0.9838  | 0.0000000909  |         |         |
| 52 | A | 51      | 24,243  | Constant               | 0.98053 |               |         |         |
|    | B | 24,244  | 69,600  | Log10-Log10 Cubic      | 8.56614 | -5.2022787638 | 1.04775 | -0.0701 |
|    | C | 69,601  | 240,314 | Log10-Log10 Quadratic  | 0.49771 | -0.2138742516 | 0.02232 |         |
|    | D | 240,315 | 422,838 | Line (C1= m and C2= b) | 0.9841  | 0.0000000871  |         |         |
| 53 | A | 51      | 24,700  | Constant               | 0.98118 |               |         |         |
|    | B | 24,701  | 71,100  | Log10-Log10 Cubic      | 8.41163 | -5.0969237864 | 1.02421 | -0.0684 |
|    | C | 71,101  | 246,671 | Log10-Log10 Quadratic  | 0.4961  | -0.2125883238 | 0.02213 |         |
|    | D | 246,672 | 428,614 | Line (C1= m and C2= b) | 0.98467 | 0.0000000843  |         |         |
| 54 | A | 51      | 25,256  | Constant               | 0.98196 |               |         |         |
|    | B | 25,257  | 72,500  | Log10-Log10 Cubic      | 8.43964 | -5.1044200744 | 1.02392 | -0.0682 |
|    | C | 72,501  | 249,886 | Log10-Log10 Quadratic  | 0.50133 | -0.2140452025 | 0.02222 |         |
|    | D | 249,887 | 437,018 | Line (C1= m and C2= b) | 0.98494 | 0.0000000805  |         |         |
| 55 | A | 51      | 25,768  | Constant               | 0.98259 |               |         |         |
|    | B | 25,769  | 73,700  | Log10-Log10 Cubic      | 8.38483 | -5.0609738063 | 1.01319 | -0.0674 |
|    | C | 73,701  | 254,587 |                        | 0.50468 | -0.2148067115 | 0.02225 |         |
|    | D | 254,588 | 442,936 | Line (C1= m and C2= b) | 0.98534 | 0.0000000779  |         |         |

|    |   |         |         |                        |         |               |         |         |
|----|---|---------|---------|------------------------|---------|---------------|---------|---------|
| 56 | A | 51      | 26,280  | Constant               | 0.98332 |               |         |         |
|    | B | 26,281  | 74,800  | Log10-Log10 Cubic      | 8.30592 | -5.0018314423 | 0.99908 | -0.0663 |
|    | C | 74,801  | 260,229 | Log10-Log10 Quadratic  | 0.51098 | -0.2167404331 | 0.02239 |         |
|    | D | 260,230 | 451,854 | Line (C1= m and C2= b) | 0.98582 | 0.0000000740  |         |         |
| 57 | A | 51      | 26,734  | Constant               | 0.98397 |               |         |         |
|    | B | 26,735  | 76,500  | Log10-Log10 Cubic      | 8.16592 | -4.9088811922 | 0.97883 | -0.0648 |
|    | C | 76,501  | 263,552 | Log10-Log10 Quadratic  | 0.51027 | -0.2158201160 | 0.02224 |         |
|    | D | 263,553 | 458,089 | Line (C1= m and C2= b) | 0.98606 | 0.0000000717  |         |         |
| 58 | A | 51      | 27,371  | Constant               | 0.9847  |               |         |         |
|    | B | 27,372  | 77,900  | Log10-Log10 Cubic      | 8.26716 | -4.9609748182 | 0.98759 | -0.0653 |
|    | C | 77,901  | 267,196 | Log10-Log10 Quadratic  | 0.51649 | -0.2177068384 | 0.02238 |         |
|    | D | 267,197 | 466,019 | Line (C1= m and C2= b) | 0.98638 | 0.0000000685  |         |         |
| 59 | A | 51      | 27,910  | Constant               | 0.98531 |               |         |         |
|    | B | 27,911  | 79,400  | Log10-Log10 Cubic      | 8.14568 | -4.8776797063 | 0.96897 | -0.0639 |
|    | C | 79,401  | 272,890 | Log10-Log10 Quadratic  | 0.51628 | -0.2170096407 | 0.02225 |         |
|    | D | 272,891 | 475,040 | Line (C1= m and C2= b) | 0.98684 | 0.0000000651  |         |         |
| 60 | A | 51      | 28,404  | Constant               | 0.98596 |               |         |         |
|    | B | 28,405  | 80,500  | Log10-Log10 Cubic      | 8.07343 | -4.8250858639 | 0.9567  | -0.063  |
|    | C | 80,501  | 277,612 | Log10-Log10 Quadratic  | 0.52625 | -0.2197938338 | 0.02243 |         |
|    | D | 277,613 | 481,867 | Line (C1= m and C2= b) | 0.98725 | 0.0000000624  |         |         |
| 61 | A | 51      | 29,038  | Constant               | 0.98672 |               |         |         |
|    | B | 29,039  | 82,000  | Log10-Log10 Cubic      | 8.02976 | -4.7881649218 | 0.9473  | -0.0623 |
|    | C | 82,001  | 283,196 | Log10-Log10 Quadratic  | 0.52807 | -0.2200778579 | 0.02242 |         |
|    | D | 283,197 | 489,064 | Line (C1= m and C2= b) | 0.98768 | 0.0000000599  |         |         |
| 62 | A | 51      | 29,466  | Constant               | 0.98724 |               |         |         |
|    | B | 29,467  | 83,200  | Log10-Log10 Cubic      | 7.96352 | -4.7408392322 | 0.9364  | -0.0614 |
|    | C | 83,201  | 288,350 | Log10-Log10 Quadratic  | 0.52694 | -0.2189759548 | 0.02225 |         |
|    | D | 288,351 | 497,233 | Line (C1= m and C2= b) | 0.98814 | 0.0000000568  |         |         |
| 63 | A | 51      | 30,085  | Constant               | 0.98789 |               |         |         |
|    | B | 30,086  | 85,100  | Log10-Log10 Cubic      | 7.85936 | -4.6683287516 | 0.92004 | -0.0602 |
|    | C | 85,101  | 294,569 | Log10-Log10 Quadratic  | 0.53231 | -0.2205501273 | 0.02236 |         |
|    | D | 294,570 | 504,300 | Line (C1= m and C2= b) | 0.98858 | 0.0000000545  |         |         |
| 64 | A | 51      | 30,657  | Constant               | 0.98855 |               |         |         |
|    | B | 30,658  | 86,500  | Log10-Log10 Cubic      | 7.83885 | -4.6478952633 | 0.91445 | -0.0598 |
|    | C | 86,501  | 298,371 | Log10-Log10 Quadratic  | 0.52993 | -0.2191099262 | 0.02218 |         |
|    | D | 298,372 | 510,396 | Line (C1= m and C2= b) | 0.98886 | 0.0000000526  |         |         |
| 65 | A | 51      | 31,106  | Constant               | 0.98900 |               |         |         |
|    | B | 31,107  | 87,900  | Log10-Log10 Cubic      | 7.70823 | -4.5635749962 | 0.89653 | -0.0585 |

|    |   |         |         |                        |         |               |         |         |
|----|---|---------|---------|------------------------|---------|---------------|---------|---------|
|    | C | 87,901  | 302,140 | Log10-Log10 Quadratic  | 0.53295 | -0.2197758341 | 0.0222  |         |
|    | D | 302,141 | 519,956 | Line (C1= m and C2= b) | 0.98912 | 0.0000000499  |         |         |
| 66 | A | 51      | 31,658  | Constant               | 0.98965 |               |         |         |
|    | B | 31,659  | 89,600  | Log10-Log10 Cubic      | 7.81415 | -4.6228578772 | 0.90766 | -0.0592 |
|    | C | 89,601  | 302,140 | Log10-Log10 Quadratic  | 0.53306 | -0.2192671932 | 0.0221  |         |
|    | D | 302,141 | 524,828 | Line (C1= m and C2= b) | 0.98918 | 0.0000000486  |         |         |
| 67 | A | 51      | 32,182  | Constant               | 0.99021 |               |         |         |
|    | B | 32,183  | 90,900  | Log10-Log10 Cubic      | 7.5079  | -4.4276041070 | 0.86647 | -0.0563 |
|    | C | 90,901  | 312,866 | Log10-Log10 Quadratic  | 0.5126  | -0.2023614945 | 0.01973 |         |
|    | D | 312,867 | 536,209 | Line (C1= m and C2= b) | 0.98991 | 0.0000000452  |         |         |
| 68 | A | 51      | 32,698  | Constant               | 0.9906  |               |         |         |
|    | B | 32,699  | 92,400  | Log10-Log10 Cubic      | 7.47995 | -4.4061127434 | 0.86133 | -0.0559 |
|    | C | 92,401  | 316,456 | Log10-Log10 Quadratic  | 0.52987 | -0.2175731016 | 0.0219  |         |
|    | D | 316,457 | 539,552 | Line (C1= m and C2= b) | 0.99021 | 0.0000000439  |         |         |
| 69 | A | 51      | 33,239  | Constant               | 0.99096 |               |         |         |
|    | B | 33,240  | 93,600  | Log10-Log10 Cubic      | 7.42255 | -4.3659427914 | 0.85227 | -0.0553 |
|    | C | 93,601  | 320,322 | Log10-Log10 Quadratic  | 0.52894 | -0.2167723751 | 0.02179 |         |
|    | D | 320,323 | 548,261 | Line (C1= m and C2= b) | 0.99044 | 0.0000000419  |         |         |
| 70 | A | 51      | 33,652  | Constant               | 0.99138 |               |         |         |
|    | B | 33,653  | 94,900  | Log10-Log10 Cubic      | 7.26012 | -4.2641052988 | 0.83118 | -0.0538 |
|    | C | 94,901  | 323,337 | Log10-Log10 Quadratic  | 0.52708 | -0.2155854502 | 0.02163 |         |
|    | D | 323,338 | 554,659 | Line (C1= m and C2= b) | 0.99061 | 0.0000000406  |         |         |
| 71 | A | 51      | 34,267  | Constant               | 0.99186 |               |         |         |
|    | B | 34,268  | 96,800  | Log10-Log10 Cubic      | 7.1923  | -4.2169301442 | 0.82058 | -0.0531 |
|    | C | 96,801  | 329,838 | Log10-Log10 Quadratic  | 0.52351 | -0.2136827375 | 0.0214  |         |
|    | D | 329,839 | 561,106 | Line (C1= m and C2= b) | 0.9911  | 0.0000000385  |         |         |
| 72 | A | 51      | 34,813  | Constant               | 0.99225 |               |         |         |
|    | B | 34,814  | 98,200  | Log10-Log10 Cubic      | 7.09779 | -4.1545002169 | 0.80707 | -0.0521 |
|    | C | 98,201  | 335,591 | Log10-Log10 Quadratic  | 0.52197 | -0.2126534244 | 0.02127 |         |
|    | D | 335,592 | 575,895 | Line (C1= m and C2= b) | 0.9915  | 0.0000000354  |         |         |
| 73 | A | 51      | 35,370  | Constant               | 0.9927  |               |         |         |
|    | B | 35,371  | 99,300  | Log10-Log10 Cubic      | 7.03376 | -4.1099144784 | 0.79705 | -0.0514 |
|    | C | 99,301  | 340,254 | Log10-Log10 Quadratic  | 0.52539 | -0.2135764048 | 0.02132 |         |
|    | D | 340,255 | 575,765 | Line (C1= m and C2= b) | 0.9918  | 0.0000000348  |         |         |
| 74 | A | 51      | 36,018  | Constant               | 0.9932  |               |         |         |
|    | B | 36,019  | 100,800 | Log10-Log10 Cubic      | 6.99902 | -4.0832060246 | 0.79067 | -0.0509 |
|    | C | 100,801 | 345,504 | Log10-Log10 Quadratic  | 0.52529 | -0.2130659515 | 0.02124 |         |
|    | D | 345,505 | 585,587 | Line (C1= m and C2= b) | 0.99221 | 0.0000000325  |         |         |



|           |   |         |         |                        |         |               |         |         |
|-----------|---|---------|---------|------------------------|---------|---------------|---------|---------|
| <b>75</b> | A | 51      | 36,522  | Constant               | 0.99361 |               |         |         |
|           | B | 36,523  | 102,500 | Log10-Log10 Cubic      | 6.86536 | -3.9991967230 | 0.77326 | -0.0497 |
|           | C | 102,501 | 349,203 | Log10-Log10 Quadratic  | 0.52159 | -0.2111564225 | 0.02101 |         |
|           | D | 349,204 | 591,502 | Line (C1= m and C2= b) | 0.9924  | 0.0000000314  |         |         |
| <b>76</b> | A | 51      | 37,039  | Constant               | 0.99399 |               |         |         |
|           | B | 37,040  | 103,800 | Log10-Log10 Cubic      | 6.69448 | -3.8924377046 | 0.75121 | -0.0482 |
|           | C | 103,801 | 354,183 | Log10-Log10 Quadratic  | 0.52094 | -0.2104695232 | 0.02091 |         |
|           | D | 354,184 | 601,662 | Line (C1= m and C2= b) | 0.99269 | 0.0000000295  |         |         |
| <b>77</b> | A | 51      | 37,546  | Constant               | 0.99443 |               |         |         |
|           | B | 37,547  | 105,300 | Log10-Log10 Cubic      | 6.64494 | -3.8591717288 | 0.74398 | -0.0477 |
|           | C | 105,301 | 357,570 | Log10-Log10 Quadratic  | 0.51858 | -0.2091401787 | 0.02074 |         |
|           | D | 357,571 | 604,617 | Line (C1= m and C2= b) | 0.99294 | 0.0000000286  |         |         |
| <b>78</b> | A | 51      | 38,206  | Constant               | 0.99489 |               |         |         |
|           | B | 38,207  | 107,000 | Log10-Log10 Cubic      | 6.49795 | -3.7661270101 | 0.72457 | -0.0463 |
|           | C | 107,001 | 363,649 | Log10-Log10 Quadratic  | 0.51757 | -0.2082500928 | 0.02062 |         |
|           | D | 363,650 | 617,499 | Line (C1= m and C2= b) | 0.99332 | 0.0000000263  |         |         |
| <b>79</b> | A | 51      | 38,724  | Constant               | 0.99532 |               |         |         |
|           | B | 38,725  | 108,700 | Log10-Log10 Cubic      | 6.37182 | -3.6878824123 | 0.70856 | -0.0452 |
|           | C | 108,701 | 367,386 | Log10-Log10 Quadratic  | 0.51291 | -0.2059898343 | 0.02036 |         |
|           | D | 367,387 | 621,255 | Line (C1= m and C2= b) | 0.99356 | 0.0000000254  |         |         |
| <b>80</b> | A | 51      | 39,257  | Constant               | 0.9957  |               |         |         |
|           | B | 39,258  | 109,900 | Log10-Log10 Cubic      | 6.29415 | -3.6365939507 | 0.69748 | -0.0445 |
|           | C | 109,901 | 373,220 | Log10-Log10 Quadratic  | 0.51513 | -0.2065133822 | 0.02039 |         |
|           | D | 373,221 | 631,524 | Line (C1= m and C2= b) | 0.99394 | 0.0000000235  |         |         |
| <b>81</b> | A | 51      | 39,828  | Constant               | 0.99612 |               |         |         |
|           | B | 39,829  | 111,200 | Log10-Log10 Cubic      | 6.26297 | -3.6137926603 | 0.69222 | -0.0441 |
|           | C | 111,201 | 377,485 | Log10-Log10 Quadratic  | 0.51609 | -0.2065195574 | 0.02036 |         |
|           | D | 377,486 | 639,864 | Line (C1= m and C2= b) | 0.99424 | 0.0000000220  |         |         |
| <b>82</b> | A | 51      | 40,445  | Constant               | 0.99665 |               |         |         |
|           | B | 40,446  | 112,100 | Log10-Log10 Cubic      | 6.26441 | -3.6082197217 | 0.68996 | -0.0438 |
|           | C | 112,101 | 382,122 | Log10-Log10 Quadratic  | 0.52572 | -0.2098929314 | 0.02065 |         |
|           | D | 382,123 | 645,202 | Line (C1= m and C2= b) | 0.99454 | 0.0000000207  |         |         |
| <b>83</b> | A | 51      | 40,908  | Constant               | 0.99695 |               |         |         |
|           | B | 40,909  | 114,000 | Log10-Log10 Cubic      | 5.96683 | -3.4303842131 | 0.65471 | -0.0415 |
|           | C | 114,001 | 385,942 | Log10-Log10 Quadratic  | 0.51611 | -0.2056923349 | 0.02021 |         |
|           | D | 385,943 | 652,058 | Line (C1= m and C2= b) | 0.9947  | 0.0000000199  |         |         |
| <b>84</b> | A | 51      | 41,421  | Constant               | 0.99731 |               |         |         |
|           | B | 41,422  | 115,200 | Log10-Log10 Cubic      | 5.85731 | -3.3622734215 | 0.64074 | -0.0406 |

|    |   |         |         |                        |         |               |         |         |
|----|---|---------|---------|------------------------|---------|---------------|---------|---------|
|    | C | 115,201 | 389,382 | Log10-Log10 Quadratic  | 0.51654 | -0.2054922329 | 0.02016 |         |
|    | D | 389,383 | 655,475 | Line (C1= m and C2= b) | 0.99489 | 0.0000000192  |         |         |
| 85 | A | 51      | 42,021  | Constant               | 0.99777 |               |         |         |
|    | B | 42,022  | 116,800 | Log10-Log10 Cubic      | 5.78353 | -3.3138643315 | 0.63036 | -0.0398 |
|    | C | 116,801 | 397,082 | Log10-Log10 Quadratic  | 0.51653 | -0.2051295229 | 0.0201  |         |
|    | D | 397,083 | 667,679 | Line (C1= m and C2= b) | 0.99543 | 0.0000000169  |         |         |
| 86 | A | 51      | 42,608  | Constant               | 0.99827 |               |         |         |
|    | B | 42,609  | 118,100 | Log10-Log10 Cubic      | 5.71191 | -3.2675558679 | 0.62058 | -0.0392 |
|    | C | 118,101 | 400,738 | Log10-Log10 Quadratic  | 0.51954 | -0.2058833134 | 0.02014 |         |
|    | D | 400,739 | 673,287 | Line (C1= m and C2= b) | 0.99566 | 0.0000000159  |         |         |
| 87 | A | 51      | 43,252  | Constant               | 0.99869 |               |         |         |
|    | B | 43,253  | 119,700 | Log10-Log10 Cubic      | 5.59695 | -3.1959122189 | 0.60587 | -0.0382 |
|    | C | 119,701 | 405,615 | Log10-Log10 Quadratic  | 0.51916 | -0.2053154653 | 0.02005 |         |
|    | D | 405,616 | 684,223 | Line (C1= m and C2= b) | 0.99594 | 0.0000000146  |         |         |
| 88 | A | 51      | 43,713  | Constant               | 0.99907 |               |         |         |
|    | B | 43,714  | 121,800 | Log10-Log10 Cubic      | 5.38796 | -3.0709798288 | 0.58112 | -0.0365 |
|    | C | 121,801 | 409,825 | Log10-Log10 Quadratic  | 0.5126  | -0.2023614945 | 0.01973 |         |
|    | D | 409,826 | 687,322 | Line (C1= m and C2= b) | 0.99615 | 0.0000000139  |         |         |
| 89 | A | 51      | 44,281  | Constant               | 0.99949 |               |         |         |
|    | B | 44,282  | 122,700 | Log10-Log10 Cubic      | 5.31758 | -3.0258954677 | 0.57167 | -0.0359 |
|    | C | 122,701 | 412,400 | Log10-Log10 Quadratic  | 0.51762 | -0.2039370947 | 0.01985 |         |
|    | D | 412,401 | 696,136 | Line (C1= m and C2= b) | 0.9963  | 0.0000000130  |         |         |
| 90 | A | 51      | 44,987  | Constant               | 0.99995 |               |         |         |
|    | B | 44,988  | 124,300 | Log10-Log10 Cubic      | 5.30199 | -3.0127527785 | 0.56842 | -0.0356 |
|    | C | 124,301 | 416,677 | Log10-Log10 Quadratic  | 0.51964 | -0.2043220234 | 0.01986 |         |
|    | D | 416,678 | 702,364 | Line (C1= m and C2= b) | 0.99657 | 0.0000000120  |         |         |
| 91 | A | 51      | 45,470  | Constant               | 1.0003  |               |         |         |
|    | B | 45,471  | 125,700 | Log10-Log10 Cubic      | 5.06191 | -2.8692896607 | 0.53999 | -0.0338 |
|    | C | 125,701 | 421,700 | Log10-Log10 Quadratic  | 0.51717 | -0.2029876934 | 0.0197  |         |
|    | D | 421,701 | 706,736 | Line (C1= m and C2= b) | 0.99682 | 0.0000000111  |         |         |
| 92 | A | 51      | 45,860  | Constant               | 1.00064 |               |         |         |
|    | B | 45,861  | 127,200 | Log10-Log10 Cubic      | 4.80507 | -2.7164303587 | 0.50981 | -0.0318 |
|    | C | 127,201 | 427,910 | Log10-Log10 Quadratic  | 0.51405 | -0.2014490218 | 0.01952 |         |
|    | D | 427,911 | 719,371 | Line (C1= m and C2= b) | 0.99716 | 0.0000000098  |         |         |
| 93 | A | 51      | 46,543  | Constant               | 1.00112 |               |         |         |
|    | B | 46,544  | 128,700 | Log10-Log10 Cubic      | 4.76421 | -2.6890651276 | 0.5039  | -0.0314 |
|    | C | 128,701 | 431,187 | Log10-Log10 Quadratic  | 0.51694 | -0.2021510738 | 0.01956 |         |
|    | D | 431,188 | 724,404 | Line (C1= m and C2= b) | 0.99735 | 0.0000000090  |         |         |

|            |   |         |         |                        |         |               |         |         |
|------------|---|---------|---------|------------------------|---------|---------------|---------|---------|
| <b>94</b>  | A | 51      | 47,048  | Constant               | 1.0015  |               |         |         |
|            | B | 47,049  | 130,300 | Log10-Log10 Cubic      | 4.60981 | -2.5970888947 | 0.48576 | -0.0302 |
|            | C | 130,301 | 435,478 | Log10-Log10 Quadratic  | 0.51295 | -0.2002558995 | 0.01935 |         |
|            | D | 435,479 | 729,043 | Line (C1= m and C2= b) | 0.99763 | 0.0000000081  |         |         |
| <b>95</b>  | A | 51      | 47,590  | Constant               | 1.00194 |               |         |         |
|            | B | 47,591  | 131,900 | Log10-Log10 Cubic      | 4.52941 | -2.5473245684 | 0.47562 | -0.0295 |
|            | C | 131,901 | 441,046 | Log10-Log10 Quadratic  | 0.51258 | -0.1997728719 | 0.01928 |         |
|            | D | 441,047 | 737,941 | Line (C1= m and C2= b) | 0.99797 | 0.0000000068  |         |         |
| <b>96</b>  | A | 51      | 48,189  | Constant               | 1.00241 |               |         |         |
|            | B | 48,190  | 132,700 | Log10-Log10 Cubic      | 4.38688 | -2.4593100901 | 0.45769 | -0.0283 |
|            | C | 132,701 | 445,716 | Log10-Log10 Quadratic  | 0.52324 | -0.2035166958 | 0.01961 |         |
|            | D | 445,717 | 743,210 | Line (C1= m and C2= b) | 0.9982  | 0.0000000061  |         |         |
| <b>97</b>  | A | 51      | 48,721  | Constant               | 1.00274 |               |         |         |
|            | B | 48,722  | 134,300 | Log10-Log10 Cubic      | 4.11951 | -2.3013317358 | 0.42672 | -0.0263 |
|            | C | 134,301 | 451,274 | Log10-Log10 Quadratic  | 0.52083 | -0.2022207466 | 0.01945 |         |
|            | D | 451,275 | 751,297 | Line (C1= m and C2= b) | 0.99848 | 0.0000000051  |         |         |
| <b>98</b>  | A | 51      | 49,260  | Constant               | 1.00309 |               |         |         |
|            | B | 49,261  | 136,100 | Log10-Log10 Cubic      | 3.97696 | -2.2166865876 | 0.41008 | -0.0252 |
|            | C | 136,101 | 457,397 | Log10-Log10 Quadratic  | 0.51606 | -0.2000528899 | 0.01922 |         |
|            | D | 457,398 | 762,524 | Line (C1= m and C2= b) | 0.99883 | 0.0000000038  |         |         |
| <b>99</b>  | A | 51      | 49,872  | Constant               | 1.00347 |               |         |         |
|            | B | 49,873  | 137,100 | Log10-Log10 Cubic      | 3.89447 | -2.1659010308 | 0.39979 | -0.0245 |
|            | C | 137,101 | 458,686 | Log10-Log10 Quadratic  | 0.52107 | -0.2016149260 | 0.01934 |         |
|            | D | 458,687 | 764,863 | Line (C1= m and C2= b) | 0.99885 | 0.0000000038  |         |         |
| <b>100</b> | A | 51      | 50,466  | Constant               | 1.00401 |               |         |         |
|            | B | 50,467  | 138,600 | Log10-Log10 Cubic      | 3.8001  | -2.1077345298 | 0.38799 | -0.0237 |
|            | C | 138,601 | 464,514 | Log10-Log10 Quadratic  | 0.52555 | -0.2029655287 | 0.01944 |         |
|            | D | 464,515 | 775,268 | Line (C1= m and C2= b) | 0.99922 | 0.0000000025  |         |         |
| <b>101</b> | A | 51      | 50,940  | Constant               | 1.00436 |               |         |         |
|            | B | 50,941  | 466,383 | Log10-Log10 Cubic      | 3.68304 | -2.0388595083 | 0.37459 | -0.0229 |
|            | C | 466,384 | 779,185 | Line (C1= m and C2= b) | 0.99793 | 0.0000000066  |         |         |
| <b>102</b> | A | 51      | 51,479  | Constant               | 1.00469 |               |         |         |
|            | B | 51,480  | 470,459 | Log10-Log10 Cubic      | 3.50742 | -1.9353228578 | 0.35436 | -0.0215 |
|            | D | 470,460 | 787,993 | Line (C1= m and C2= b) | 0.99821 | 0.0000000056  |         |         |
| <b>103</b> | A | 51      | 52,126  | Constant               | 1.00517 |               |         |         |
|            | B | 52,127  | 475,743 | Log10-Log10 Cubic      | 3.37018 | -1.8532160896 | 0.33812 | -0.0205 |
|            | C | 475,744 | 791,354 | Line (C1= m and C2= b) | 0.99857 | 0.0000000045  |         |         |
| <b>104</b> | A | 51      | 52,691  | Constant               | 1.00561 |               |         |         |

|     |   |         |         |                        |         |               |         |         |
|-----|---|---------|---------|------------------------|---------|---------------|---------|---------|
|     | B | 52,692  | 481,410 | Log10-Log10 Cubic      | 3.20418 | -1.7543260275 | 0.31861 | -0.0192 |
|     | D | 481,411 | 799,404 | Line (C1= m and C2= b) | 0.99894 | 0.0000000033  |         |         |
| 105 | A | 51      | 53,307  | Constant               | 1.00598 |               |         |         |
|     | B | 53,308  | 485,652 | Log10-Log10 Cubic      | 3.03169 | -1.6530714656 | 0.29893 | -0.0179 |
|     | C | 485,653 | 806,287 | Line (C1= m and C2= b) | 0.99921 | 0.0000000025  |         |         |
| 106 | A | 51      | 53,985  | Constant               | 1.00649 |               |         |         |
|     | B | 53,986  | 492,716 | Log10-Log10 Cubic      | 2.97155 | -1.6143284675 | 0.29078 | -0.0174 |
|     | D | 492,717 | 813,671 | Line (C1= m and C2= b) | 0.99967 | 0.0000000010  |         |         |
| 107 | A | 51      | 54,349  | Constant               | 1.00679 |               |         |         |
|     | B | 54,350  | 495,613 | Log10-Log10 Cubic      | 2.64157 | -1.4246620667 | 0.2546  | -0.0151 |
|     | C | 495,614 | 823,601 | Line (C1= m and C2= b) | 0.9999  | 0.0000000003  |         |         |
| 108 | A | 51      | 55,055  | Constant               | 1.00729 |               |         |         |
|     | B | 55,056  | 501,529 | Log10-Log10 Cubic      | 2.4058  | -1.2861637866 | 0.22764 | -0.0133 |
|     | D | 501,530 | 829,938 | Line (C1= m and C2= b) | 1.00028 | -0.0000000008 |         |         |
| 109 | A | 51      | 55,663  | Constant               | 1.00729 |               |         |         |
|     | B | 55,664  | 507,110 | Log10-Log10 Cubic      | 2.44434 | -1.3070106312 | 0.23141 | -0.0136 |
|     | C | 507,111 | 833,015 | Line (C1= m and C2= b) | 1.00027 | -0.0000000008 |         |         |
| 110 | A | 51      | 56,092  | Constant               | 1.00805 |               |         |         |
|     | B | 56,093  | 512,027 | Log10-Log10 Cubic      | 2.08966 | -1.1016563185 | 0.19195 | -0.0111 |
|     | D | 512,028 | 842,529 | Line (C1= m and C2= b) | 1.00097 | -0.0000000029 |         |         |
| 111 | A | 51      | 56,737  | Constant               | 1.00855 |               |         |         |
|     | B | 56,738  | 514,519 | Log10-Log10 Cubic      | 1.91349 | -0.9975894506 | 0.17161 | -0.0097 |
|     | C | 514,520 | 847,529 | Line (C1= m and C2= b) | 1.00116 | -0.0000000035 |         |         |
| 112 | A | 51      | 57,273  | Constant               | 1.00885 |               |         |         |
|     | B | 57,274  | 521,729 | Log10-Log10 Cubic      | 1.71257 | -0.8805040568 | 0.14897 | -0.0083 |
|     | D | 521,730 | 860,157 | Line (C1= m and C2= b) | 1.00158 | -0.0000000047 |         |         |
| 113 | A | 51      | 57,808  | Constant               | 1.00928 |               |         |         |
|     | B | 57,809  | 525,322 | Log10-Log10 Cubic      | 1.60704 | -0.8187515723 | 0.13703 | -0.0075 |
|     | C | 525,323 | 863,992 | Line (C1= m and C2= b) | 1.00182 | -0.0000000054 |         |         |
| 114 | A | 51      | 58,351  | Constant               | 1.00978 |               |         |         |
|     | B | 58,352  | 525,735 | Log10-Log10 Cubic      | 1.41992 | -0.7094195331 | 0.11587 | -0.0062 |
|     | D | 525,736 | 870,703 | Line (C1= m and C2= b) | 1.00189 | -0.0000000055 |         |         |
| 115 | A | 51      | 58,992  | Constant               | 1.0102  |               |         |         |
|     | B | 58,993  | 536,310 | Log10-Log10 Cubic      | 1.18247 | -0.5726831283 | 0.08975 | -0.0045 |
|     | C | 536,311 | 882,203 | Line (C1= m and C2= b) | 1.00252 | -0.0000000073 |         |         |
