# Supplementary material for: A Comparison of 100 Human Genes Using an Alu Element-Based Instability Model
Source: PubMed Central journal article supplement (PMC3670932; doi:10.1371/journal.pone.0065188), 2013-06-03

# Ectopic Invasion and Annealing of Complementary DNA Replication Forks

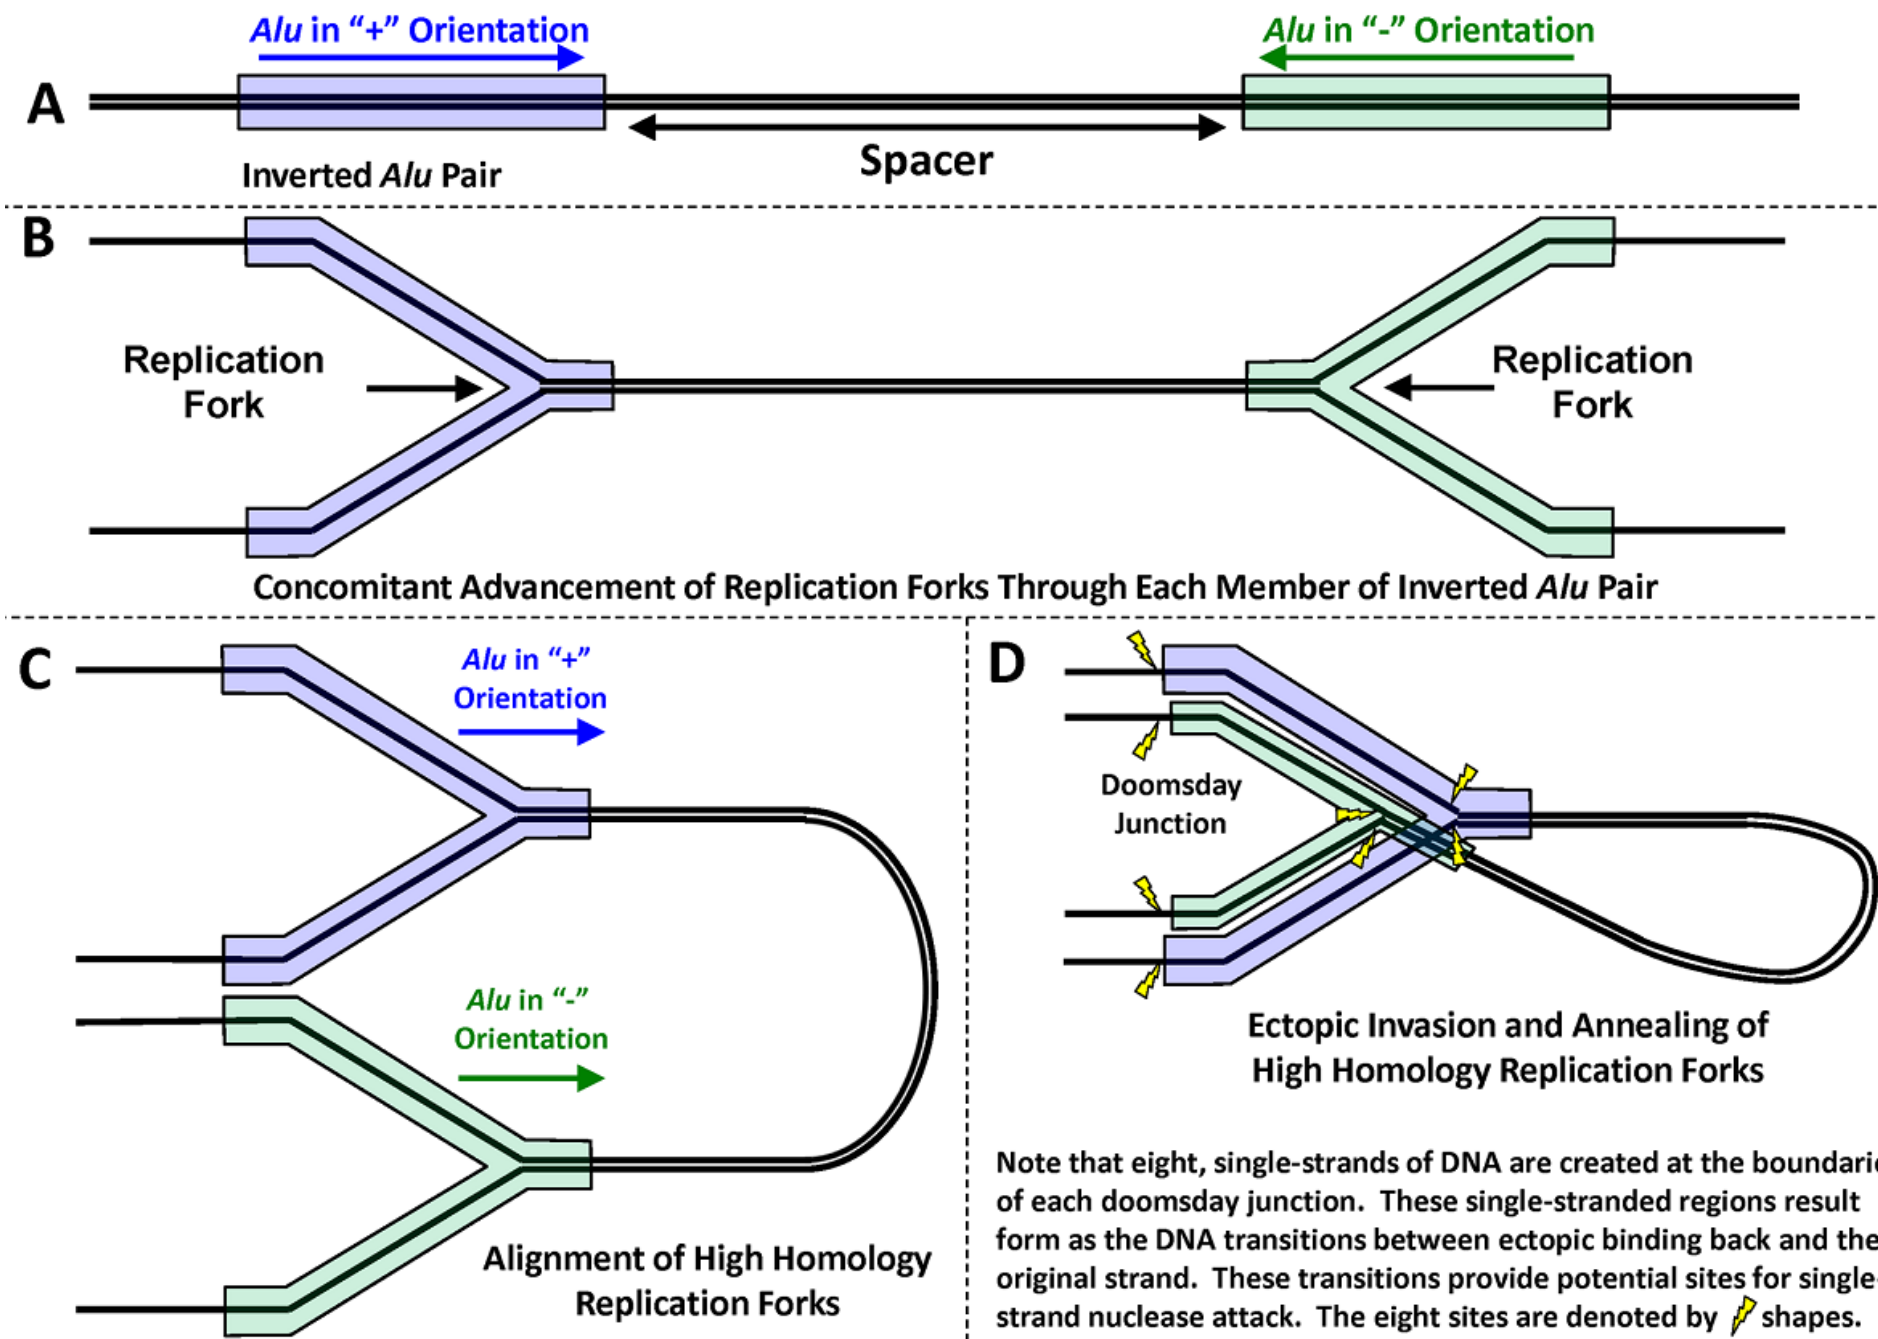

Supplement: pone.0065188.s007.pdf [file pone.0065188.s007.pdf]
