# Supplementary material for: A Comparison of 100 Human Genes Using an Alu Element-Based Instability Model
Source: PubMed Central journal article supplement (PMC3670932; doi:10.1371/journal.pone.0065188), 2013-06-03

**A**

# I:D Ratio versus Spacer Size

for Type 2, Clustered, *Alu* Pairs (275-325 bp), APSNs +/- 110

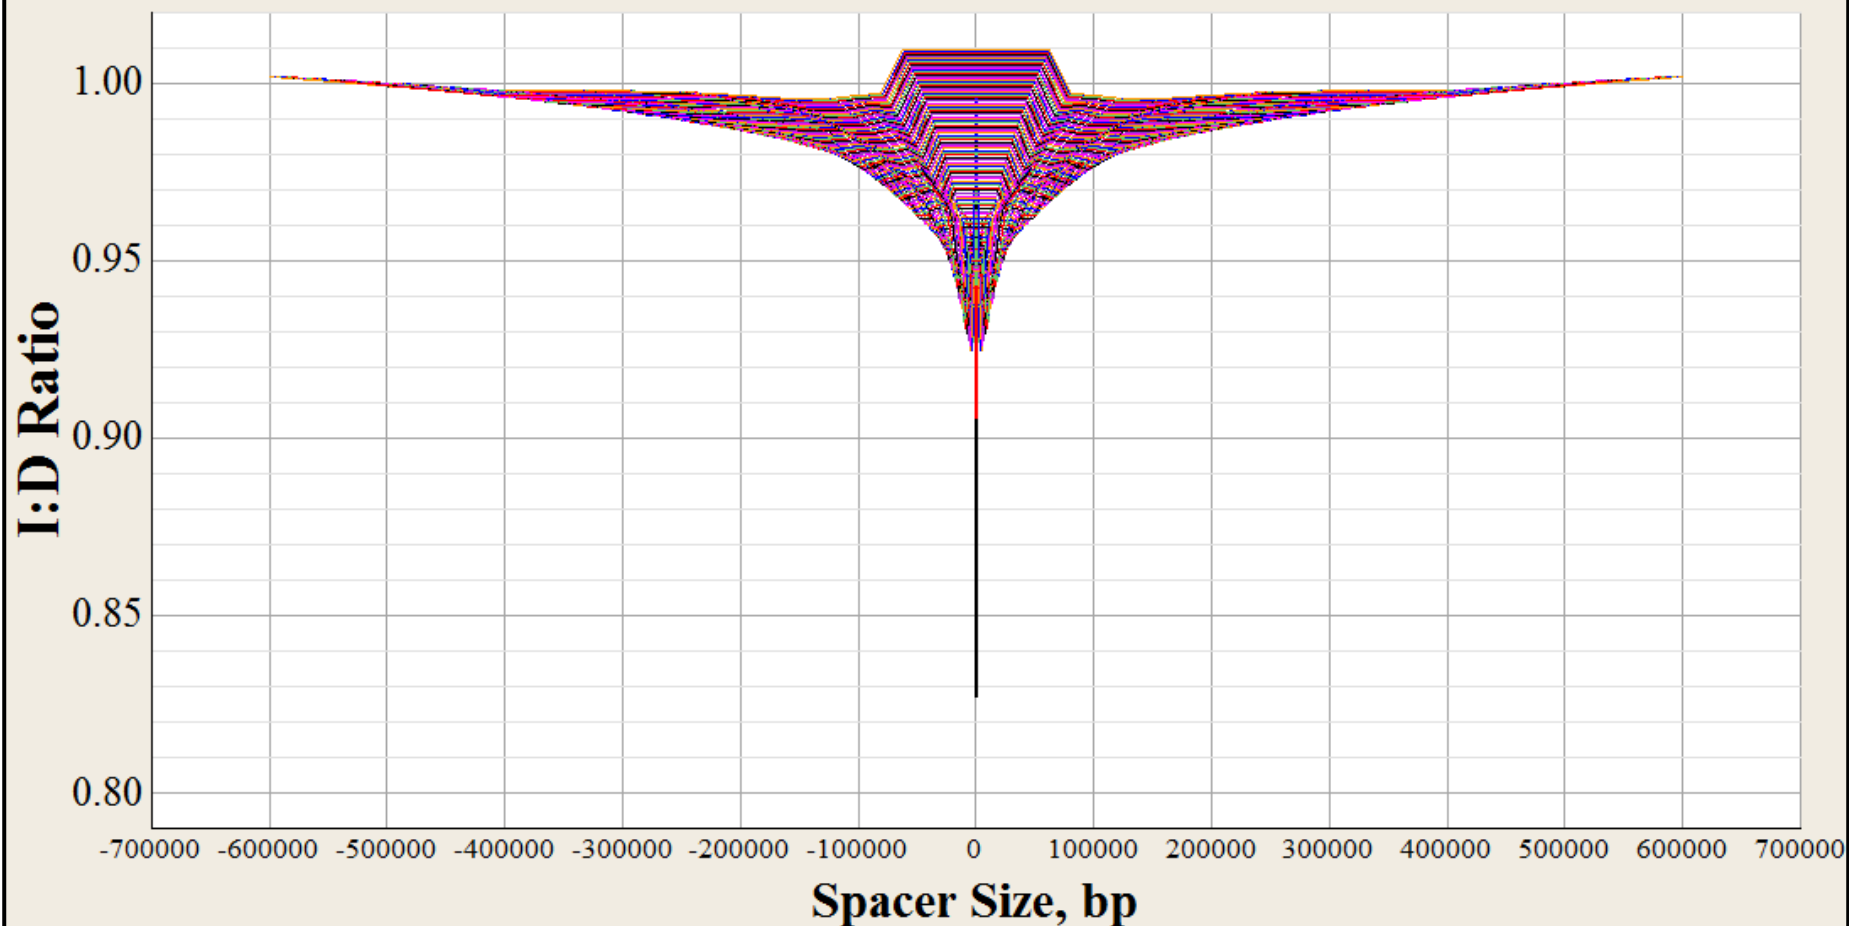

**B**

# I:D Ratio versus Spacer Size

for Type 3, Clustered, *Alu* Pairs (275-325 bp), APSNs +/- 110

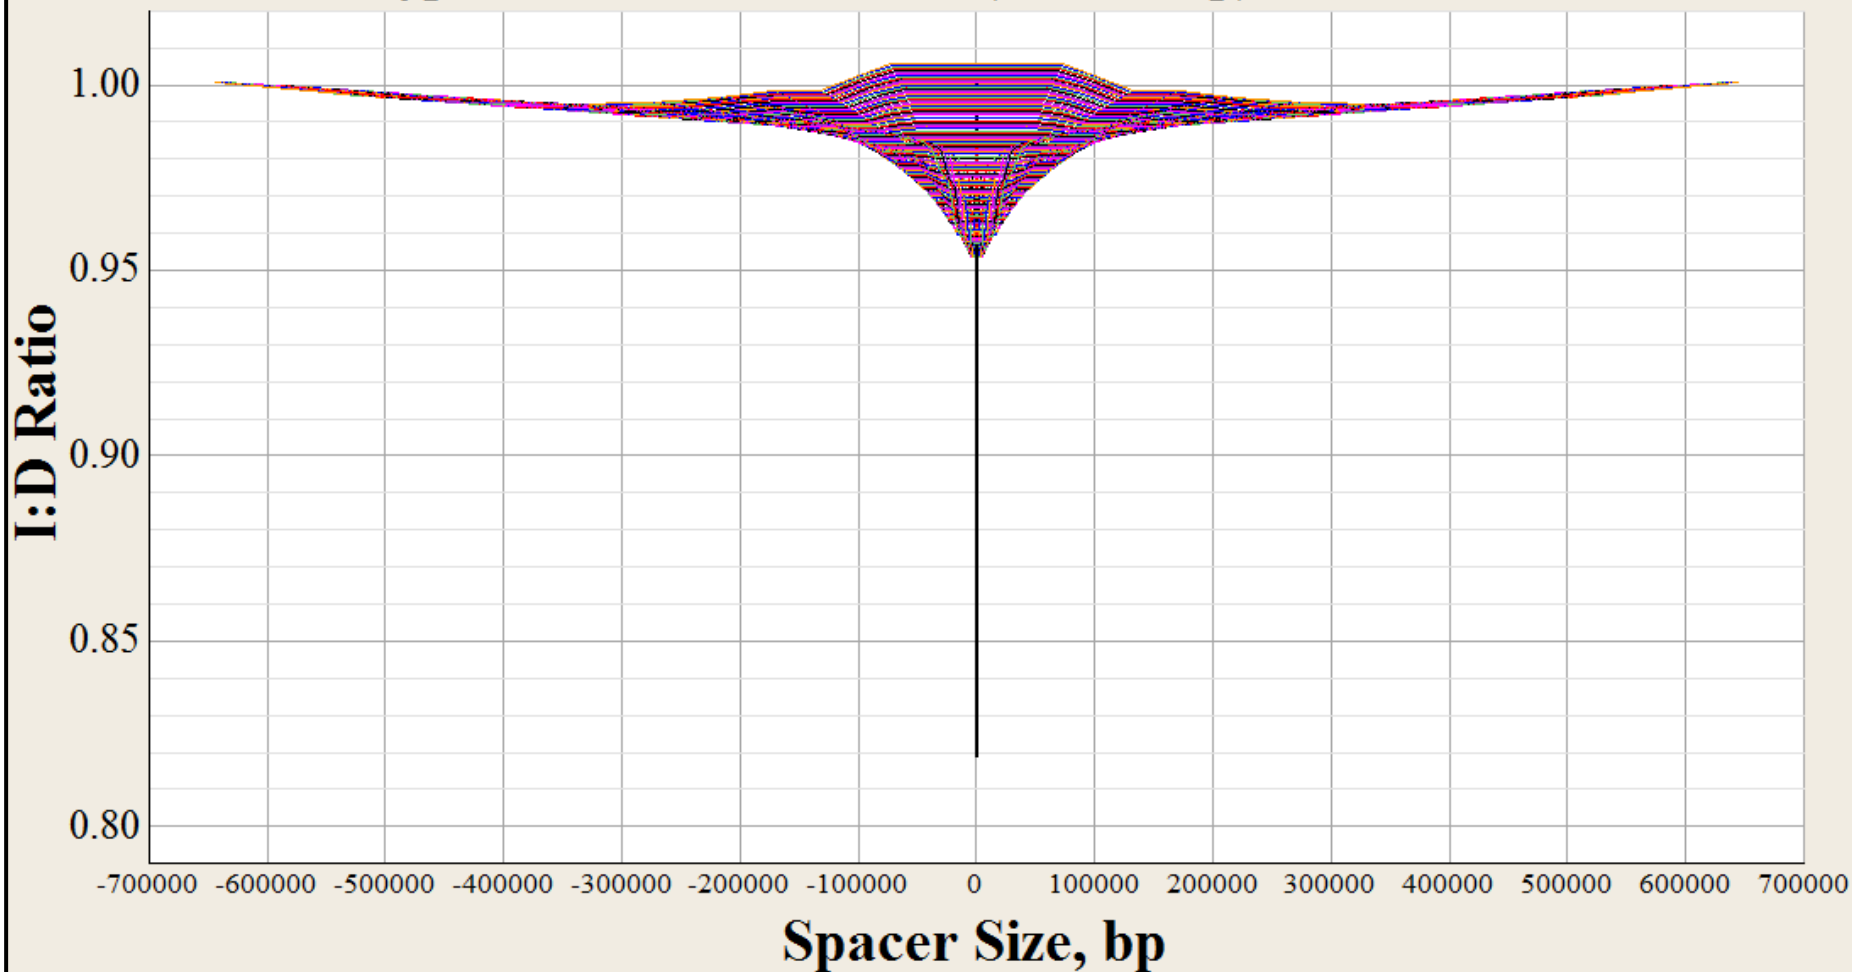

Supplement: pone.0065188.s008.pdf [file pone.0065188.s008.pdf]
