# Supplementary material for: A Comparison of 100 Human Genes Using an Alu Element-Based Instability Model
Source: PubMed Central journal article supplement (PMC3670932; doi:10.1371/journal.pone.0065188), 2013-06-03

# *Alu* Pair I:D Ratio vs Type 1, 2 and 3 *Alu* Pairs

*(actual vs regressed data for large-large Alu pairs, 275-375 bp)*

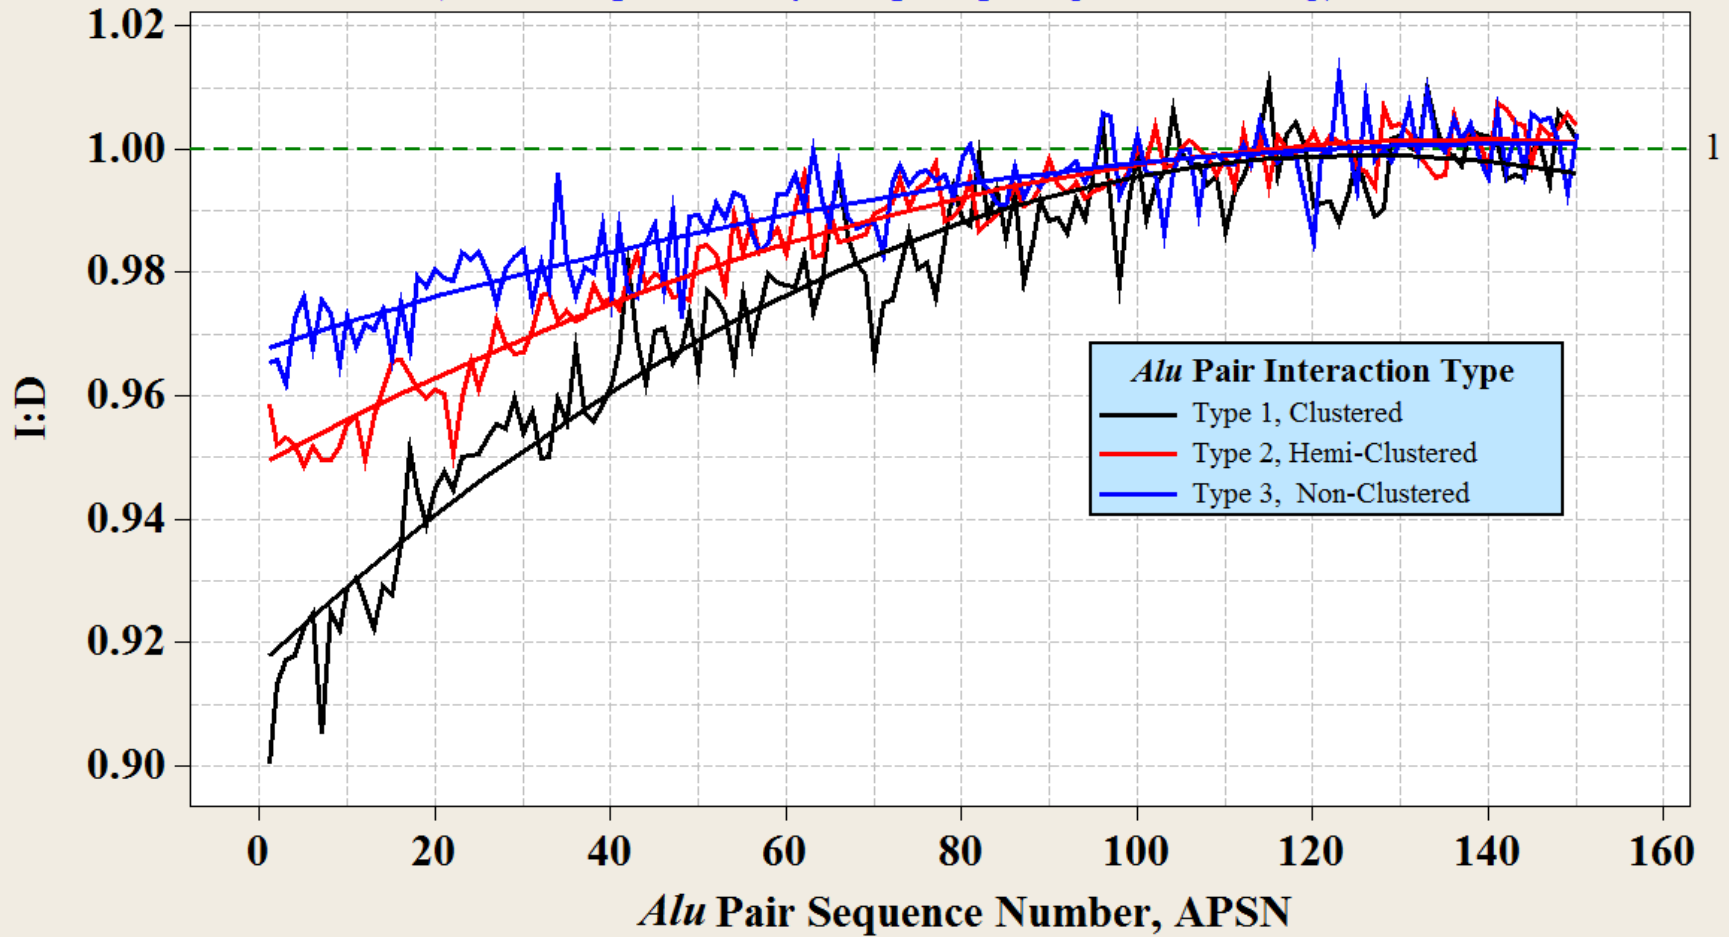

Supplement: pone.0065188.s009.pdf [file pone.0065188.s009.pdf]
