# Supplementary material for: A Comparison of 100 Human Genes Using an Alu Element-Based Instability Model
Source: PubMed Central journal article supplement (PMC3670932; doi:10.1371/journal.pone.0065188), 2013-06-03

**A**

# *APC Alu* Landscape

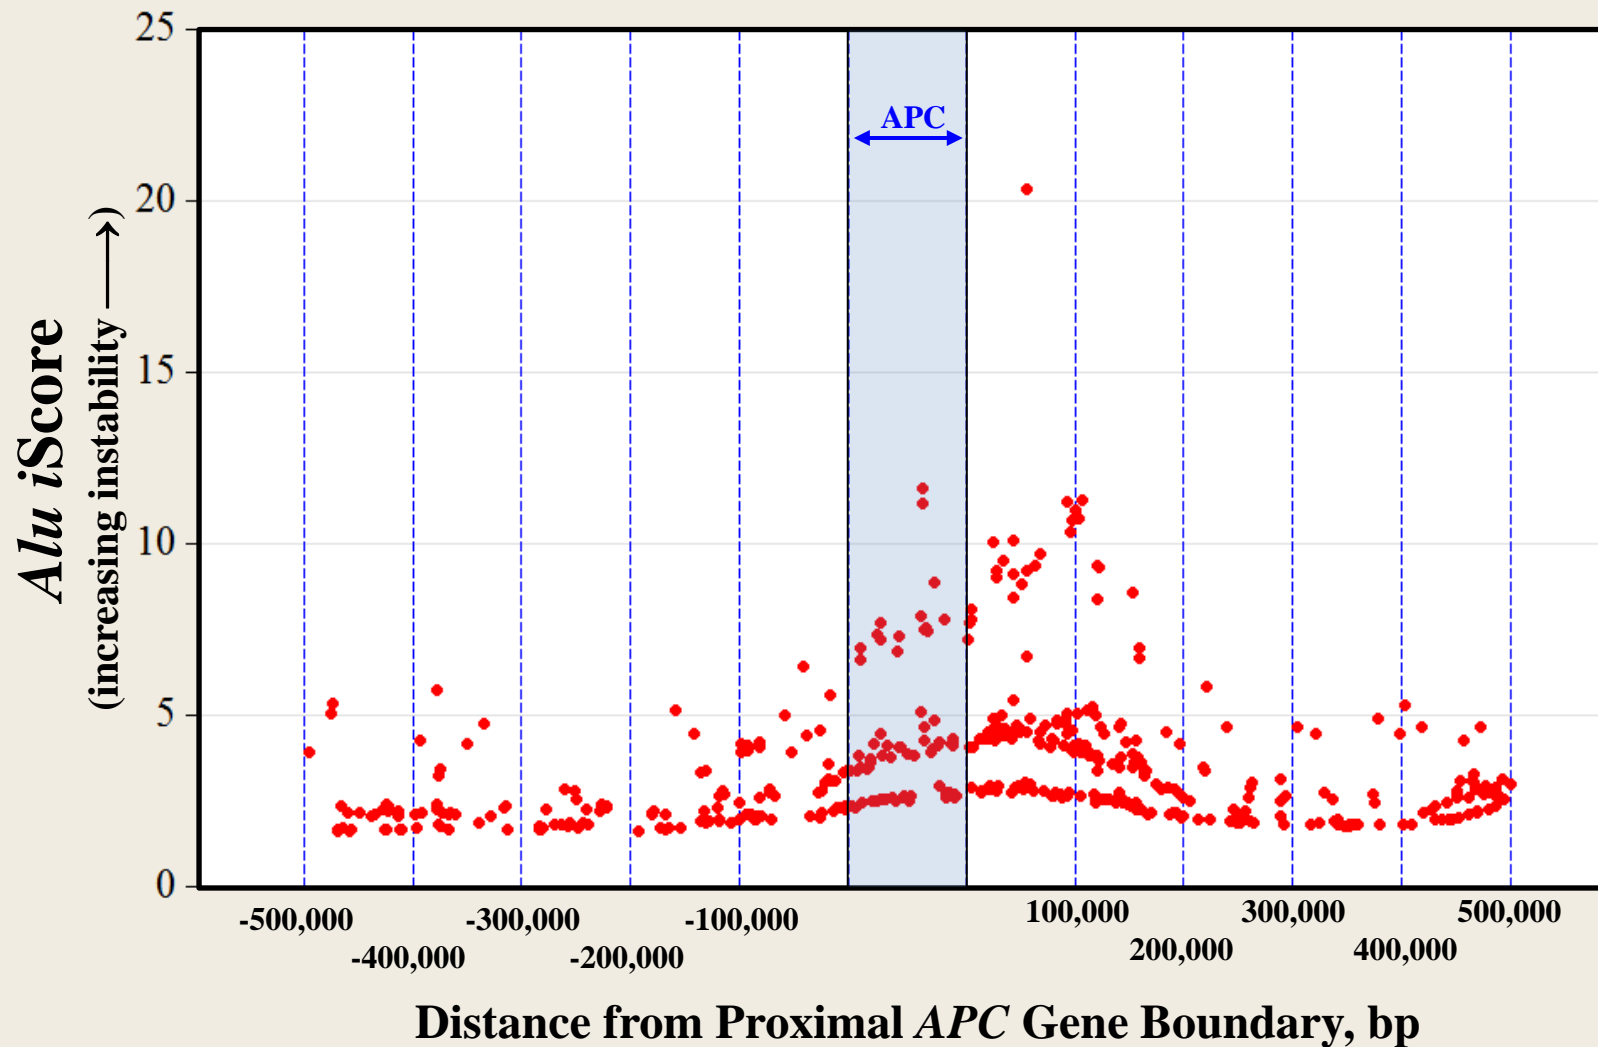

**B**

# *ATM Alu* Landscape

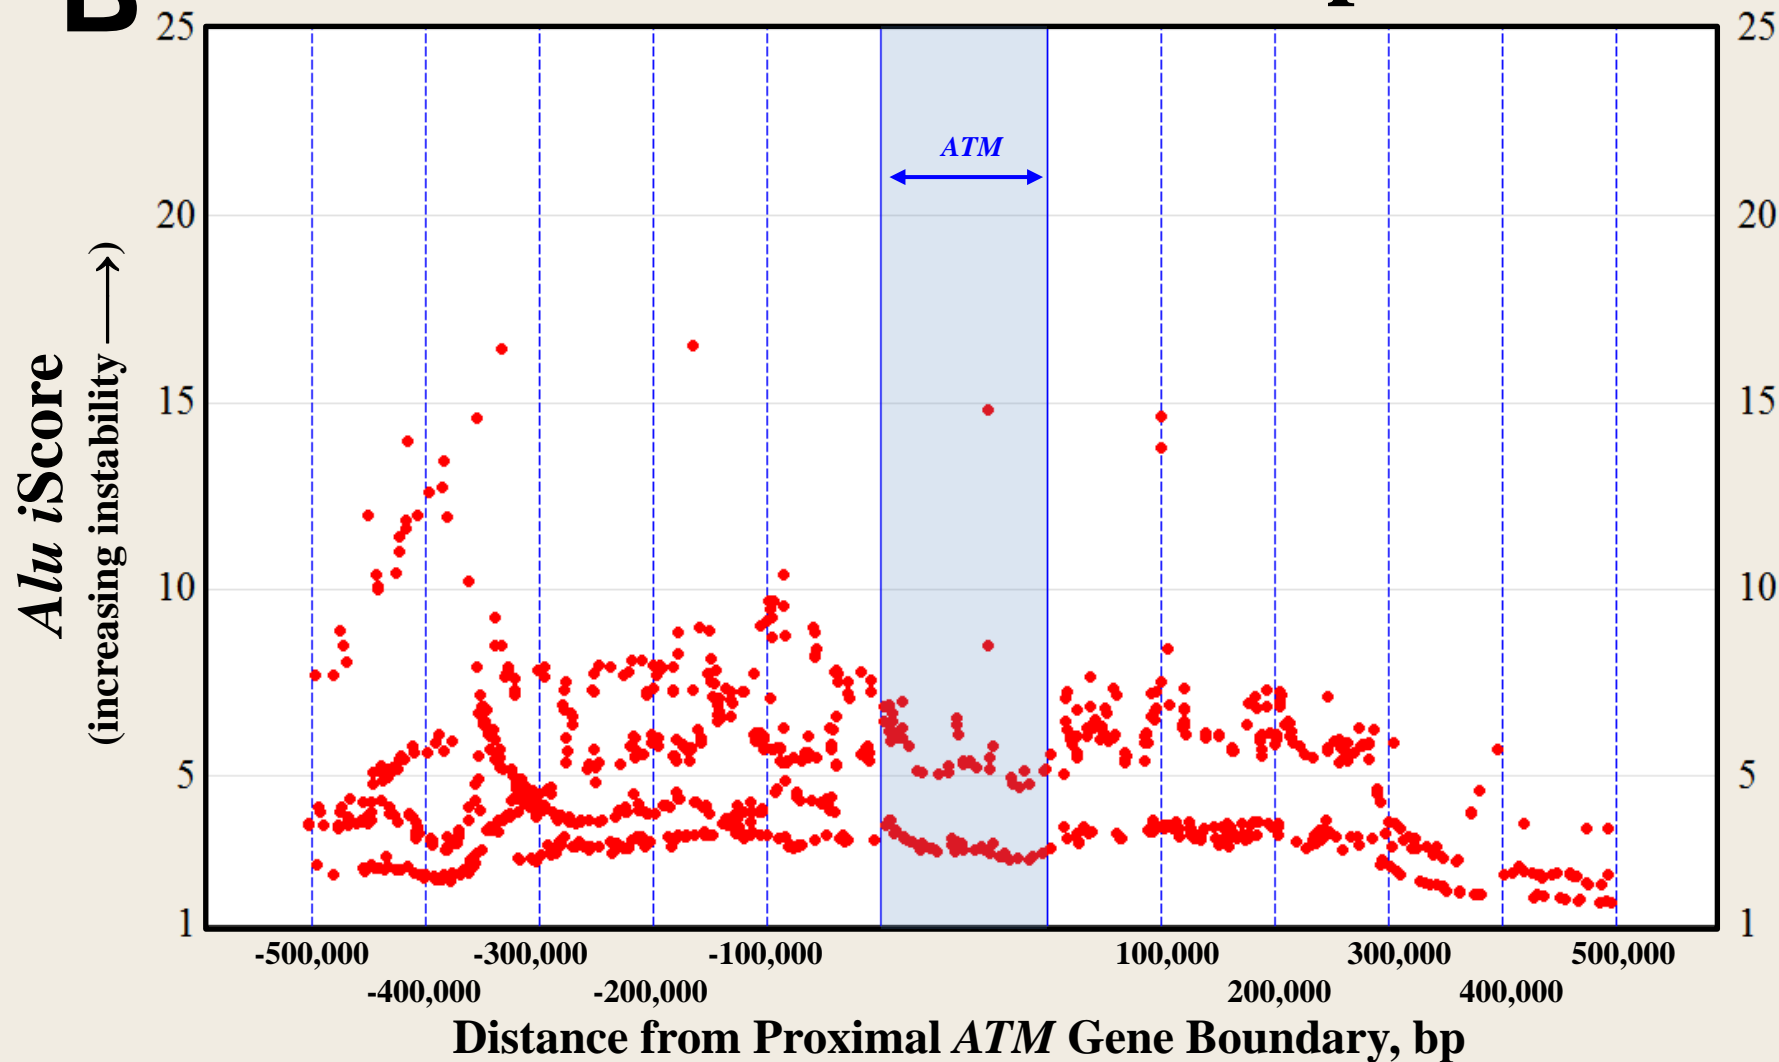

# *MLH1* Alu Landscape

**C**

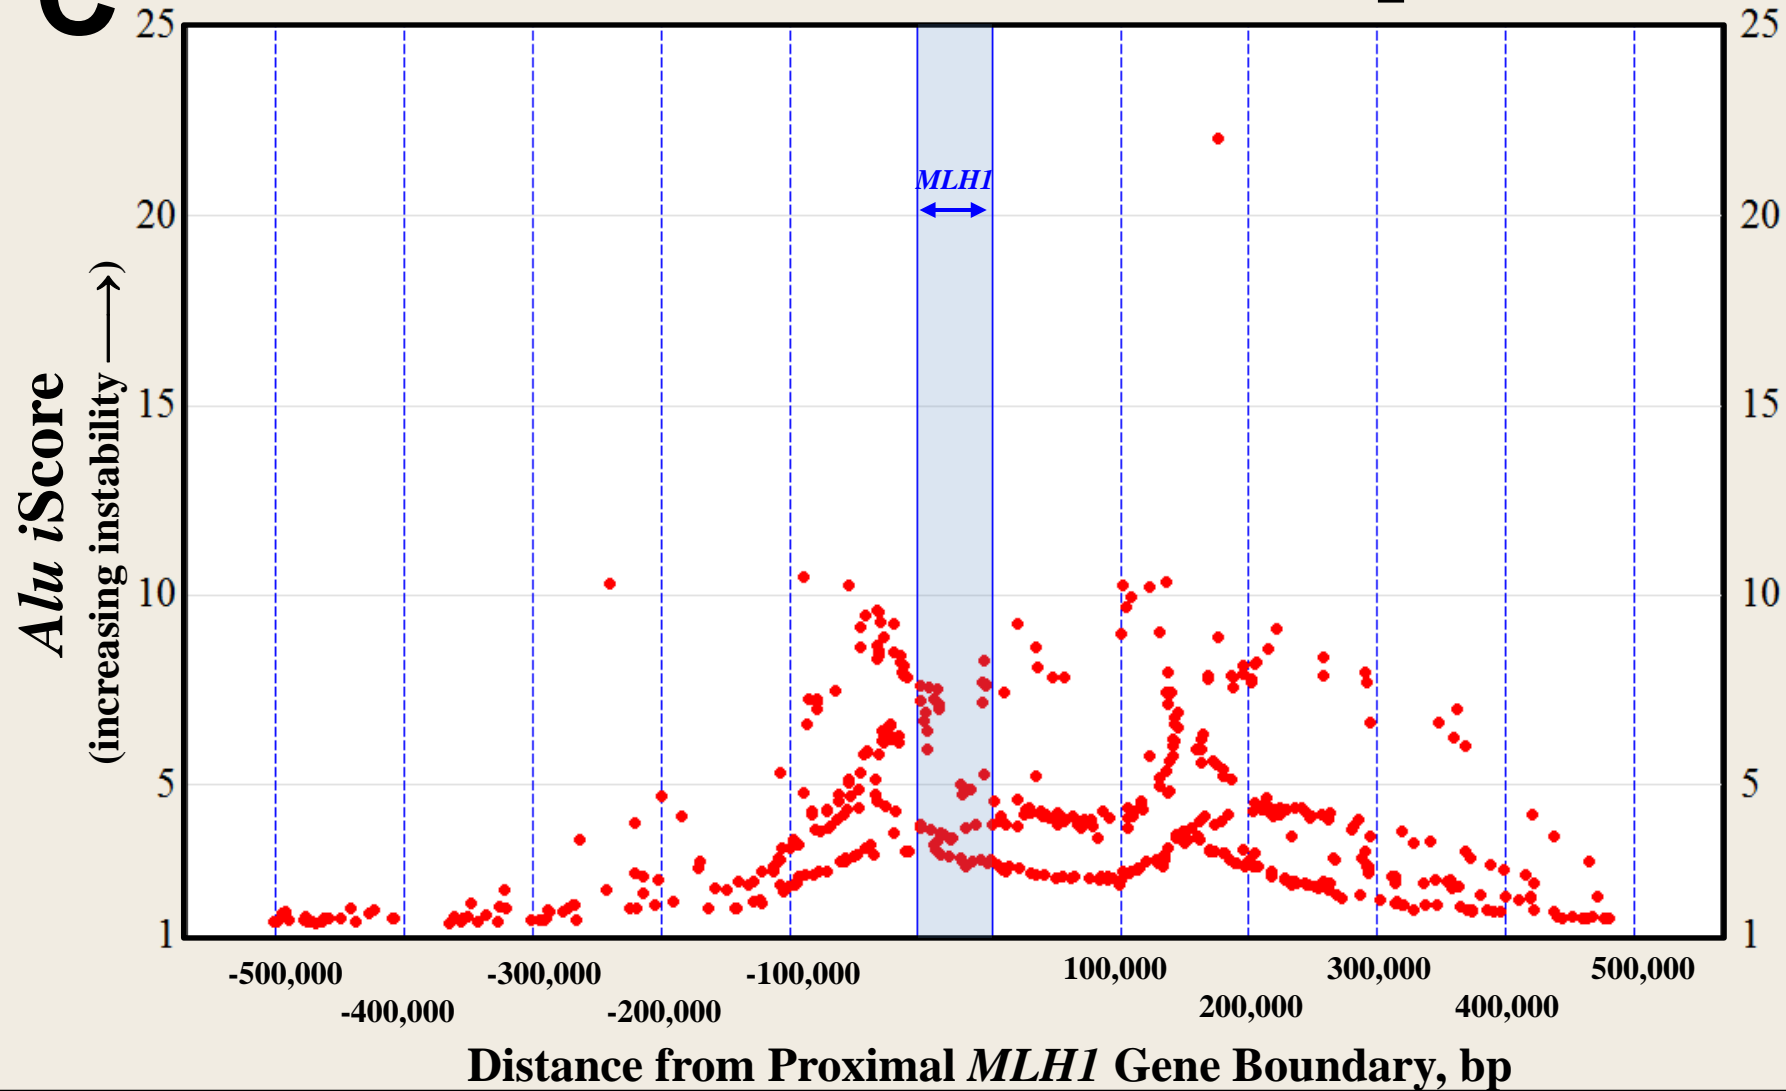

**D**

# *MSH2* Alu Landscape

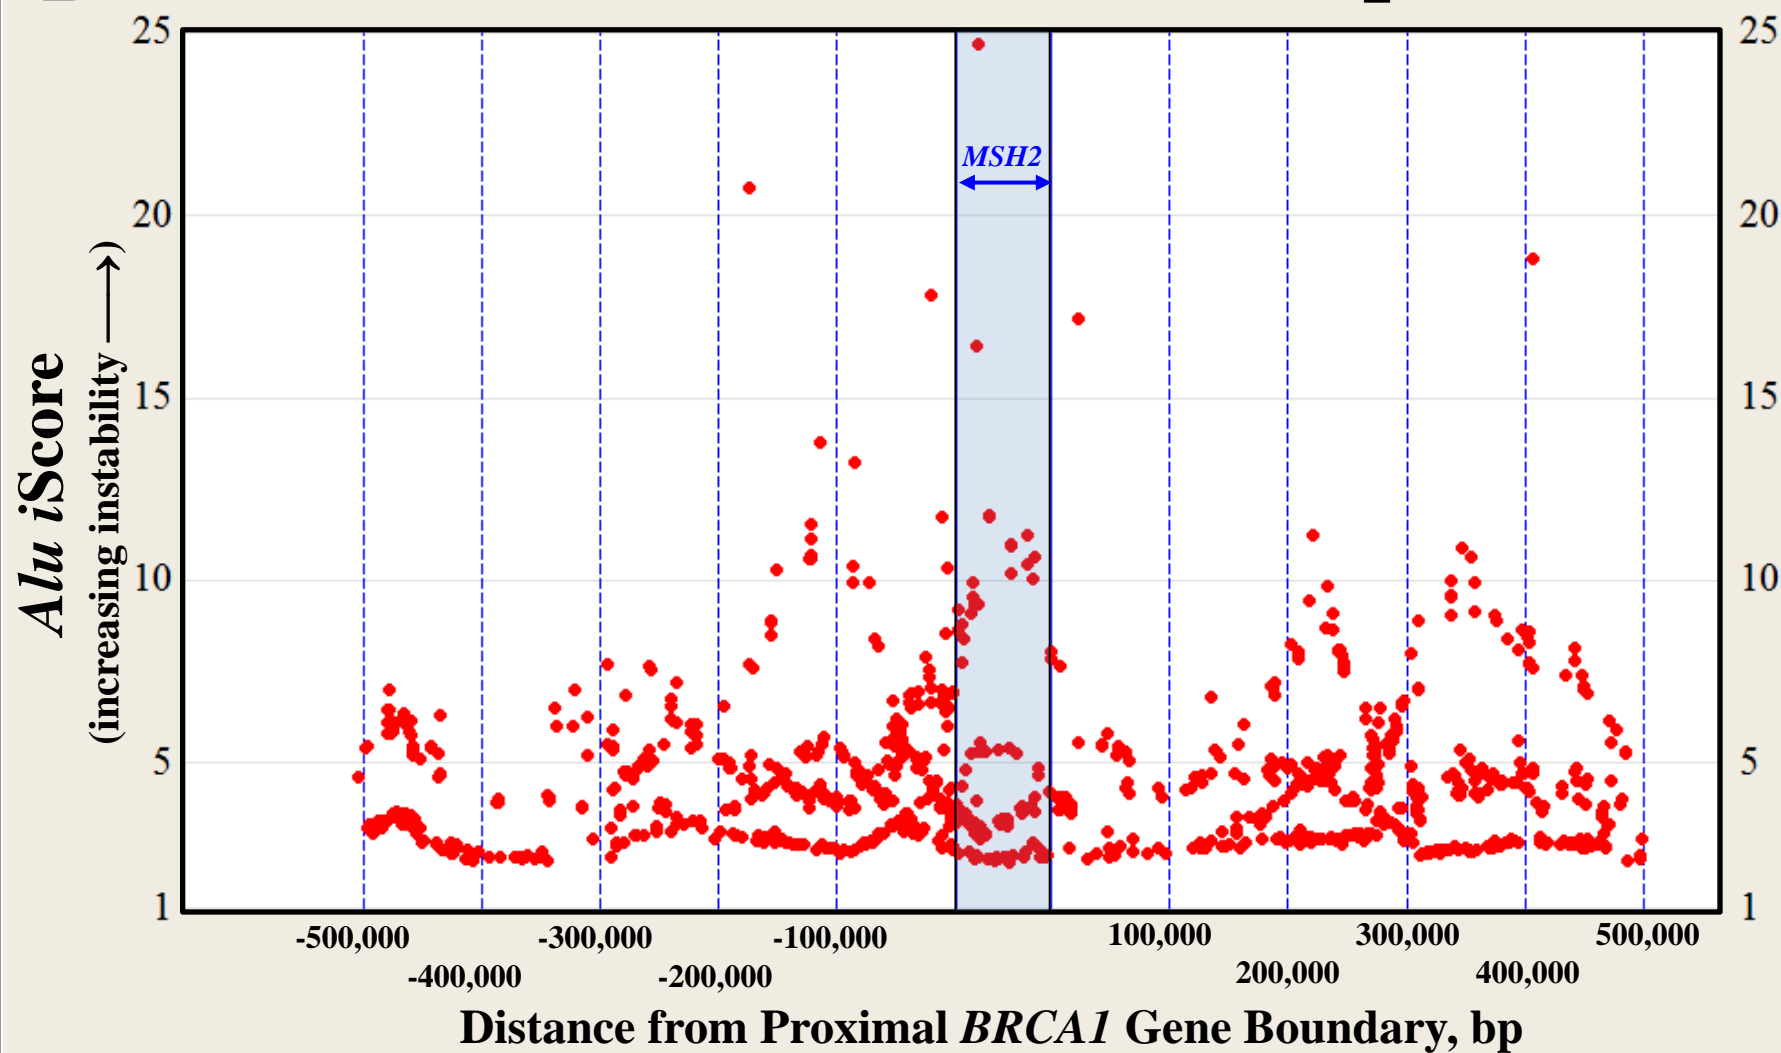

**E**

# *TP53* *Alu* Landscape

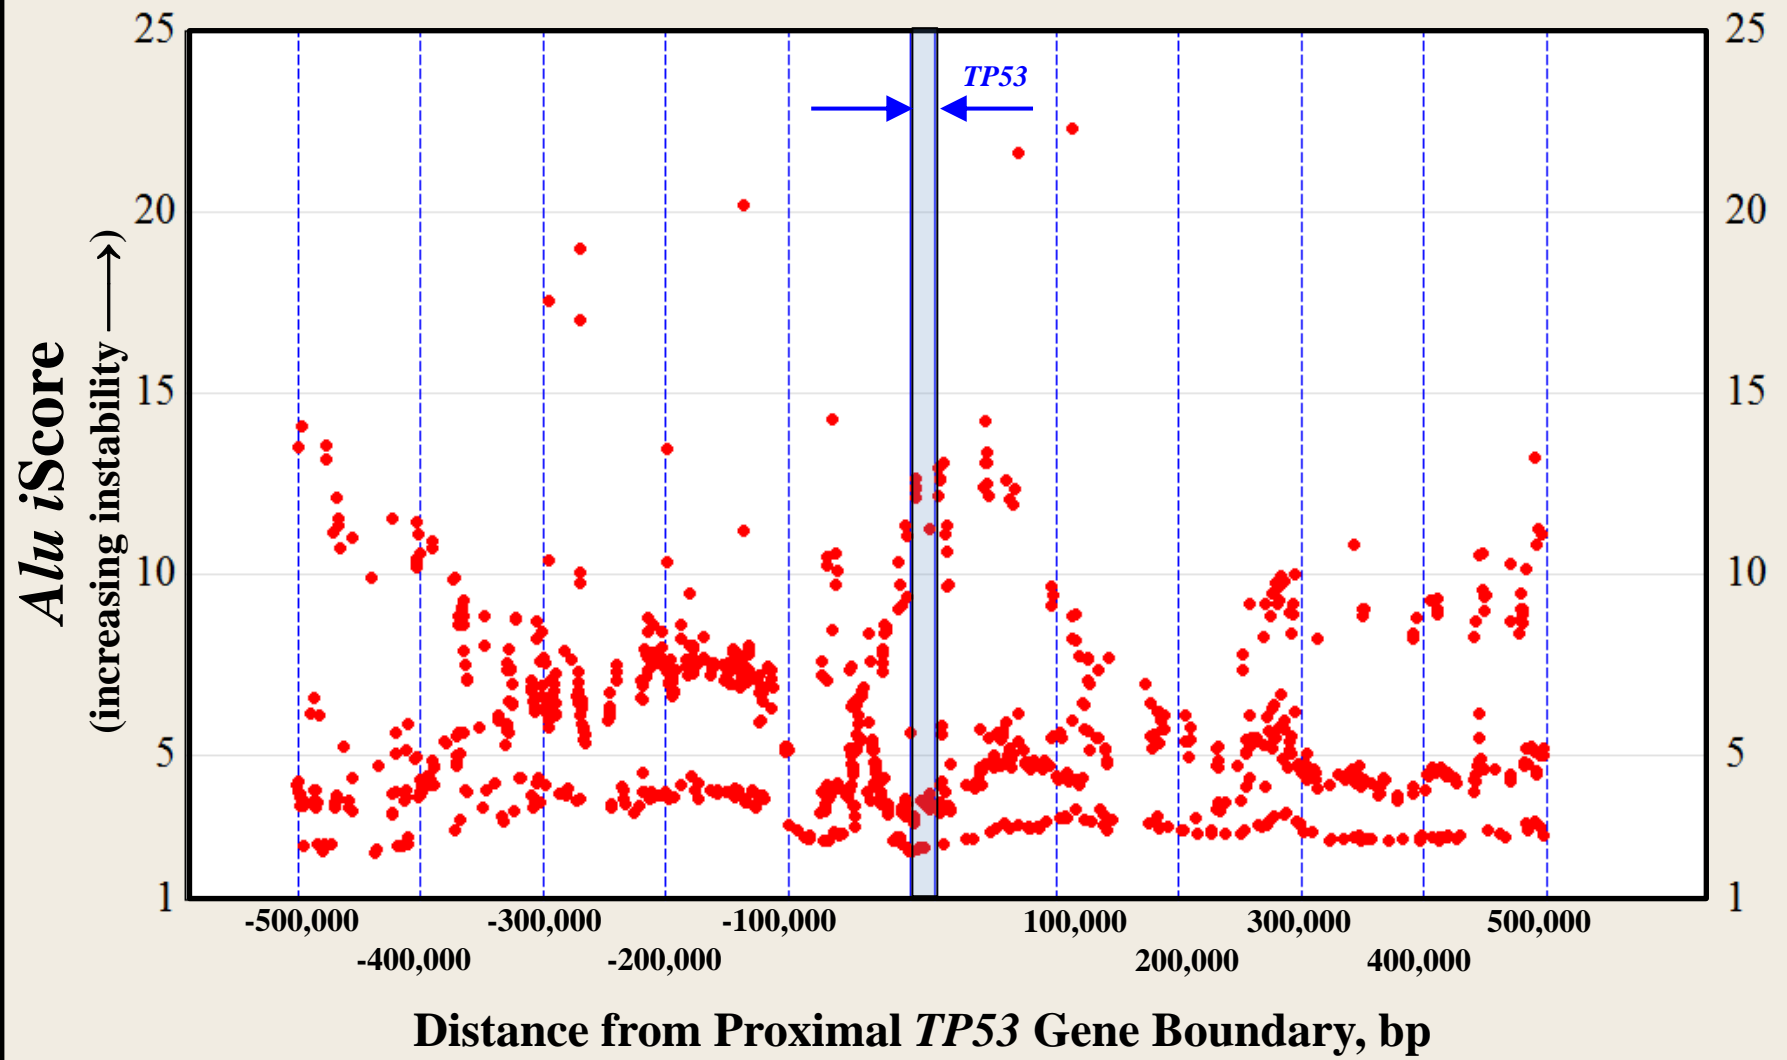

# *GDPD2* Alu Landscape

# F

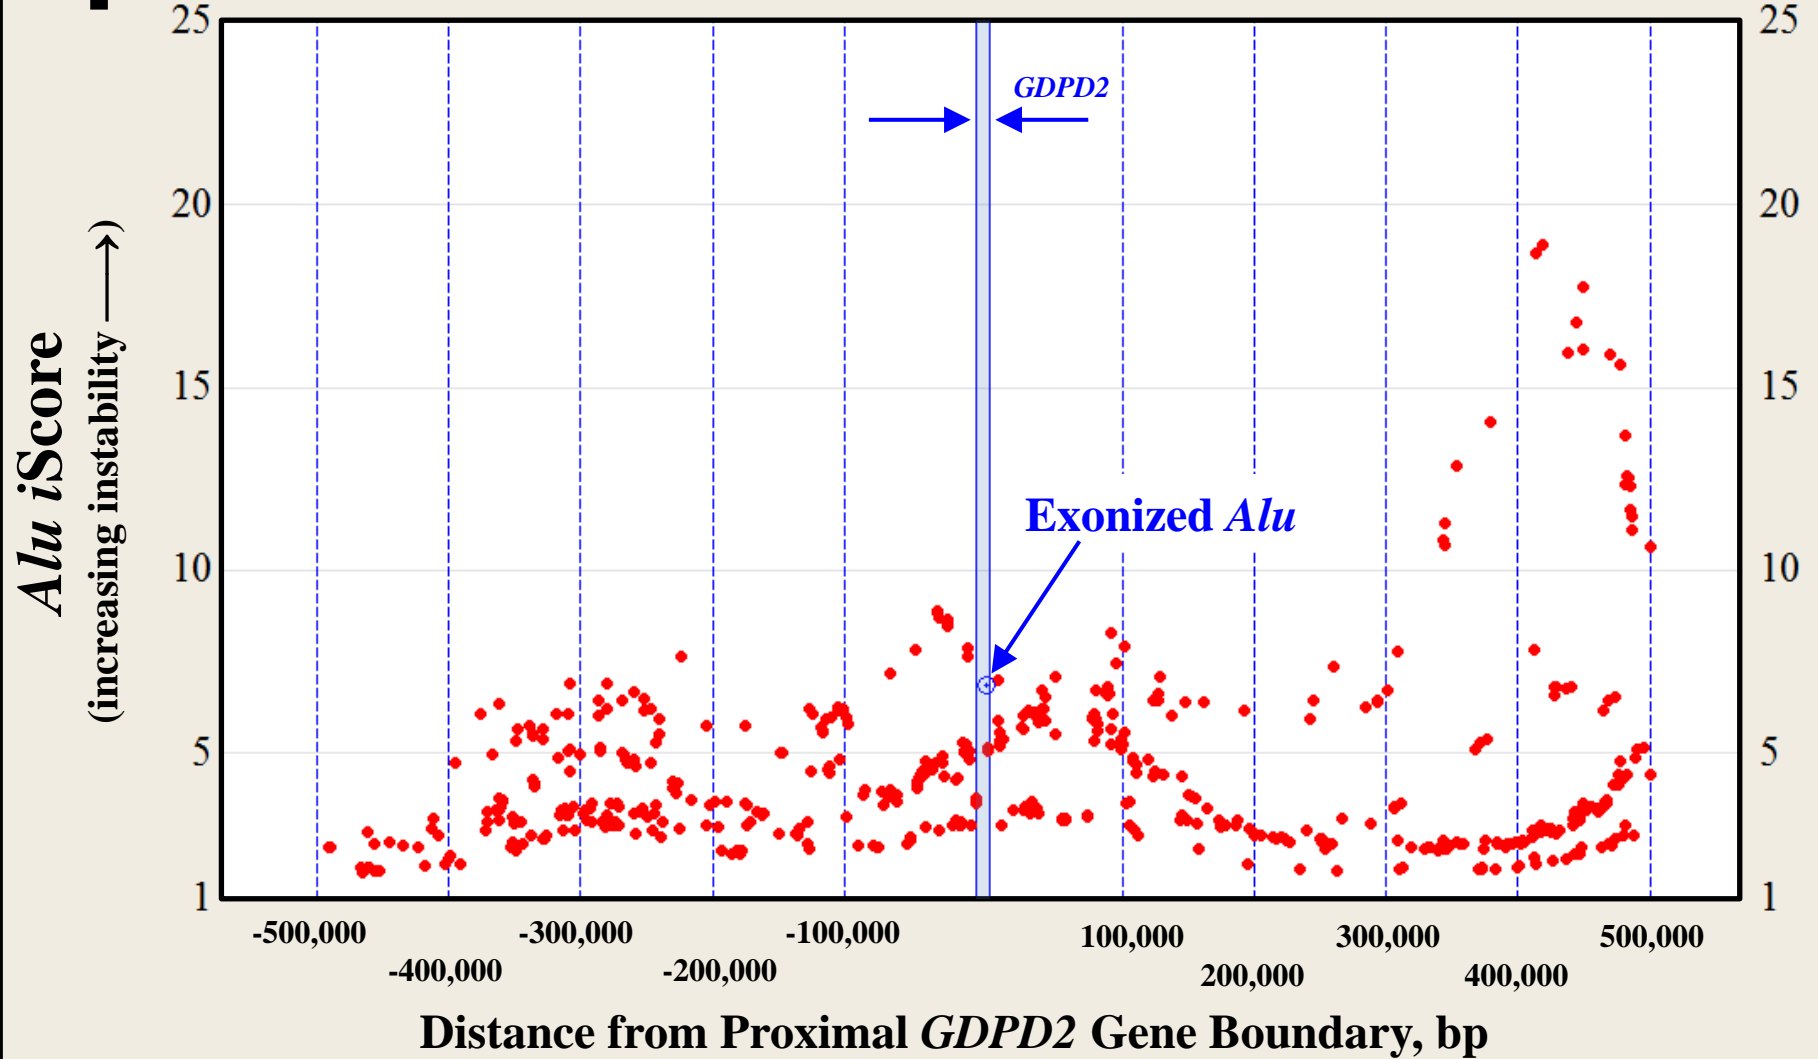

# *KEAP1* Alu Landscape

**G**

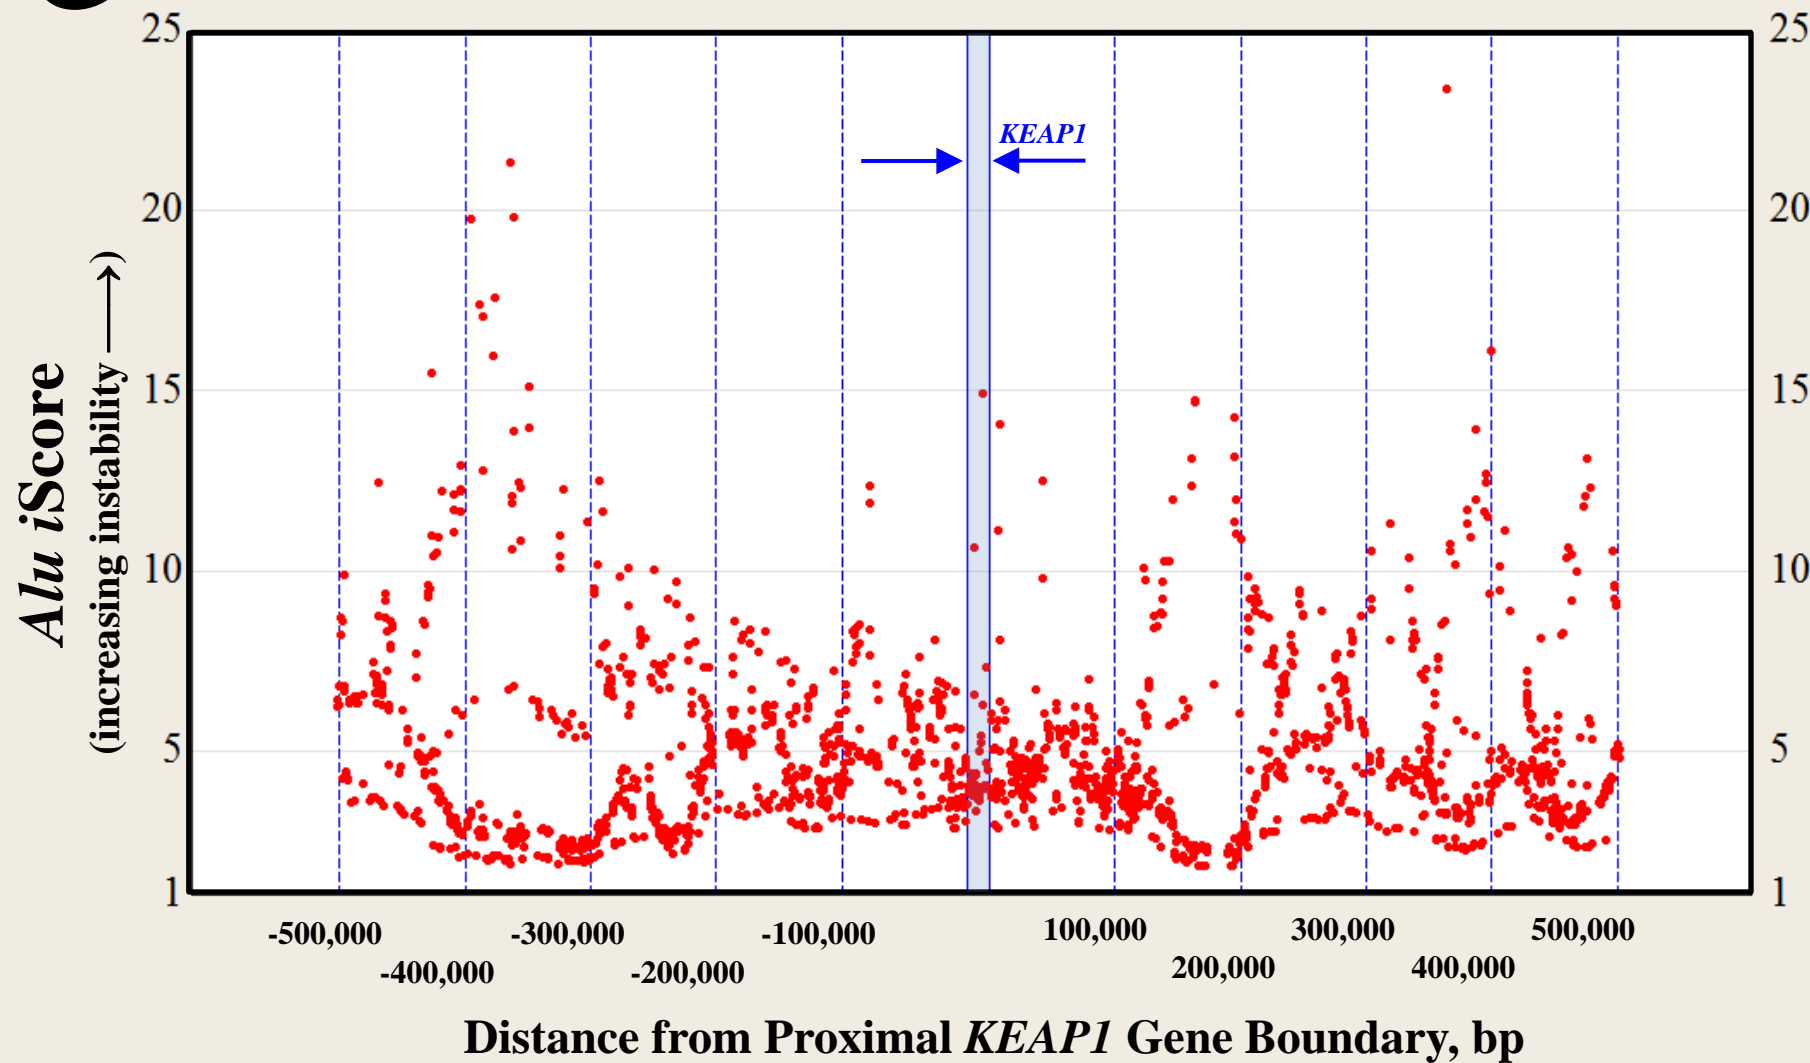

**H**

# *SF3B3* Alu Landscape

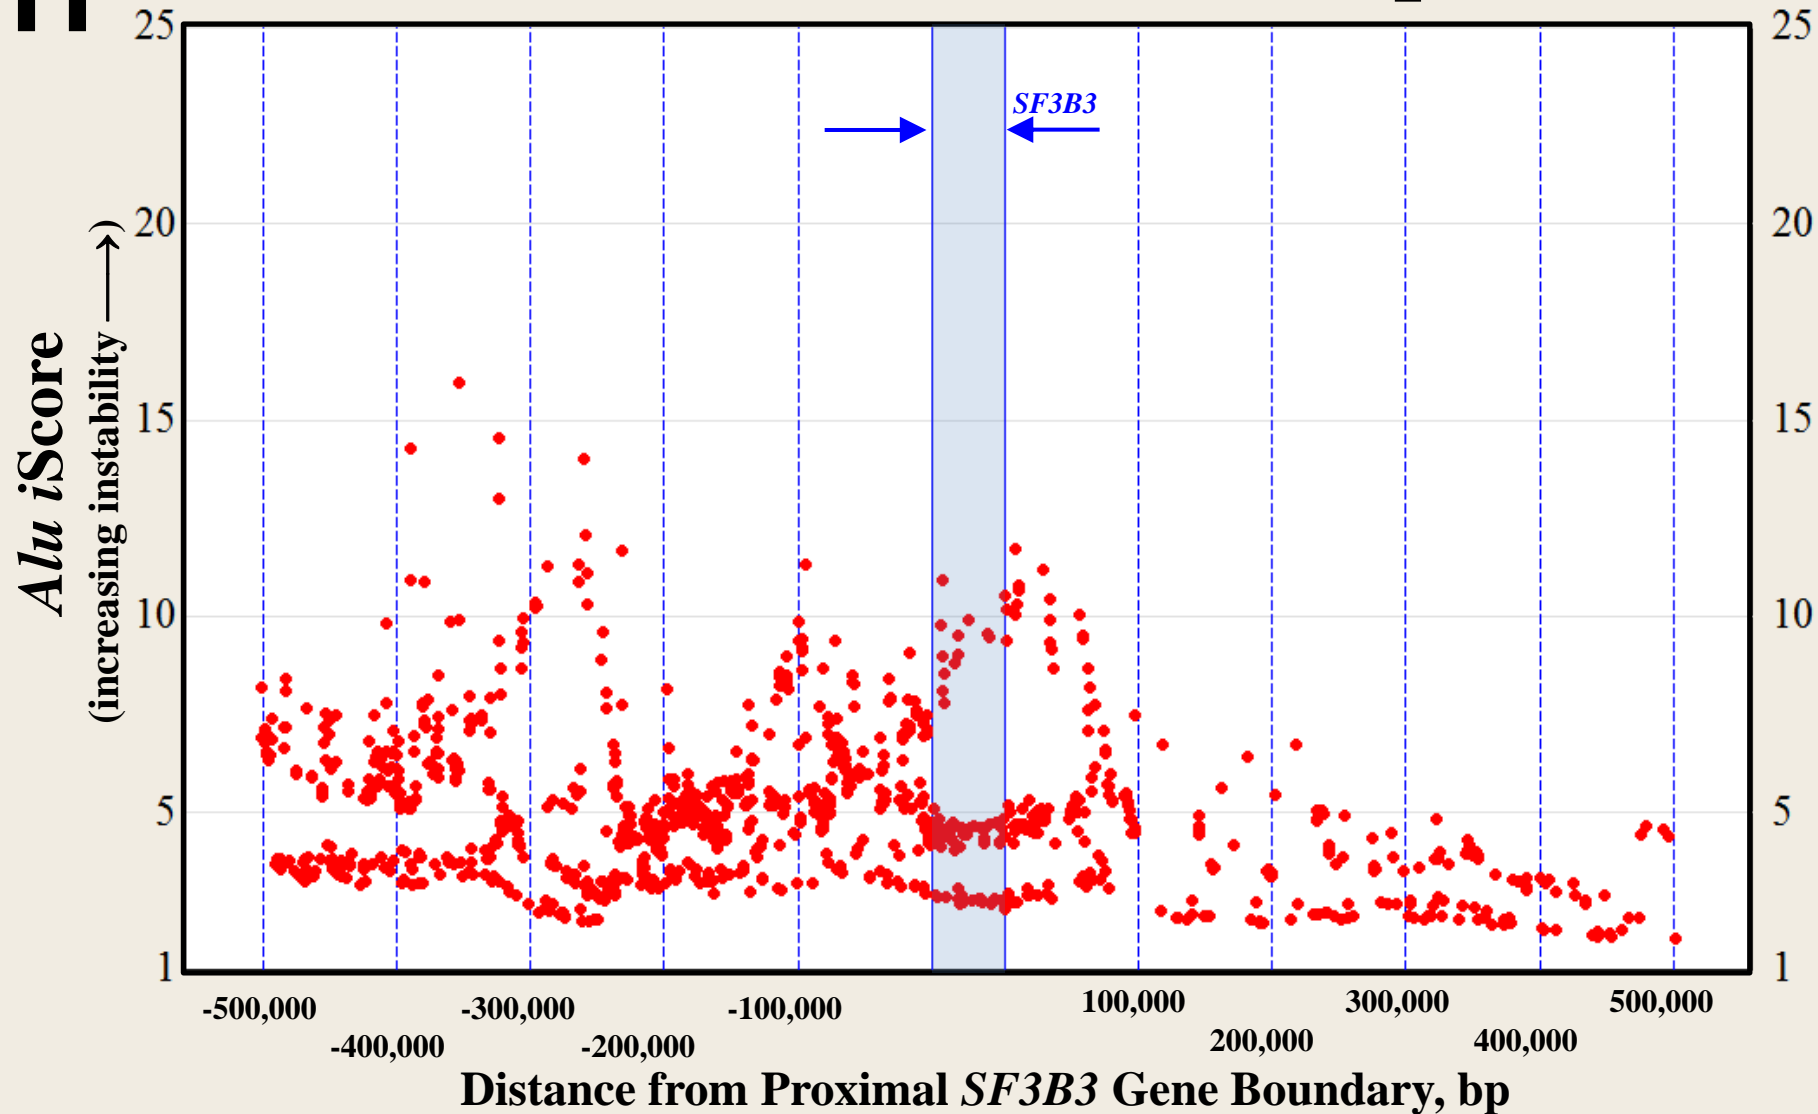

Supplement: pone.0065188.s010.pdf [file pone.0065188.s010.pdf]
