# Supplementary material for: A Comparison of 100 Human Genes Using an Alu Element-Based Instability Model
Source: PubMed Central journal article supplement (PMC3670932; doi:10.1371/journal.pone.0065188), 2013-06-03

# A Relative Exon Stability Distributions, Deletion-Prone Genes

*(plotted in order of most unstable exon, left-to-right)*

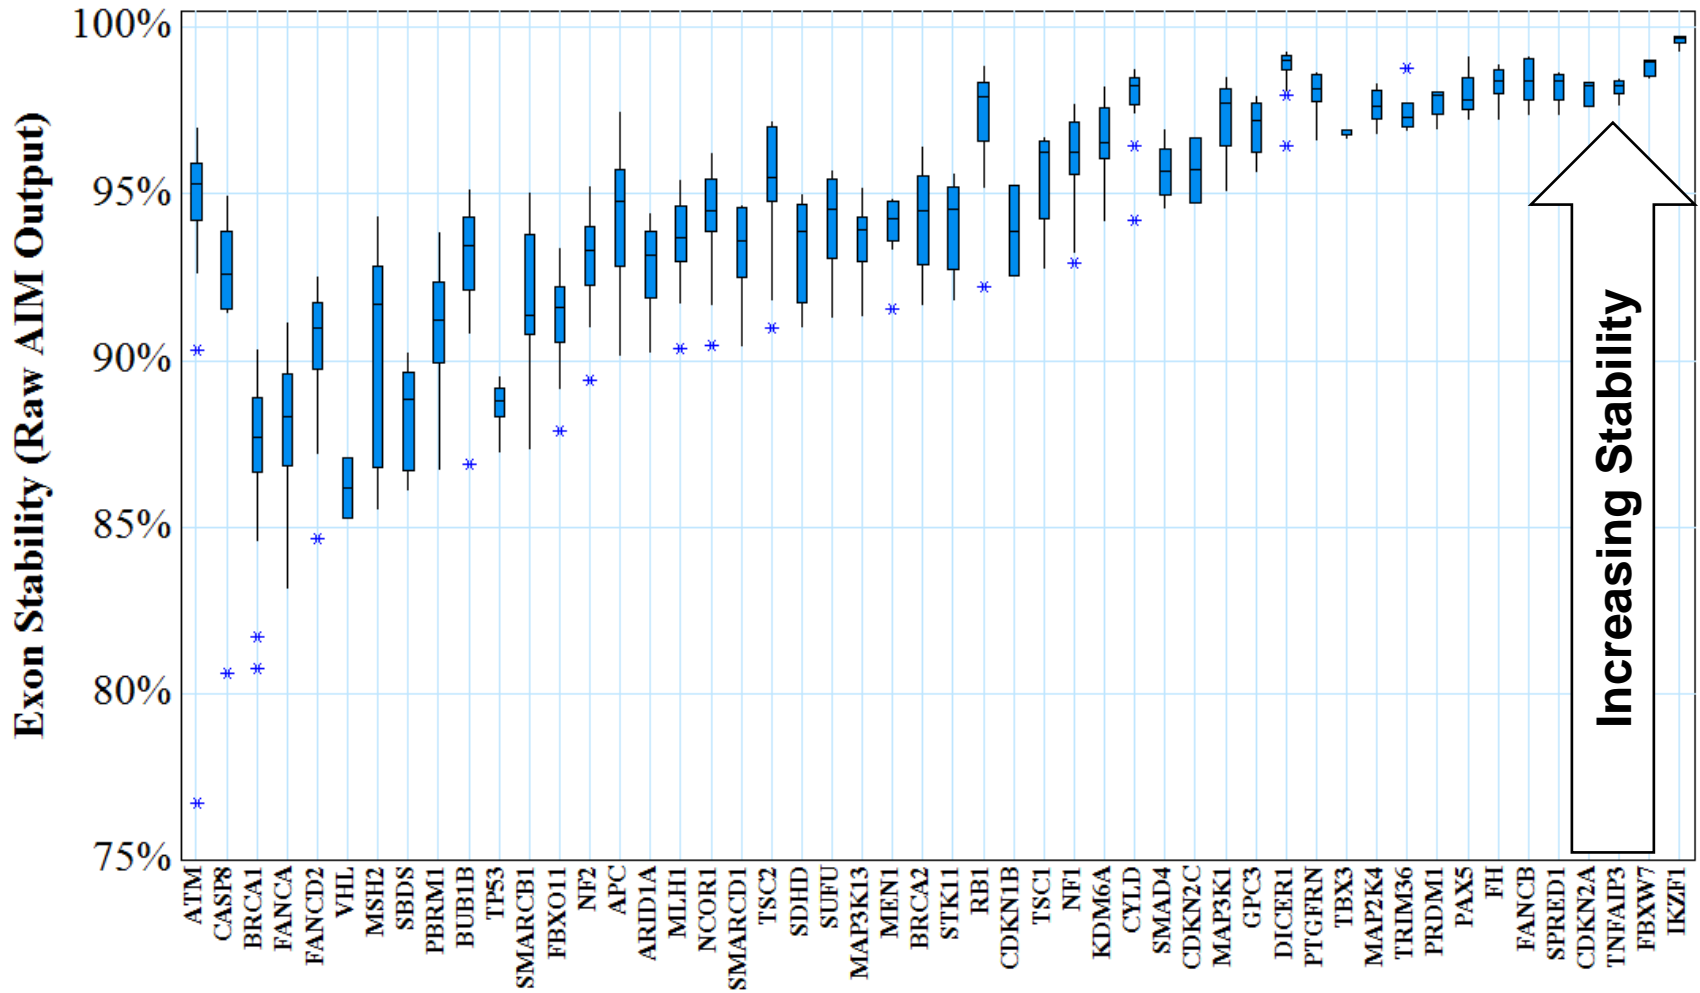

**B**

# Relative Exon Stability Distributions, Random Genes

*(plotted in order of most unstable exon, left-to-right)*

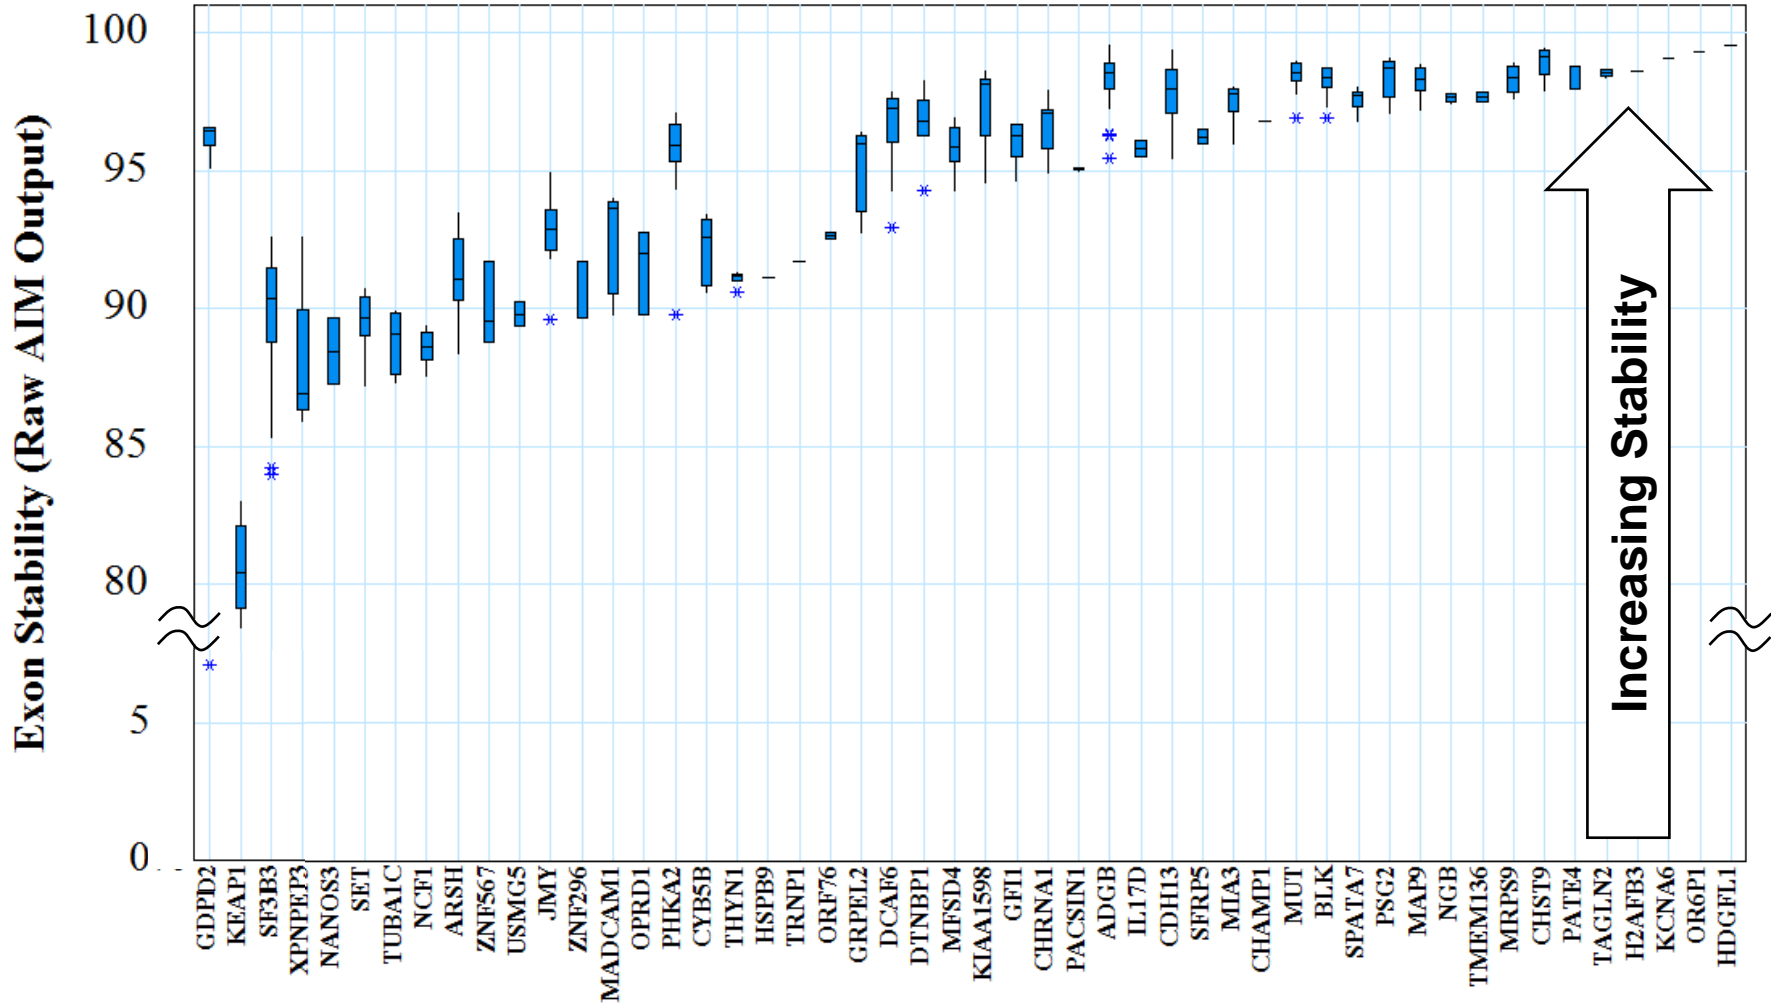

Supplement: pone.0065188.s012.pdf [file pone.0065188.s012.pdf]
