# Supplementary material for: A Comparison of 100 Human Genes Using an Alu Element-Based Instability Model
Source: PubMed Central journal article supplement (PMC3670932; doi:10.1371/journal.pone.0065188), 2013-06-03

# A Hybrid Regression Fit for 2.5th Percentile, Type 1, LL\* *Alu* Pairs

(Separate Quadratic Regressions for APSNs 1-11 and APSNs 12-115, breakpoint = 4,500 bp)

$$\log_{10} I:D(1-11) = -0.7554 + 0.4890 \log_{10} \text{MSS}(1-11) - 0.07995 \log_{10} \text{MSS}(1-11)^2; \log_{10} I:D(12-115) = -0.1519 + 0.03282 \log_{10} \text{MSS}(12-115)$$

4,500 base pair

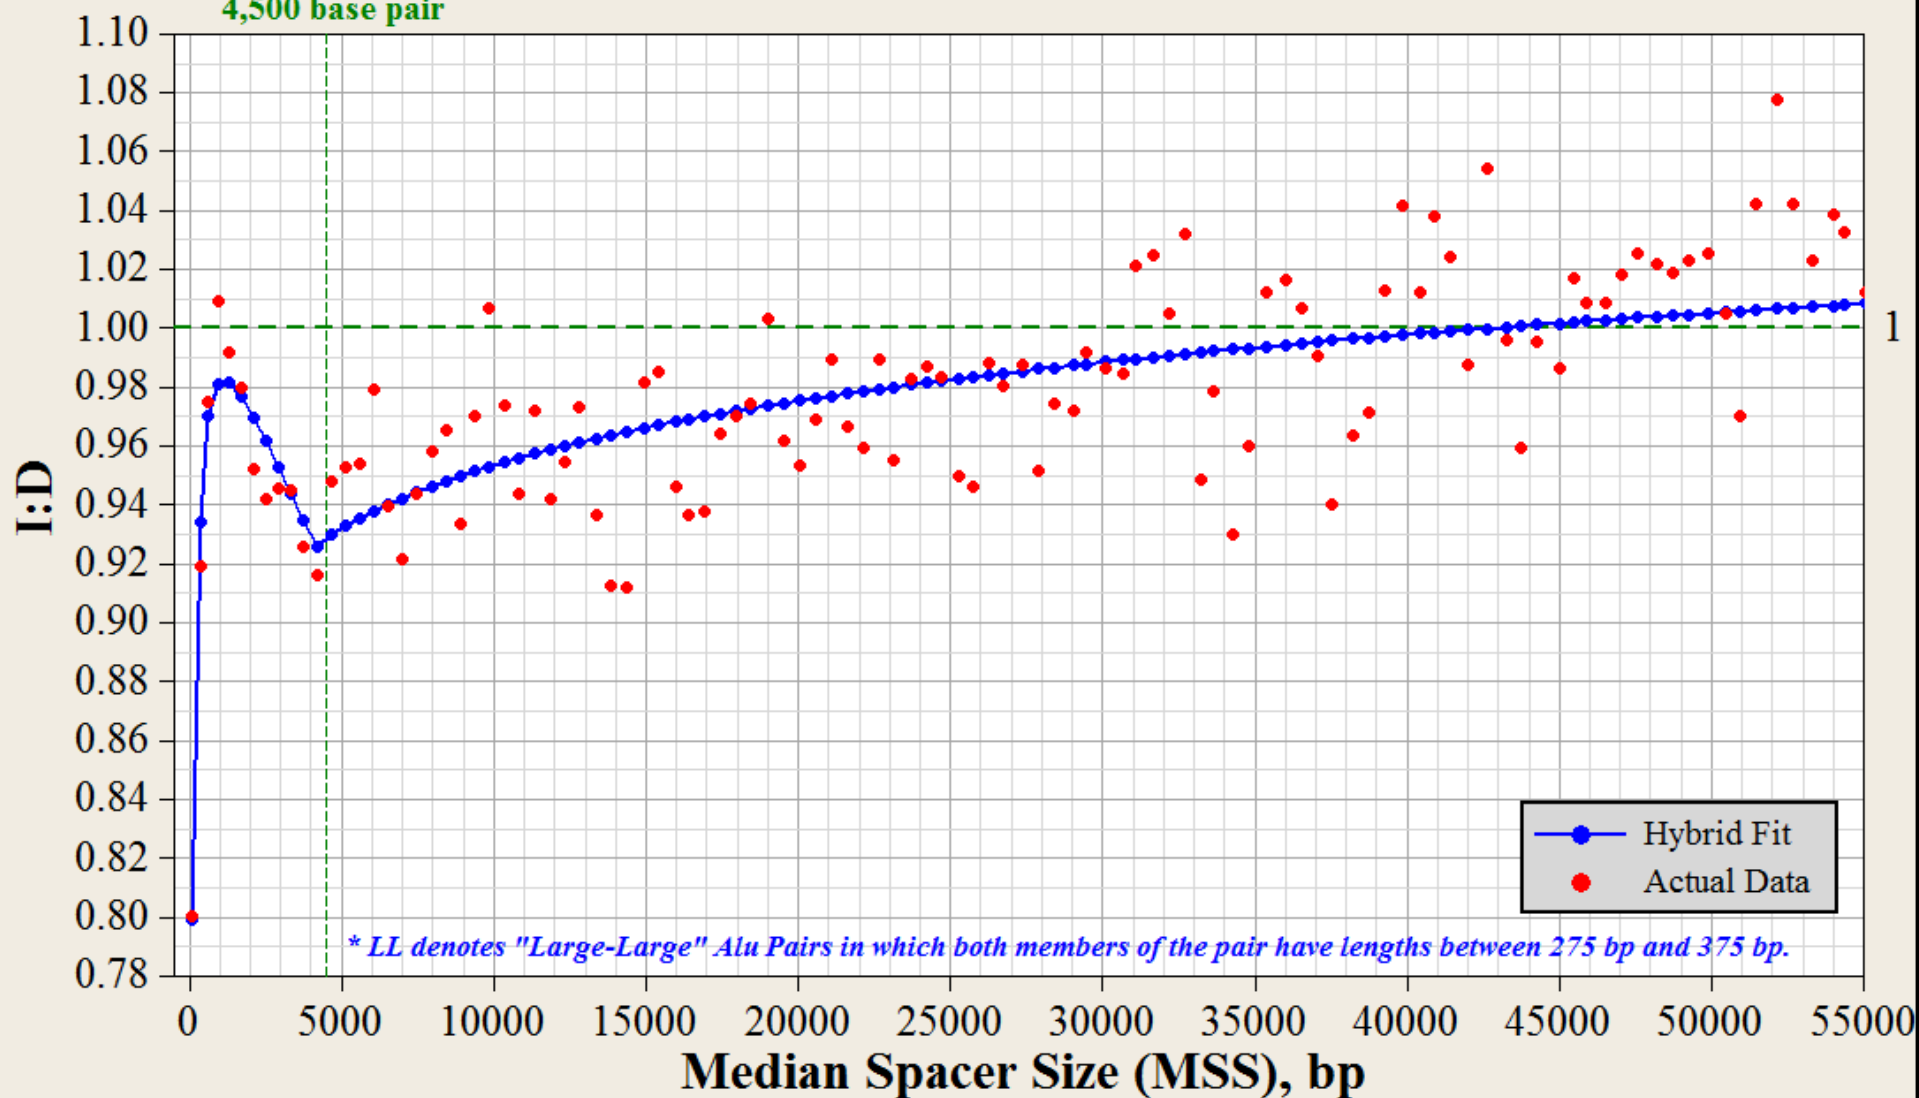

## B Hybrid Regression Fit for 2.5th Percentile, Type 2, LL\* *Alu* Pairs

(Separate Quadratic Regressions for APSNs 1-5 and APSNs 5-115, breakpoint = 1,700 bp)

$$I:D(1-5) = 0.7961 + 0.000355 \text{ MSS}(1-5) - 0.000000 \text{ MSS}(1-5)**2; I:D(5-115) = 0.9445 + 0.000002 \text{ MSS}(5-115) - 0.000000 \text{ MSS}(5-115)**2$$

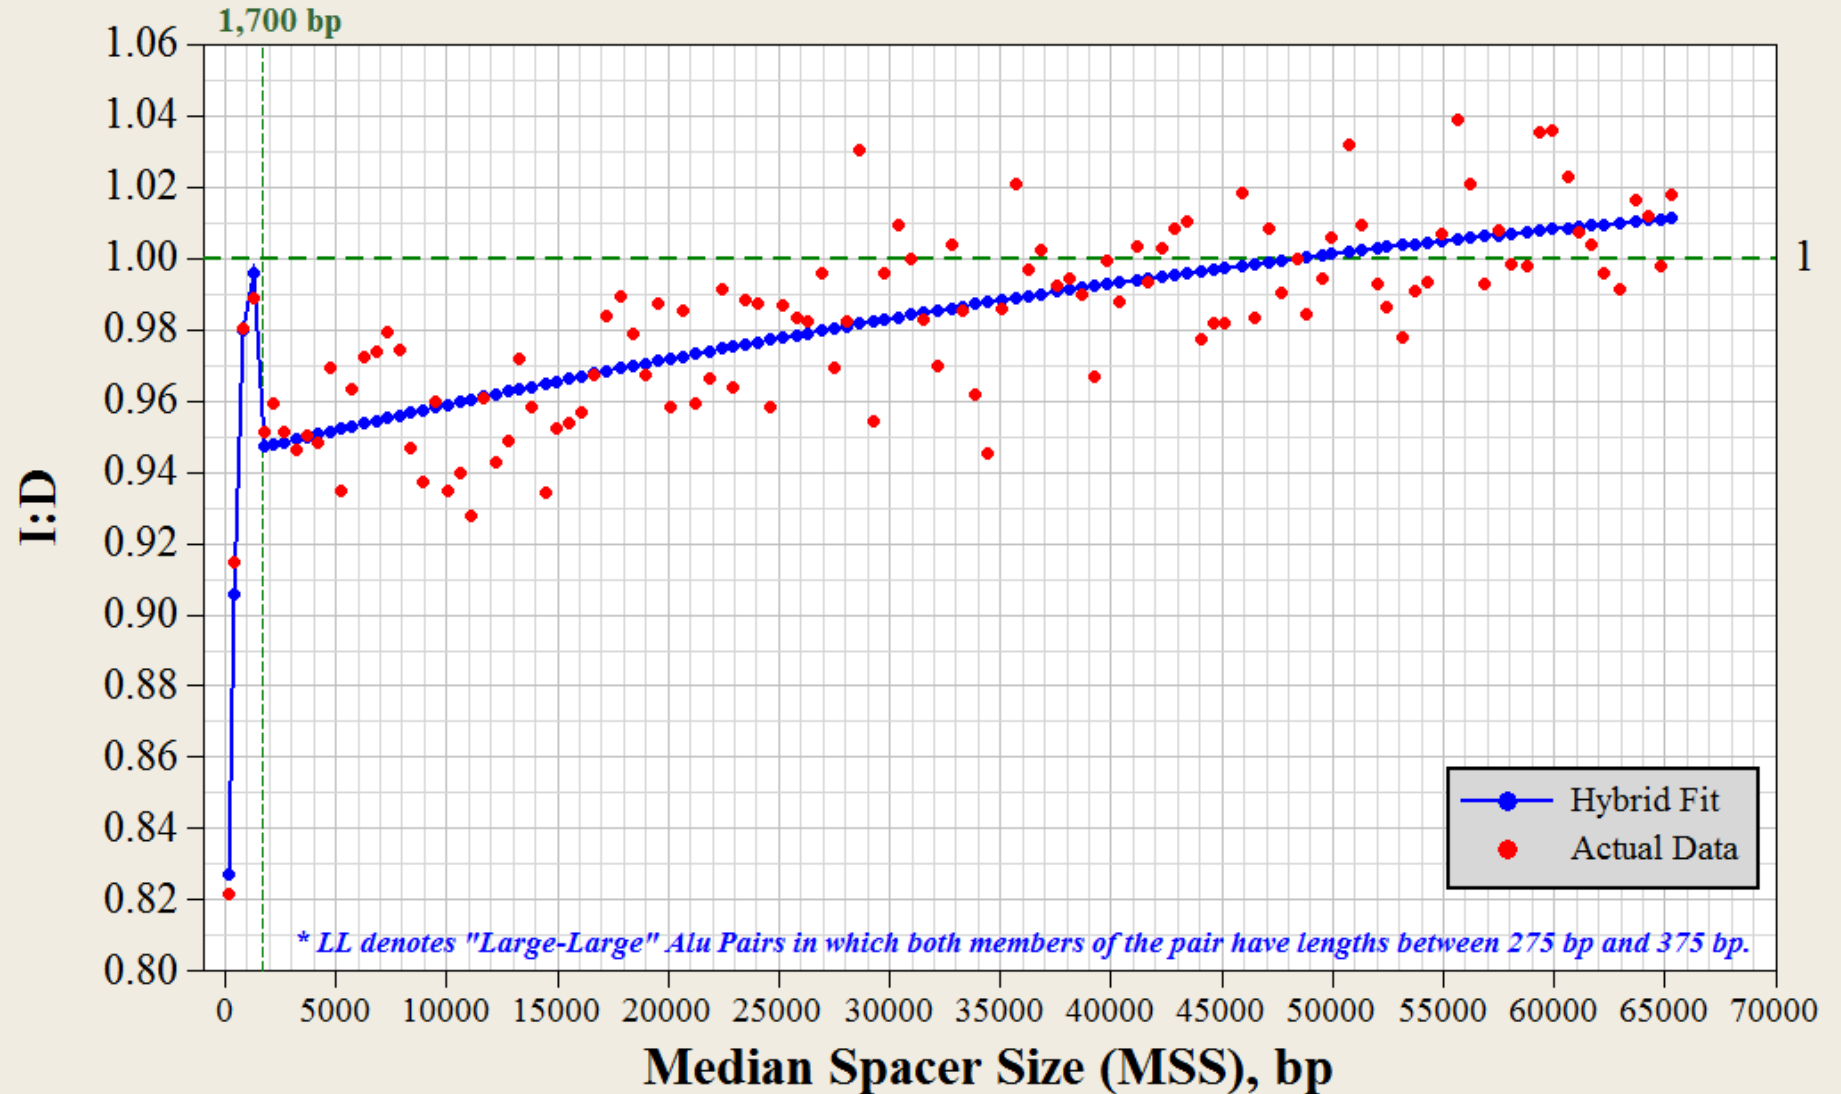

# C Hybrid Regression Fit for 2.5th Percentile, Type 3, LL\* *Alu* Pairs

$$\log_{10} I:D (2-115) = -0.1793 + 0.1719 \log_{10} MSS (2-115) - 0.05702 \log_{10} MSS (2-115)**2 + 0.006045 \log_{10} MSS (2-115)**3$$

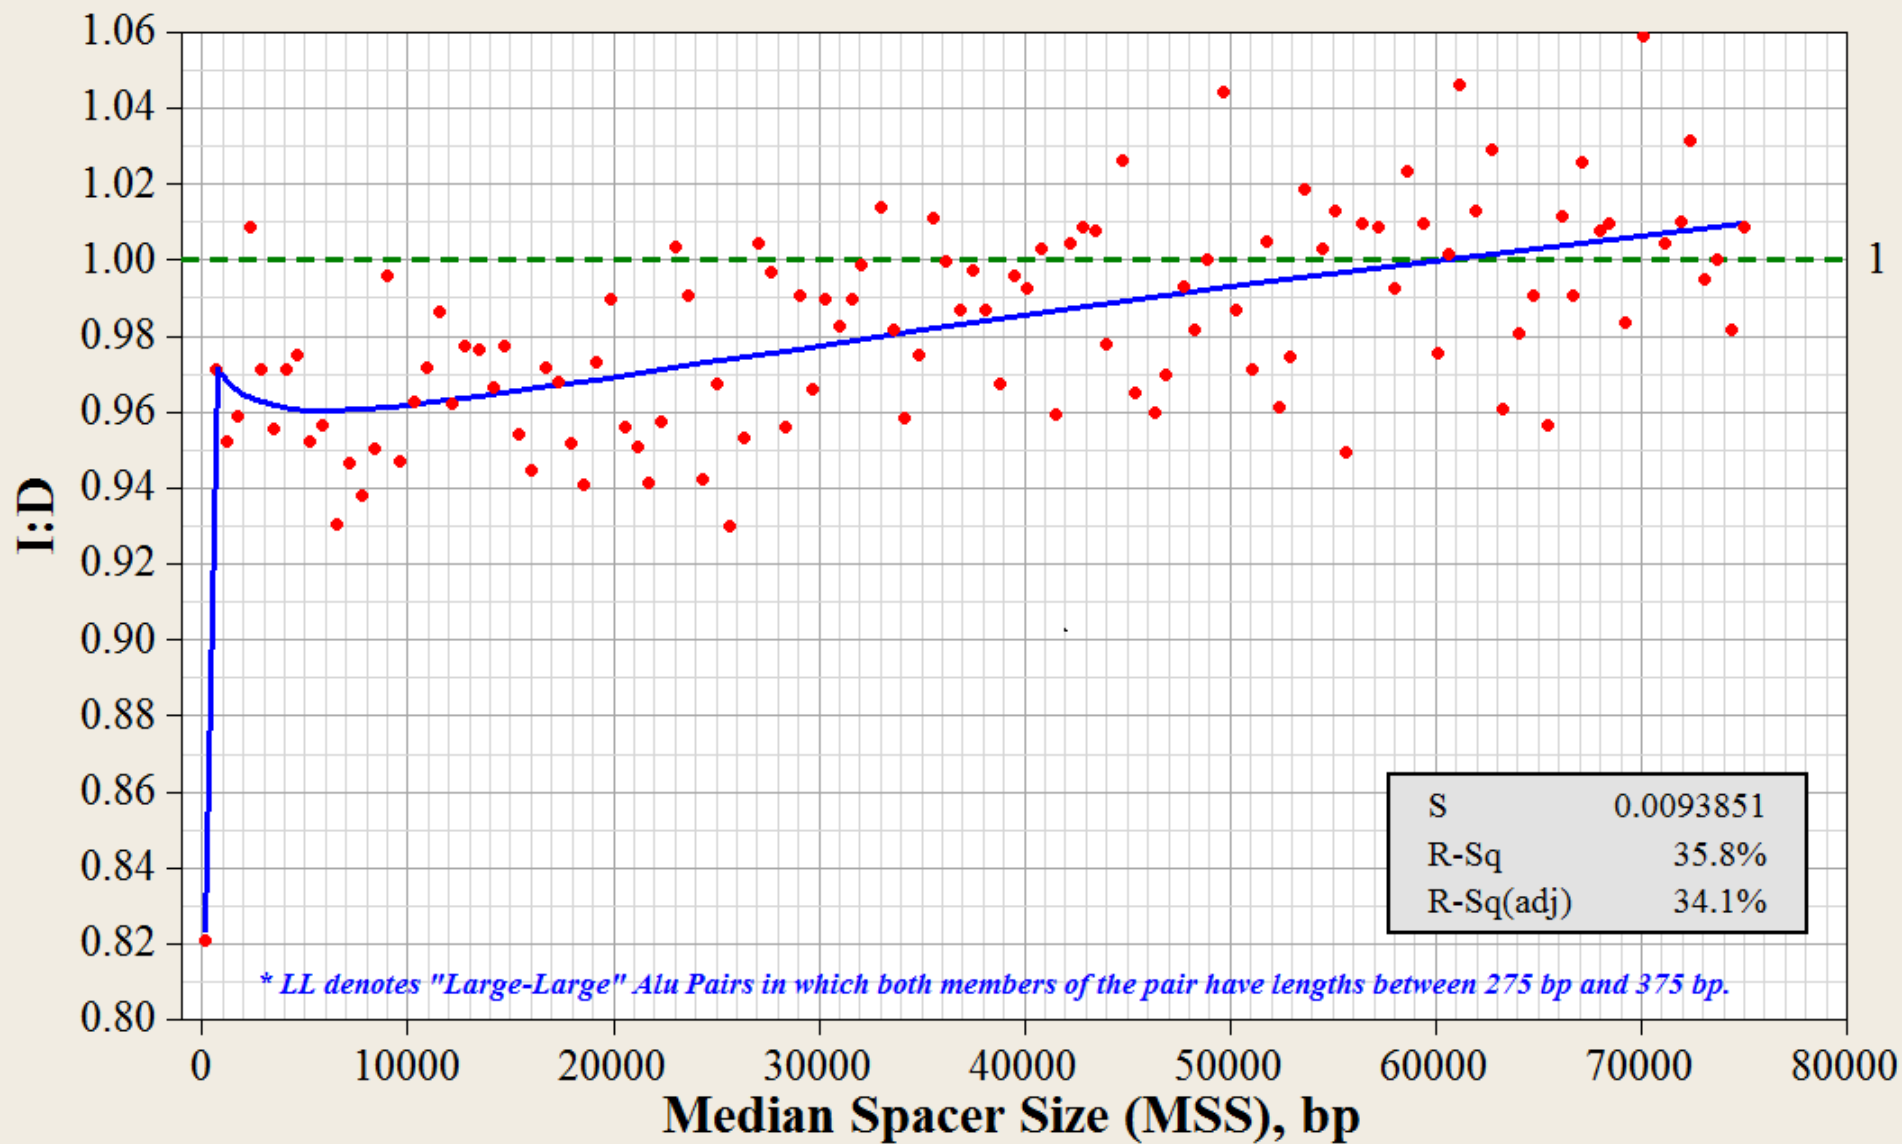

Supplement: pone.0065188.s013.pdf [file pone.0065188.s013.pdf]
