# Supplementary material for: A Comparison of 100 Human Genes Using an Alu Element-Based Instability Model
Source: PLoS One. 2013 Jun 3;8(6):e65188. doi: 10.1371/journal.pone.0065188 (PMC3670932; doi:10.1371/journal.pone.0065188)
Supplement: Table S2 — Raw and fitted I∶D ratios for the ten spacer size groupings for Type 1 Alu pairs. (PDF) [file pone.0065188.s002.pdf]

**Raw and fitted L:D ratios for the ten spacer size groupings for Type I *Alu* pairs (*Alu* length = 275-325 bp, hg19)**

| APSN | 0-5th Percentile                 |                        |                        |                                  | 6-15th Percentile      |                        |                                  |                        | 16-25th Percentile     |                                  |                        |                        | 26-35th Percentile               |                        |                        |                                  | 36-45th Percentile     |                        |                                  |                        | 46-55th Percentile     |                                  |                        |                        | 56-65th Percentile               |                        |                        |                                  | 66-75th Percentile     |                        |                                  |                        | 76-85th Percentile     |  |  |  | 86-95th Percentile |  |  |  |
|------|----------------------------------|------------------------|------------------------|----------------------------------|------------------------|------------------------|----------------------------------|------------------------|------------------------|----------------------------------|------------------------|------------------------|----------------------------------|------------------------|------------------------|----------------------------------|------------------------|------------------------|----------------------------------|------------------------|------------------------|----------------------------------|------------------------|------------------------|----------------------------------|------------------------|------------------------|----------------------------------|------------------------|------------------------|----------------------------------|------------------------|------------------------|--|--|--|--------------------|--|--|--|
|      | Median<br>Spacer<br>Size<br>(bp) | Actual<br>L:D<br>Ratio | Fitted<br>L:D<br>Ratio |  |  |  |                    |  |  |  |
| 1    | 300                              | 0.907                  | 0.7994                 | 265                              | 0.914                  | 0.9194                 | 470                              | 0.917                  | 0.9129                 | 691                              | 0.9236                 | 0.9178                 | 965                              | 0.9488                 | 0.8780                 | 1337                             | 0.837                  | 0.8339                 | 0.8330                           | 1490                   | 0.8452                 | 0.8652                           | 2755                   | 0.9714                 | 0.8916                           | 4280                   | 0.8999                 | 0.9159                           | 7438                   | 1.0042                 | 0.9601                           |                        |                        |  |  |  |                    |  |  |  |
| 2    | 344                              | 0.9194                 | 0.9444                 | 550                              | 0.918                  | 0.9706                 | 809                              | 0.962                  | 0.9708                 | 1092                             | 0.968                  | 0.9708                 | 1447                             | 0.968                  | 0.9841                 | 1926                             | 0.978                  | 0.9804                 | 0.9804                           | 2414                   | 0.9698                 | 0.9748                           | 3758                   | 0.9719                 | 0.9840                           | 5826                   | 0.9821                 | 0.9914                           | 10299                  | 0.9919                 | 0.9959                           |                        |                        |  |  |  |                    |  |  |  |
| 3    | 432                              | 0.9291                 | 0.9378                 | 735                              | 0.947                  | 0.9411                 | 1291                             | 0.982                  | 0.9525                 | 1605                             | 0.986                  | 0.995                  | 2148                             | 0.9894                 | 0.9921                 | 2796                             | 0.9882                 | 0.9789                 | 0.9882                           | 3529                   | 0.9852                 | 0.9834                           | 5279                   | 0.9923                 | 0.9962                           | 8126                   | 0.9913                 | 0.9921                           | 14075                  | 0.9951                 | 0.9941                           |                        |                        |  |  |  |                    |  |  |  |
| 4    | 572                              | 0.9094                 | 0.9814                 | 1391                             | 0.9282                 | 0.9254                 | 1853                             | 0.9307                 | 0.9155                 | 2354                             | 0.9040                 | 0.9119                 | 2978                             | 0.8930                 | 0.8986                 | 3812                             | 0.8897                 | 0.8909                 | 0.8980                           | 5041                   | 0.8837                 | 0.8916                           | 7030                   | 0.9192                 | 0.9127                           | 10469                  | 0.9123                 | 0.9265                           | 18460                  | 0.9478                 | 0.9531                           |                        |                        |  |  |  |                    |  |  |  |
| 5    | 1323                             | 0.9293                 | 0.9816                 | 1466                             | 0.9177                 | 0.9170                 | 2447                             | 0.9276                 | 0.9059                 | 3081                             | 0.9063                 | 0.9112                 | 3851                             | 0.8843                 | 0.9017                 | 4909                             | 0.8876                 | 0.8968                 | 0.8968                           | 6417                   | 0.9132                 | 0.8985                           | 8467                   | 0.9192                 | 0.8985                           | 11265                  | 0.9146                 | 0.9287                           | 22676                  | 0.9471                 | 0.9528                           |                        |                        |  |  |  |                    |  |  |  |
| 6    | 1494                             | 0.9801                 | 0.9770                 | 2359                             | 0.9819                 | 0.9821                 | 3900                             | 0.9896                 | 0.995                  | 5319                             | 0.9666                 | 0.9108                 | 6742                             | 0.8843                 | 0.9081                 | 8598                             | 0.8822                 | 0.8962                 | 0.9085                           | 10706                  | 0.9062                 | 0.9221                           | 15484                  | 0.9783                 | 0.9828                           | 26666                  | 0.9830                 | 0.9925                           |                        |                        |                                  |                        |                        |  |  |  |                    |  |  |  |
| 7    | 2091                             | 0.9450                 | 0.9699                 | 3489                             | 0.8808                 | 0.9093                 | 5692                             | 0.8774                 | 0.8958                 | 8385                             | 0.9074                 | 0.9106                 | 10577                            | 0.8782                 | 0.9108                 | 14704                            | 0.8843                 | 0.9013                 | 0.9013                           | 19118                  | 0.8825                 | 0.9082                           | 32563                  | 0.9117                 | 0.9260                           | 18722                  | 0.9099                 | 0.9350                           | 31551                  | 0.9687                 | 0.9532                           |                        |                        |  |  |  |                    |  |  |  |
| 8    | 2490                             | 0.9449                 | 0.9616                 | 3898                             | 0.8849                 | 0.9078                 | 6243                             | 0.8955                 | 0.8944                 | 8581                             | 0.9014                 | 0.9105                 | 10620                            | 0.8914                 | 0.9151                 | 14599                            | 0.8868                 | 0.9099                 | 0.9099                           | 19127                  | 0.8827                 | 0.9123                           | 32431                  | 0.9257                 | 0.9292                           | 21497                  | 0.9091                 | 0.9375                           | 36034                  | 0.9841                 | 0.9577                           |                        |                        |  |  |  |                    |  |  |  |
| 9    | 2912                             | 0.9458                 | 0.9528                 | 4531                             | 0.9183                 | 0.9072                 | 7409                             | 0.8873                 | 0.8950                 | 10485                            | 0.8825                 | 0.9015                 | 14069                            | 0.8526                 | 0.9015                 | 19472                            | 0.8521                 | 0.8999                 | 0.8999                           | 25189                  | 0.8519                 | 0.9158                           | 40861                  | 0.8822                 | 0.9221                           | 24354                  | 0.9214                 | 0.9025                           | 39563                  | 0.9542                 |                                  |                        |                        |  |  |  |                    |  |  |  |
| 10   | 3337                             | 0.9453                 | 0.9439                 | 5078                             | 0.9040                 | 0.9077                 | 8508                             | 0.9057                 | 0.9066                 | 11601                            | 0.8968                 | 0.9105                 | 15137                            | 0.9010                 | 0.9211                 | 21769                            | 0.9027                 | 0.9218                 | 0.9218                           | 28244                  | 0.9218                 | 0.9218                           | 45730                  | 0.9278                 | 0.9262                           | 29726                  | 0.9652                 | 0.9428                           | 49317                  | 0.957                  | 0.9596                           |                        |                        |  |  |  |                    |  |  |  |
| 11   | 4219                             | 0.9162                 | 0.9258                 | 6402                             | 0.9175                 | 0.9084                 | 9405                             | 0.9088                 | 0.9051                 | 12460                            | 0.9214                 | 0.9106                 | 16521                            | 0.8929                 | 0.9151                 | 22984                            | 0.8858                 | 0.9151                 | 0.9151                           | 29517                  | 0.9246                 | 0.9246                           | 47328                  | 0.9263                 | 0.9351                           | 33717                  | 0.9783                 | 0.9455                           | 54434                  | 0.9788                 | 0.9561                           |                        |                        |  |  |  |                    |  |  |  |
| 12   | 4672                             | 0.9483                 | 0.9300                 | 7163                             | 0.9210                 | 0.9094                 | 10204                            | 0.9138                 | 0.9103                 | 13217                            | 0.9059                 | 0.9106                 | 17486                            | 0.9006                 | 0.9271                 | 23715                            | 0.8955                 | 0.9230                 | 0.9230                           | 30404                  | 0.8999                 | 0.9270                           | 47494                  | 0.9130                 | 0.9414                           | 35384                  | 0.9567                 | 0.9460                           | 58461                  | 0.9795                 | 0.9570                           |                        |                        |  |  |  |                    |  |  |  |
| 13   | 5114                             | 0.9256                 | 0.9259                 | 6757                             | 0.9286                 | 0.9105                 | 9432                             | 0.9052                 | 0.9163                 | 12592                            | 0.8857                 | 0.9161                 | 16739                            | 0.9251                 | 0.9261                 | 22520                            | 0.9256                 | 0.9241                 | 0.9241                           | 29363                  | 0.9259                 | 0.9259                           | 47365                  | 0.9258                 | 0.9465                           | 38426                  | 0.9545                 | 0.9473                           | 63202                  | 0.9749                 | 0.9577                           |                        |                        |  |  |  |                    |  |  |  |
| 14   | 5574                             | 0.9541                 | 0.9154                 | 7292                             | 0.9119                 | 0.9118                 | 10444                            | 0.9115                 | 0.9120                 | 13136                            | 0.9016                 | 0.9108                 | 17807                            | 0.9138                 | 0.9111                 | 23657                            | 0.9132                 | 0.9207                 | 0.9207                           | 30475                  | 0.9211                 | 0.9311                           | 47499                  | 0.9303                 | 0.9447                           | 41024                  | 0.9391                 | 0.9488                           | 68492                  | 0.9830                 | 0.9585                           |                        |                        |  |  |  |                    |  |  |  |
| 15   | 6041                             | 0.9793                 | 0.9719                 | 8739                             | 0.9139                 | 0.9111                 | 12071                            | 0.9106                 | 0.9269                 | 15669                            | 0.9130                 | 0.9140                 | 20880                            | 0.9052                 | 0.9332                 | 27445                            | 0.9137                 | 0.9280                 | 0.9280                           | 34902                  | 0.9082                 | 0.9332                           | 50101                  | 0.9477                 | 0.9464                           | 43719                  | 0.9771                 | 0.9503                           | 71910                  | 0.9884                 | 0.9594                           |                        |                        |  |  |  |                    |  |  |  |
| 16   | 6506                             | 0.9793                 | 0.9672                 | 9489                             | 0.9146                 | 0.9146                 | 13254                            | 0.9138                 | 0.9291                 | 17297                            | 0.9174                 | 0.9157                 | 22899                            | 0.9076                 | 0.9338                 | 34851                            | 0.9079                 | 0.9339                 | 0.9339                           | 44700                  | 0.9058                 | 0.9311                           | 63841                  | 0.9259                 | 0.9477                           | 46621                  | 0.9588                 | 0.9513                           | 71758                  | 0.981                  | 0.9693                           |                        |                        |  |  |  |                    |  |  |  |
| 17   | 6980                             | 0.9216                 | 0.9344                 | 10107                            | 0.9118                 | 0.9161                 | 14299                            | 0.9106                 | 0.9313                 | 18653                            | 0.9109                 | 0.9143                 | 24845                            | 0.9144                 | 0.9177                 | 32443                            | 0.9144                 | 0.9177                 | 0.9177                           | 41443                  | 0.9168                 | 0.9341                           | 59495                  | 0.9492                 | 0.9471                           | 68412                  | 0.9523                 | 0.9513                           | 82510                  | 0.9606                 | 0.9677                           |                        |                        |  |  |  |                    |  |  |  |
| 18   | 7463                             | 0.9439                 | 0.9445                 | 10670                            | 0.9083                 | 0.9176                 | 14188                            | 0.9083                 | 0.9332                 | 18459                            | 0.9178                 | 0.9206                 | 24716                            | 0.9187                 | 0.9351                 | 31315                            | 0.9067                 | 0.9454                 | 0.9454                           | 39685                  | 0.9083                 | 0.9351                           | 56499                  | 0.9276                 | 0.9534                           | 52505                  | 0.9576                 | 0.9536                           | 86468                  | 0.9813                 | 0.9614                           |                        |                        |  |  |  |                    |  |  |  |
| 19   | 7960                             | 0.9581                 | 0.9445                 | 11380                            | 0.9201                 | 0.9192                 | 15724                            | 0.9194                 | 0.9352                 | 20345                            | 0.9276                 | 0.9298                 | 26841                            | 0.9181                 | 0.9409                 | 42571                            | 0.9155                 | 0.9386                 | 0.9386                           | 54444                  | 0.9080                 | 0.9409                           | 77305                  | 0.9284                 | 0.9571                           | 55327                  | 0.9489                 | 0.9542                           | 91524                  | 0.9744                 | 0.9621                           |                        |                        |  |  |  |                    |  |  |  |
| 20   | 8412                             | 0.9585                 | 0.9482                 | 12107                            | 0.9287                 | 0.9207                 | 16475                            | 0.9287                 | 0.9207                 | 21475                            | 0.9287                 | 0.9207                 | 28141                            | 0.9287                 | 0.9207                 | 36475                            | 0.9287                 | 0.9207                 | 0.9207                           | 46475                  | 0.9287                 | 0.9207                           | 67475                  | 0.9287                 | 0.9207                           | 88475                  | 0.9287                 | 0.9207                           | 109475                 | 0.9287                 | 0.9207                           |                        |                        |  |  |  |                    |  |  |  |
| 21   | 8860                             | 0.9337                 | 0.9499                 | 11484                            | 0.9294                 | 0.9223                 | 14123                            | 0.9299                 | 0.9386                 | 17008                            | 0.9279                 | 0.9327                 | 22430                            | 0.9279                 | 0.9370                 | 29413                            | 0.9279                 | 0.9370                 | 0.9370                           | 37413                  | 0.9279                 | 0.9370                           | 54413                  | 0.9279                 | 0.9370                           | 71413                  | 0.9279                 | 0.9370                           | 91413                  | 0.9279                 | 0.9370                           |                        |                        |  |  |  |                    |  |  |  |
| 22   | 9280                             | 0.9293                 | 0.9516                 | 12102                            | 0.9079                 | 0.9240                 | 16400                            | 0.9099                 | 0.9403                 | 20800                            | 0.9099                 | 0.9403                 | 27800                            | 0.9099                 | 0.9403                 | 36800                            | 0.9099                 | 0.9403                 | 0.9403                           | 46800                  | 0.9099                 | 0.9403                           | 65800                  | 0.9099                 | 0.9403                           | 84800                  | 0.9099                 | 0.9403                           | 103800                 | 0.9099                 | 0.9403                           |                        |                        |  |  |  |                    |  |  |  |
| 23   | 9657                             | 0.9077                 | 0.9351                 | 13711                            | 0.9088                 | 0.9259                 | 18200                            | 0.9088                 | 0.9351                 | 23200                            | 0.9088                 | 0.9351                 | 30200                            | 0.9088                 | 0.9351                 | 39200                            | 0.9088                 | 0.9351                 | 0.9351                           | 49200                  | 0.9088                 | 0.9351                           | 68200                  | 0.9088                 | 0.9351                           | 87200                  | 0.9088                 | 0.9351                           | 106200                 | 0.9088                 | 0.9351                           |                        |                        |  |  |  |                    |  |  |  |
| 24   | 10343                            | 0.9745                 | 0.9546                 | 15314                            | 0.9271                 | 0.9272                 | 19645                            | 0.9271                 | 0.9434                 | 24600                            | 0.9271                 | 0.9434                 | 31600                            | 0.9271                 | 0.9434                 | 40600                            | 0.9271                 | 0.9434                 | 0.9434                           | 50600                  | 0.9271                 | 0.9434                           | 69600                  | 0.9271                 | 0.9434                           | 88600                  | 0.9271                 | 0.9434                           | 107600                 | 0.9271                 | 0.9434                           |                        |                        |  |  |  |                    |  |  |  |
| 25   | 10836                            | 0.9589                 | 0.9462                 | 16102                            | 0.9271                 | 0.9271                 | 20445                            | 0.9271                 | 0.9434                 | 25740                            | 0.9271                 | 0.9434                 | 32740                            | 0.9271                 | 0.9434                 | 41740                            | 0.9271                 | 0.9434                 | 0.9434                           | 51740                  | 0.9271                 | 0.9434                           | 70740                  | 0.9271                 | 0.9434                           | 89740                  | 0.9271                 | 0.9434                           | 108740                 | 0.9271                 | 0.9434                           |                        |                        |  |  |  |                    |  |  |  |
| 26   | 11319                            | 0.9727                 | 0.9546                 | 17453                            | 0.9253                 | 0.9304                 | 22142                            | 0.9253                 | 0.9464                 | 27442                            | 0.9253                 | 0.9464                 | 34442                            | 0.9253                 | 0.9464                 | 43442                            | 0.9253                 | 0.9464                 | 0.9464                           | 53442                  | 0.9253                 | 0.9464                           | 72442                  | 0.9253                 | 0.9464                           | 91442                  | 0.9253                 | 0.9464                           | 110442                 | 0.9253                 | 0.9464                           |                        |                        |  |  |  |                    |  |  |  |
| 27   | 11833                            | 0.9424                 | 0.9589                 | 18174                            | 0.9270                 | 0.9270                 | 22830                            | 0.9270                 | 0.9475                 | 28130                            | 0.9270                 | 0.9475                 | 35130                            | 0.9270                 | 0.9475                 | 44130                            | 0.9270                 | 0.9475                 | 0.9475                           | 54130                  | 0.9270                 | 0.9475                           | 73130                  | 0.9270                 | 0.9475                           | 92130                  | 0.9270                 | 0.9475                           | 111130                 | 0.9270                 | 0.9475                           |                        |                        |  |  |  |                    |  |  |  |
| 28   | 12320                            | 0.9589                 | 0.9462                 | 19102                            | 0.9271                 | 0.9271                 | 23445                            | 0.9271                 | 0.9434                 | 28745                            | 0.9271                 | 0.9434                 | 35745                            | 0.9271                 | 0.9434                 | 44745                            | 0.9271                 | 0.9434                 | 0.9434                           | 54745                  | 0.9271                 | 0.9434                           | 73745                  | 0.9271                 | 0.9434                           | 92745                  | 0.9271                 | 0.9434                           | 111745                 | 0.9271                 | 0.9434                           |                        |                        |  |  |  |                    |  |  |  |
| 29   | 12812                            | 0.9730                 | 0.9614                 | 19739                            | 0.9080                 | 0.9351                 | 25000                            | 0.9080                 | 0.9614                 | 30300                            | 0.9080                 | 0.9614                 | 37300                            | 0.9080                 | 0.9614                 | 46300                            | 0.9080                 | 0.9614                 | 0.9614                           | 56300                  | 0.9080                 | 0.9614                           | 75300                  | 0.9080                 | 0.9614                           | 94300                  | 0.9080                 | 0.9614                           |                        |                        |                                  |                        |                        |  |  |  |                    |  |  |  |
